# Supplementary material for: Chiral benzene backbone-based sulfoxide-olefin ligands for highly enantioselective Rh-catalyzed addition of arylboronic acids to N-tosylarylimines
Source: Royal Society of Chemistry journal article supplement (doi:10.1039/c9ra04836g), 2019-01-01

Supporting Information:

**Chiral benzene backbone-based sulfoxide-olefin ligands for highly  
enantioselective Rh-catalyzed addition of arylboronic acids to  
N-tosylarylimines**

Feng Xue,<sup>\*,a</sup> Yong Zhu,<sup>a</sup> Yunfei Qing<sup>a</sup> and Boshun Wan<sup>\*,b</sup>

*<sup>a</sup>Key Laboratory of Functional Organic Molecules of Xinxiang City Henan Province, College of Chemistry and  
Chemical Engineering, Henan Institute of Science and Technology, Xinxiang Henan, 453002, China. E-mail:  
fxuehist@sina.com*

*<sup>b</sup>Dalian Institute of Chemical Physics, Chinese Academy of Sciences, 457 Zhongshan Road, Dalian 116023,  
China. E-mail: bswan@dicp.ac.cn*

**Table of Contents**

|                                                                                               |                |
|-----------------------------------------------------------------------------------------------|----------------|
| <b>1. General .....</b>                                                                       | <b>S1</b>      |
| <b>2. General procedure for Rh-catalyzed addition.....</b>                                    | <b>S1</b>      |
| <b>3. Characterization and HPLC of the obtained adducts.....</b>                              | <b>S2–S36</b>  |
| <b>4. References.....</b>                                                                     | <b>S37</b>     |
| <b>5. Copies of <sup>1</sup>H and <sup>13</sup>C NMR spectra of the obtained adducts.....</b> | <b>S38–S66</b> |

## 1. General

All reactions were carried out under an atmosphere of nitrogen using the standard Schlenk techniques, unless otherwise noted. Solvents were dried and distilled by standard procedures. <sup>1</sup>H NMR and <sup>13</sup>C NMR spectra were recorded at room temperature in CDCl<sub>3</sub> on 400 MHz and 600 MHz instrument with tetramethylsilane (TMS) as internal standard. Enantiomeric excess was determined by HPLC analysis, using chiral column described below in detail. Optical rotations were measured by polarimeter. Flash column chromatography was performed on silica gel (200-300 mesh). All reactions were monitored by TLC analysis.

Commercially available reagents were used throughout without further purification other than those detailed below. THF, Et<sub>2</sub>O and toluene were distilled over sodium benzophenone ketyl under nitrogen. Methylene chloride was distilled over calcium hydride. Arylboronic acids were recrystallized from water.

*N*-tosylarylimines **1** can be conveniently synthesized according to the known literature procedures.<sup>[1]</sup> Ligands **L1-6** were prepared according to literature procedures.<sup>[2]</sup>

## 2. General Procedure for the enantioselective Rh-catalyzed addition of arylboronic acids to *N*-tosylarylimines

Under nitrogen atmosphere, a mixture of [RhCl(C<sub>2</sub>H<sub>4</sub>)<sub>2</sub>]<sub>2</sub> (1.8 mg, 0.0045 mmol) and ligand **L6f** (4.7 mg, 0.0099 mmol) in 1 mL toluene was stirred at room temperature for 1 h. At which time arylboronic acid (0.45 mmol) was added, followed by *N*-tosylarylimines (0.30 mmol), aqueous KF (1.5 M in H<sub>2</sub>O, 0.20 mL, 0.30 mmol) and toluene (1 mL). The reaction was stirred at 50 °C for 5-6 h. When the reaction was over, the reaction mixture was concentrated in vacuo and purified by silica gel flash column chromatography (petroleum ether/ethyl acetate as eluent) to afford the product.

### 3. Characterization and HPLC of the obtained adducts

(*S*)-*N*-((4-methoxyphenyl)(phenyl)methyl)-4-methylbenzenesulfonamide (**3aa**).<sup>[6]</sup> White solid, 106 mg, 96% yield, 97% ee, m.p. 130–132 °C.  $[\alpha]_D^{24} = -17.0$  ( $c = 1.00$ ,  $\text{CHCl}_3$ ). HPLC: Chiracel

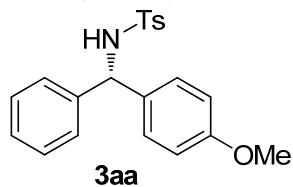

OD-H Column, *n*-hexane/*i*-propanol = 70/30, flow = 1.0 mL/min,  $\lambda = 230$  nm, 25 °C,  $t_R = 5.97$  min (major) and 8.04 min (minor).  $^1\text{H}$  NMR (400 MHz,  $\text{CDCl}_3$ )  $\delta$  7.55 (d,  $J = 8.3$  Hz, 2H), 7.23 – 7.16 (m, 3H), 7.15 – 7.07 (m, 4H), 7.02 – 6.95 (m, 2H), 6.75 – 6.68 (m, 2H), 5.51 (d,  $J = 7.1$  Hz, 1H), 5.27 (d,  $J = 6.9$  Hz, 1H), 3.74 (s, 3H), 2.37 (s, 3H).

$^{13}\text{C}$  NMR (100 MHz,  $\text{CDCl}_3$ )  $\delta$  159.1, 143.3, 140.9, 137.5, 132.9, 129.5, 128.7, 128.6, 127.6, 127.4, 127.3, 114.0, 60.9, 55.4, 21.6.

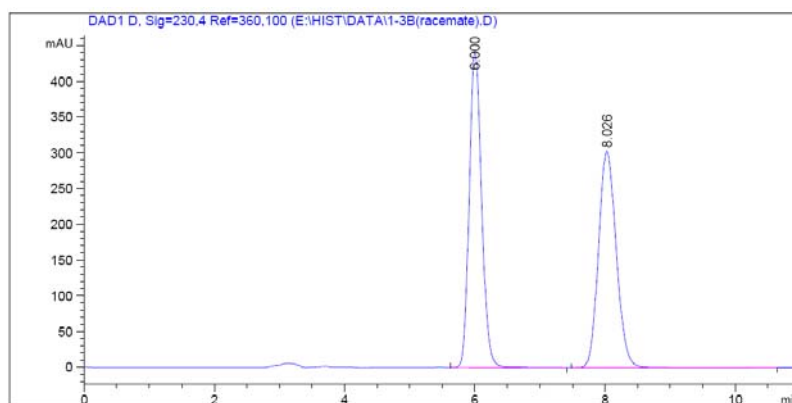

#### Results

| Peak No.     | Peak ID | Ret Time (min) | Height (mAU) | Area (mAU.s) | Conc (%) |
|--------------|---------|----------------|--------------|--------------|----------|
| 1            |         | 6.000          | 441.56912    | 5828.17871   | 50.3994  |
| 2            |         | 8.026          | 302.51950    | 5735.79639   | 49.6006  |
| <b>Total</b> |         |                | 744.08862    | 1.15640e4    | 100.000  |

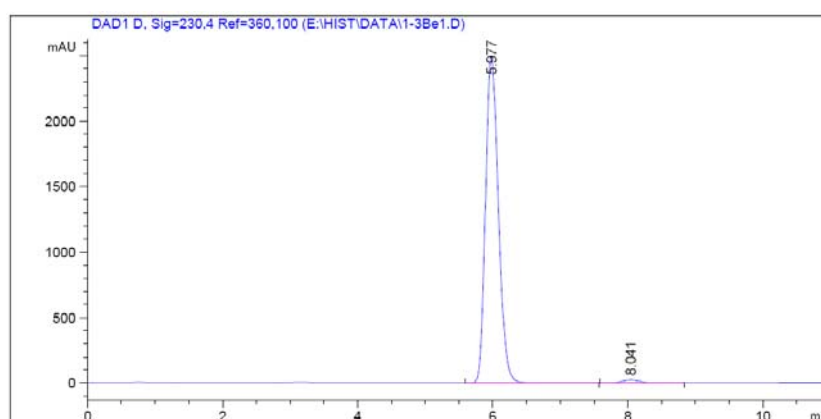

#### Results

| Peak No.     | Peak ID | Ret Time (min) | Height (mAU) | Area (mAU.s) | Conc (%) |
|--------------|---------|----------------|--------------|--------------|----------|
| 1            |         | 5.977          | 2498.24023   | 3.31195e4    | 98.5579  |
| 2            |         | 8.041          | 25.50181     | 484.58978    | 1.4421   |
| <b>Total</b> |         |                | 2523.74205   | 3.36041e4    | 100.000  |

(*S*)-*N*-((2-methoxyphenyl)(phenyl)methyl)-4-methylbenzenesulfonamide(**3ab**).<sup>[5]</sup> White solid, 102 mg, 93% yield, 96% ee, m.p. 119–121 °C.  $[\alpha]_D^{24} = -25.1$  ( $c = 1.00$ ,  $\text{CHCl}_3$ ). HPLC: Chiralcel OD-H Column, *n*-hexane/*i*-propanol = 80/20, flow = 1.0 mL/min,  $\lambda = 230$  nm, 25 °C,  $t_R = 6.04$  min (minor) and 6.76 min (major).  $^1\text{H}$  NMR (600 MHz,  $\text{CDCl}_3$ )  $\delta$  7.51 (d,  $J = 7.5$  Hz, 2H), 7.25 – 7.12 (m, 6H), 7.04 (d,  $J = 7.6$  Hz, 2H), 6.98 (d,  $J = 7.3$  Hz, 1H), 6.77 (t,  $J = 7.3$  Hz, 1H), 6.67 (d,  $J = 8.2$  Hz, 1H), 5.87 – 5.75 (m, 1H), 5.65 (d,  $J = 9.1$  Hz, 1H), 3.59 (s, 3H), 2.32 (s, 3H).  $^{13}\text{C}$  NMR (150 MHz,  $\text{CDCl}_3$ )  $\delta$  156.5, 142.9, 140.7, 137.6, 129.7, 129.2, 129.1, 128.3, 127.8, 127.2, 127.1, 126.9, 120.8, 111.2, 59.2, 55.4, 21.5.

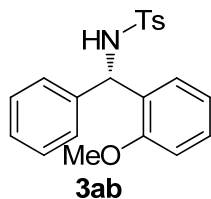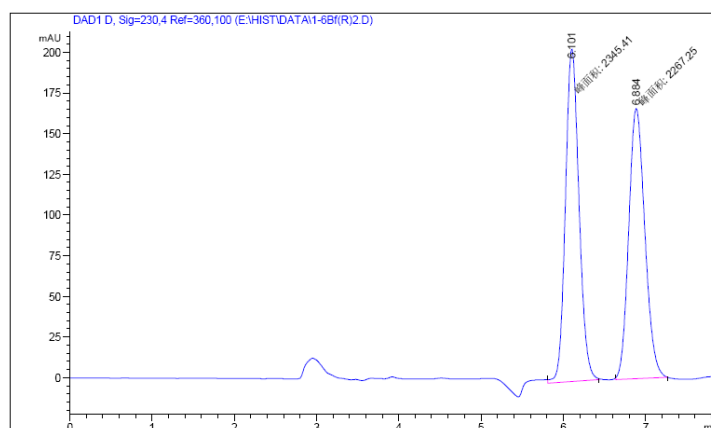

### Results

| Peak No.     | Peak ID | Ret Time (min) | Height (mAU) | Area (mAU*s) | Conc (%) |
|--------------|---------|----------------|--------------|--------------|----------|
| 1            |         | 6.101          | 204.80034    | 2345.40869   | 50.8472  |
| 2            |         | 6.884          | 166.39490    | 2267.24731   | 49.1528  |
| <b>Total</b> |         |                | 371.19524    | 46612.65601  | 100.000  |

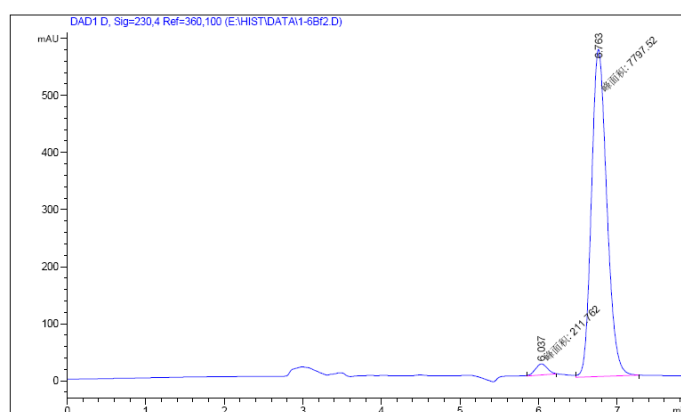

### Results

| Peak No.     | Peak ID | Ret Time (min) | Height (mAU) | Area (mAU*s) | Conc (%) |
|--------------|---------|----------------|--------------|--------------|----------|
| 1            |         | 6.037          | 19.66265     | 211.76219    | 2.6440   |
| 2            |         | 6.763          | 574.44745    | 7797.52490   | 97.3560  |
| <b>Total</b> |         |                | 594.11010    | 8009.28709   | 100.000  |

(*S*)-*N*-((3-methoxyphenyl)(phenyl)methyl)-4-methylbenzenesulfonamide (**3ac**).<sup>[5]</sup> White solid,

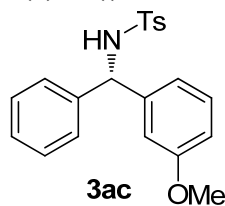

105 mg, 95% yield, 97% ee, m.p. 151–153 °C.  $[\alpha]_D^{24} = -1.6$  ( $c = 0.82$ ,  $\text{CHCl}_3$ ). HPLC: Chiracel OD-H Column, *n*-hexane/*i*-propanol = 90/10, flow = 1.0 mL/min,  $\lambda = 230$  nm, 25 °C,  $t_R = 11.83$  min (minor) and 13.07 min (major).  $^1\text{H NMR}$  (600 MHz,  $\text{CDCl}_3$ )  $\delta$  7.56 (d,  $J = 8.3$  Hz, 2H), 7.25 – 7.17 (m, 3H), 7.14 – 7.10 (m, 5H), 6.73 – 6.71 (m, 1H), 6.67 (d,  $J = 7.6$  Hz, 1H), 6.63 – 6.59 (m, 1H), 5.53 (d,  $J = 7.1$  Hz, 1H), 5.10 (d,  $J = 7.0$  Hz, 1H), 3.68 (s, 3H), 2.37 (s, 3H).  $^{13}\text{C NMR}$  (150 MHz,  $\text{CDCl}_3$ )  $\delta$  159.8, 143.4, 142.2, 140.6, 137.5, 129.7, 129.5, 128.7, 127.8, 127.5, 127.4, 119.9, 113.2, 113.1, 61.4, 55.3, 21.6.

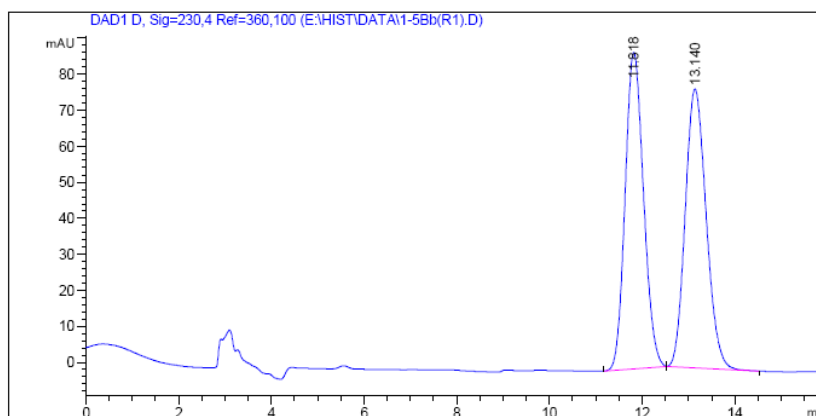

#### Results

| Peak No.     | Peak ID | Ret Time (min) | Height (mAU) | Area (mAU.s) | Conc (%) |
|--------------|---------|----------------|--------------|--------------|----------|
| 1            |         | 11.818         | 87.73759     | 2418.31567   | 49.9408  |
| 2            |         | 13.140         | 77.31465     | 2424.04712   | 50.0592  |
| <b>Total</b> |         |                | 165.05225    | 4842.36279   | 100.000  |

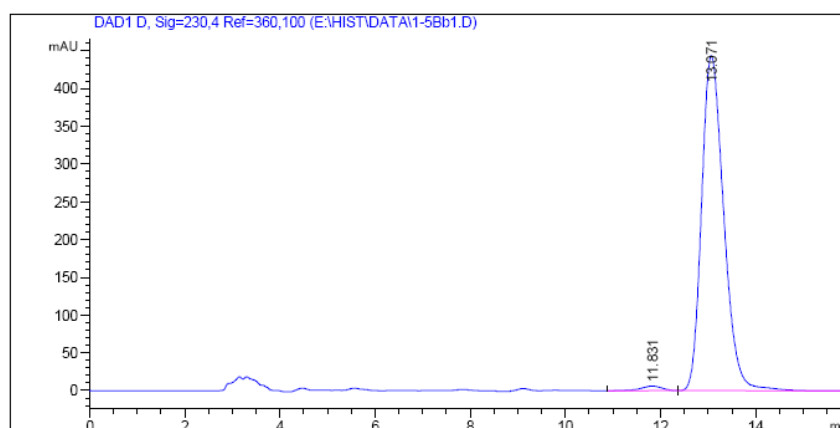

#### Results

| Peak No.     | Peak ID | Ret Time (min) | Height (mAU) | Area (mAU.s) | Conc (%) |
|--------------|---------|----------------|--------------|--------------|----------|
| 1            |         | 11.831         | 6.10408      | 194.35416    | 1.3347   |
| 2            |         | 13.071         | 443.29144    | 1.43669e4    | 98.6653  |
| <b>Total</b> |         |                | 449.39552    | 1.45613e4    | 100.000  |

**(S)-4-methyl-N-(phenyl(*o*-tolyl)methyl)benzenesulfonamide(3ad).** <sup>[6]</sup> White solid, 99 mg, 94% yield, 97% ee, m.p. 137–139 °C.  $[\alpha]_D^{24} = +9.3$  ( $c = 0.72$ ,  $\text{CHCl}_3$ ). HPLC: Chiracel OD-H Column, *n*-hexane/*i*-propanol = 70/30, flow = 1.0 mL/min,  $\lambda = 230$  nm, 25 °C,  $t_R = 4.33$  min (minor) and 4.94 min (major). <sup>1</sup>H NMR (600 MHz,  $\text{CDCl}_3$ )  $\delta$  7.54 (d,  $J = 7.5$  Hz, 2H), 7.18 (s, 3H), 7.11 (d,  $J = 7.8$  Hz, 4H), 7.06 – 7.03 (m, 4H), 5.79 (d,  $J = 6.8$  Hz, 1H), 5.27 – 5.03 (m, 1H), 2.36 (s, 3H), 2.15 (s, 3H). <sup>13</sup>C NMR (150 MHz,  $\text{CDCl}_3$ )  $\delta$  143.3, 140.1, 138.4, 137.6, 135.6, 130.8, 129.4, 128.7, 127.7, 127.3, 127.2, 126.3, 58.2, 21.6, 19.5.

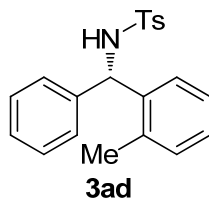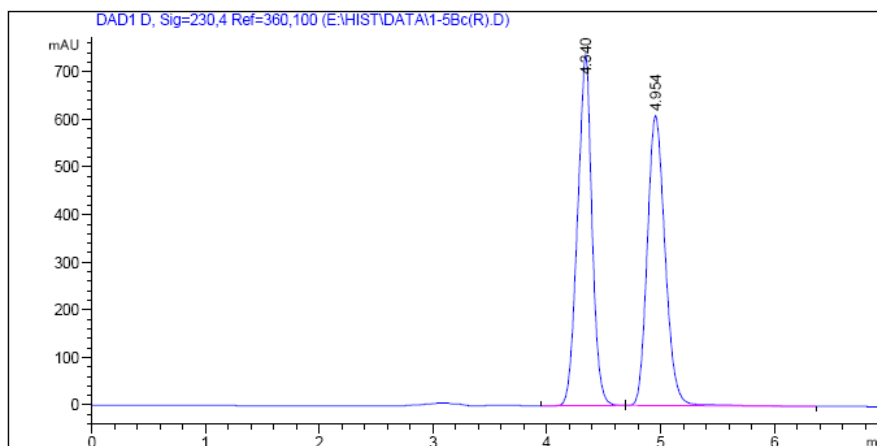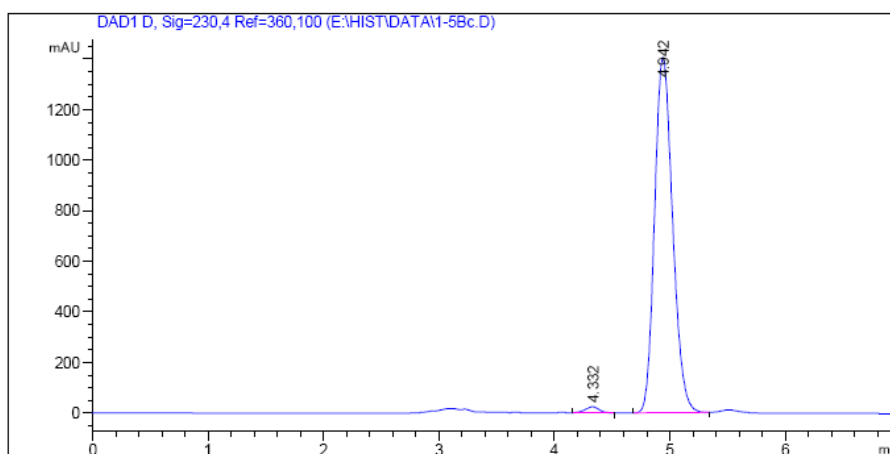

(*S*)-4-methyl-*N*-(phenyl(*m*-tolyl)methyl)benzenesulfonamide(**3ae**).<sup>[3]</sup> White solid, 101 mg, 96% yield, 98% ee, m.p. 98–99 °C.  $[\alpha]_D^{24} = -4.9$  ( $c = 0.35$ ,  $\text{CHCl}_3$ ). HPLC:

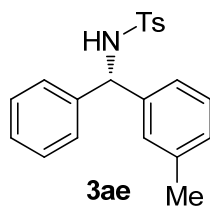

Chiralcel OD-H Column, *n*-hexane/*i*-propanol = 90/10, flow = 0.5 mL/min,  $\lambda = 230$  nm, 25 °C,  $t_R = 17.23$  min (minor) and 18.81 min (major).  $^1\text{H}$  NMR (600 MHz,  $\text{CDCl}_3$ )  $\delta$  7.55 (d,  $J = 8.3$  Hz, 2H), 7.24 – 7.17 (m, 3H), 7.15 – 7.07 (m, 5H), 6.99 (d,  $J = 7.5$  Hz, 1H), 6.89 – 6.83 (m, 2H), 5.52 (d,  $J = 7.1$  Hz, 1H), 5.09 (d,  $J = 6.7$  Hz, 1H), 2.37 (s, 3H), 2.20 (s, 3H).  $^{13}\text{C}$  NMR (150 MHz,  $\text{CDCl}_3$ )  $\delta$  143.3, 140.7, 140.5, 138.3, 137.5, 129.4, 128.6, 128.5, 128.2, 127.7, 127.5, 127.4, 124.6, 61.5, 21.6, 21.4.

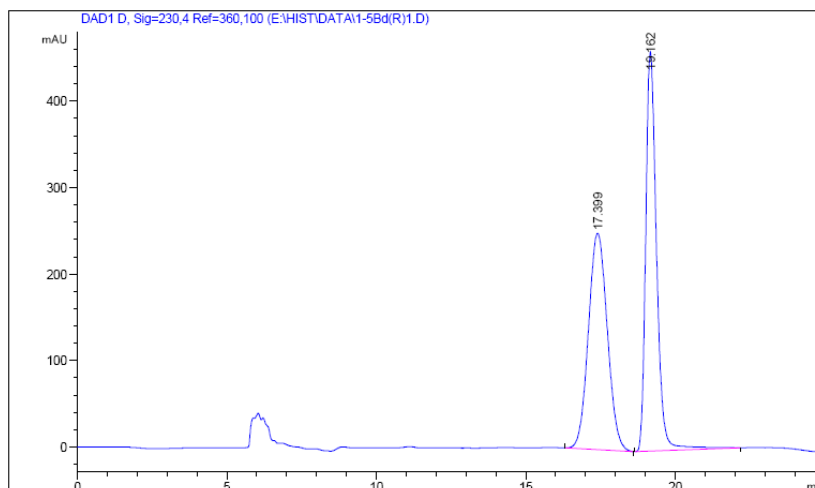

#### Results

| Peak No.     | Peak ID | Ret Time (min) | Height (mAU) | Area (mAU.s) | Conc (%) |
|--------------|---------|----------------|--------------|--------------|----------|
| 1            |         | 17.399         | 250.50386    | 1.09694e4    | 48.6416  |
| 2            |         | 19.162         | 461.51450    | 1.15821e4    | 51.3584  |
| <b>Total</b> |         |                | 712.01836    | 2.25515e4    | 100.000  |

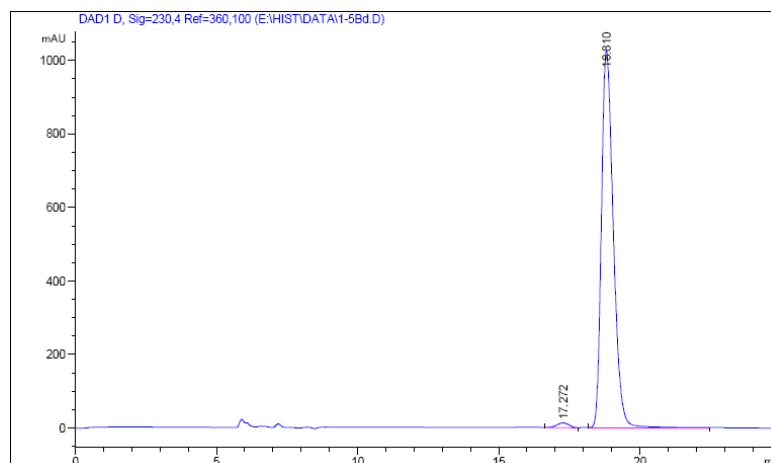

#### Results

| Peak No.     | Peak ID | Ret Time (min) | Height (mAU) | Area (mAU.s) | Conc (%) |
|--------------|---------|----------------|--------------|--------------|----------|
| 1            |         | 17.272         | 12.55040     | 377.05310    | 1.2419   |
| 2            |         | 18.810         | 1024.42297   | 2.99316e4    | 98.7581  |
| <b>Total</b> |         |                | 1036.97337   | 3.03087e4    | 100.000  |

**(S)-4-methyl-N-(phenyl(*p*-tolyl)methyl)benzenesulfonamide(3af).** <sup>[5]</sup> White solid, 103 mg, 98% yield, 98% ee, m.p. 118–121 °C.  $[\alpha]_D^{24} = -12.5$  ( $c = 1.10$ ,  $\text{CHCl}_3$ ). HPLC: Chiracel OD-H Column, *n*-hexane/*i*-propanol = 70/30, flow = 1.0 mL/min,  $\lambda = 230$  nm, 25 °C,  $t_R = 4.88$  min (major) and 5.92 min (minor). <sup>1</sup>H NMR (600 MHz,  $\text{CDCl}_3$ )  $\delta$  7.56 (d,  $J = 7.5$  Hz, 2H), 7.20 – 7.17 (m, 3H), 7.14 – 7.10 (m, 4H), 7.02 – 6.96 (m, 4H), 5.52 (d,  $J = 6.8$  Hz, 1H), 5.09 (d,  $J = 6.5$  Hz, 1H), 2.38 (s, 3H), 2.28 (s, 3H). <sup>13</sup>C NMR (150 MHz,  $\text{CDCl}_3$ )  $\delta$  143.3, 140.8, 137.8, 137.6, 127.5, 129.5, 129.4, 128.6, 127.6, 127.5, 127.4, 127.3, 61.3, 21.6, 21.1.

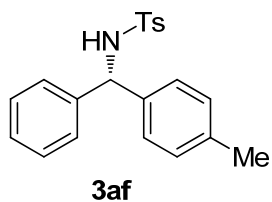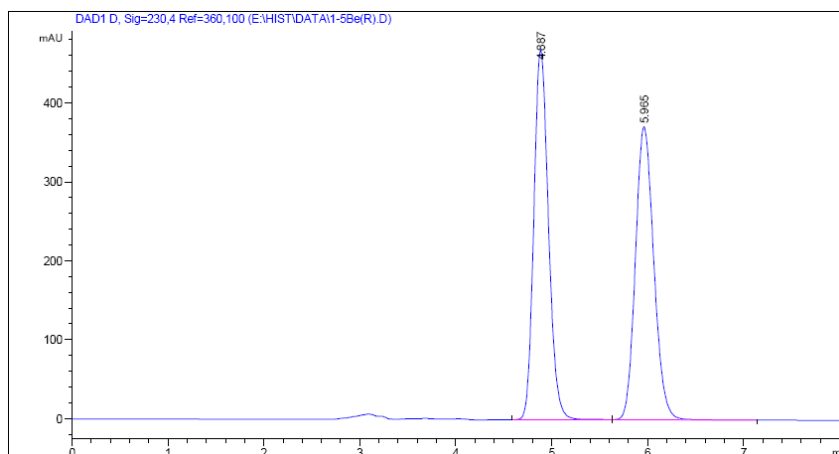

| Peak No.     | Peak ID | Ret Time (min) | Height (mAU) | Area (mAU*s) | Conc (%) |
|--------------|---------|----------------|--------------|--------------|----------|
| 1            |         | 4.887          | 468.14828    | 4955.23486   | 50.1420  |
| 2            |         | 5.965          | 370.77689    | 4927.17432   | 49.8580  |
| <b>Total</b> |         |                | 838.92517    | 9882.40918   | 100.000  |

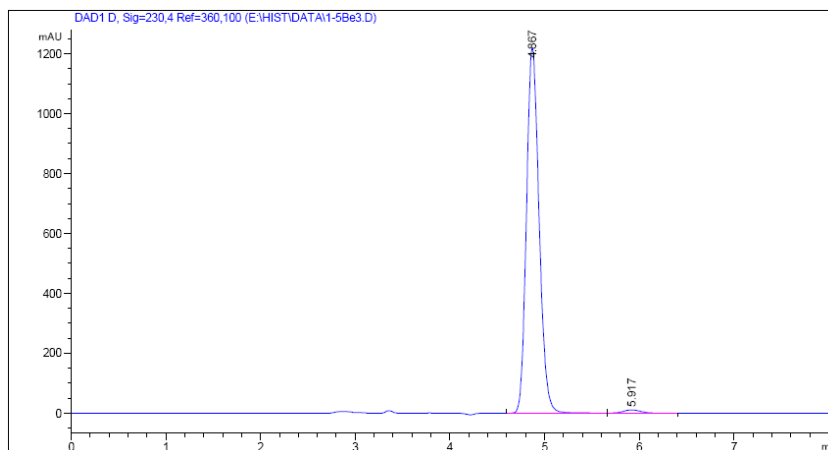

| Peak No.     | Peak ID | Ret Time (min) | Height (mAU) | Area (mAU*s) | Conc (%) |
|--------------|---------|----------------|--------------|--------------|----------|
| 1            |         | 4.867          | 1219.68604   | 1.12880e4    | 98.8272  |
| 2            |         | 5.917          | 10.92273     | 133.95137    | 1.1728   |
| <b>Total</b> |         |                | 1230.60877   | 1.14220e4    | 100.000  |



**(S)-N-((2-fluorophenyl)(phenyl)methyl)-4-methylbenzenesulfonamide(3ag).** White solid, 106

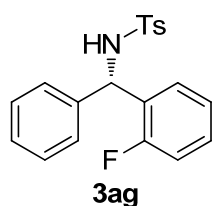

mg, 99% yield, 99% ee, m.p. 137–139 °C.  $[\alpha]_D^{24} = -8.4$  ( $c = 0.70$ ,  $\text{CHCl}_3$ ). HPLC: Chiralcel OD-H Column, *n*-hexane/*i*-propanol = 80/20, flow = 1.0 mL/min,  $\lambda = 230$  nm, 25 °C,  $t_R = 5.85$  min (minor) and 6.34 min (major).  $^1\text{H}$  NMR (600 MHz,  $\text{CDCl}_3$ )  $\delta$  7.58 (d,  $J = 8.3$  Hz, 2H), 7.27 – 7.15 (m, 5H), 7.14 – 7.11(m, 4H), 7.02 – 6.99 (m, 1H), 6.89 – 6.86 (m, 1H), 5.77 (d,  $J = 8.1$  Hz, 1H), 5.32 (d,  $J = 8.0$  Hz, 1H), 2.35 (s, 3H).  $^{13}\text{C}$  NMR (150 MHz,  $\text{CDCl}_3$ )

$\delta$  160.9, 159.3, 143.4, 139.7, 137.2, 129.6, 129.5, 129.3, 129.3, 128.8, 127.9, 127.2, 127.0, 124.4, 115.9, 115.8, 56.7, 21.6. HRMS (ESI,  $m/z$ ) calcd for  $\text{C}_{20}\text{H}_{18}\text{FNNaO}_2\text{S}$   $[\text{M} + \text{Na}]^+$  378.0940, found 378.0945.

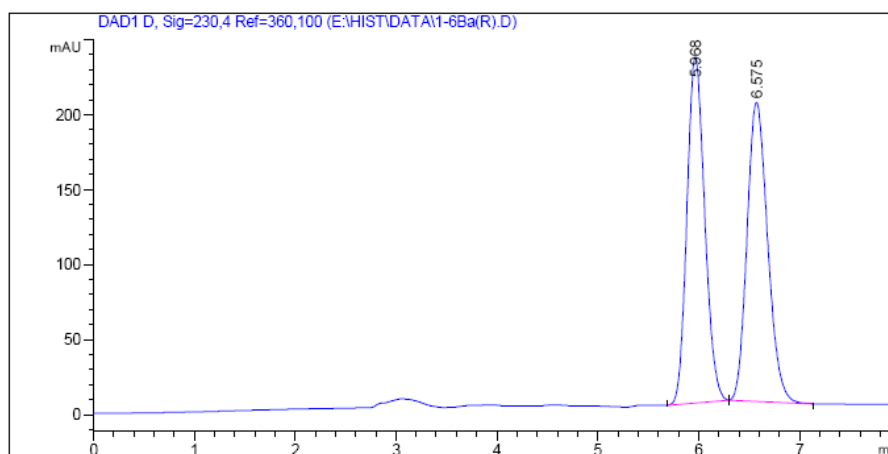

#### Results

| Peak No.     | Peak ID | Ret Time (min) | Height (mAU) | Area (mAU.s) | Conc (%). |
|--------------|---------|----------------|--------------|--------------|-----------|
| 1            |         | 5.968          | 230.51093    | 2817.04810   | 49.9355   |
| 2            |         | 6.575          | 199.38506    | 2824.33032   | 50.0645   |
| <b>Total</b> |         |                | 429.89598    | 5641.37842   | 100.000   |

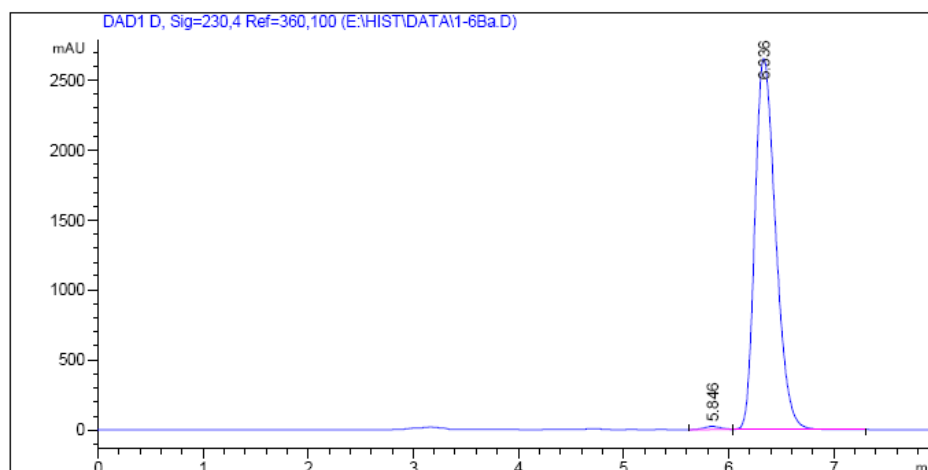

#### Results

| Peak No.     | Peak ID | Ret Time (min) | Height (mAU) | Area (mAU.s) | Conc (%). |
|--------------|---------|----------------|--------------|--------------|-----------|
| 1            |         | 5.846          | 21.09604     | 224.47066    | 0.6155    |
| 2            |         | 6.336          | 2649.77588   | 3.62460e4    | 99.3845   |
| <b>Total</b> |         |                | 2670.87192   | 3.64705e4    | 100.000   |

(*S*)-*N*-((4-chlorophenyl)(phenyl)methyl)-4-methylbenzenesulfonamide(**3ah**).<sup>[6]</sup> White solid, 110 mg, 99% yield, 98% ee, m.p. 123–125 °C.  $[\alpha]_D^{24} = -4.4$  ( $c = 0.88$ ,  $\text{CHCl}_3$ ). HPLC: Chiralcel OD-H Column, *n*-hexane/*i*-propanol = 90/10, flow = 1.0 mL/min,  $\lambda = 230$  nm, 25 °C,  $t_R = 10.23$  min (major) and 13.53 min (minor).  $^1\text{H}$  NMR (600 MHz,  $\text{CDCl}_3$ )  $\delta$  7.54 (d,  $J = 8.2$  Hz, 2H), 7.25 – 7.18 (m, 3H), 7.18 – 7.11 (m, 4H), 7.09 – 7.01 (m, 4H), 5.53 (d,  $J = 7.3$  Hz, 1H), 5.32 (d,  $J = 7.2$  Hz, 1H), 2.38 (s, 3H).  $^{13}\text{C}$  NMR (150 MHz,  $\text{CDCl}_3$ )  $\delta$  143.6, 140.2, 139.1, 137.3, 133.6, 129.6, 129.0, 128.9, 128.8, 128.0, 127.4, 127.3, 60.9, 21.6.

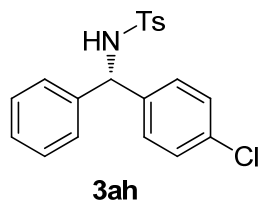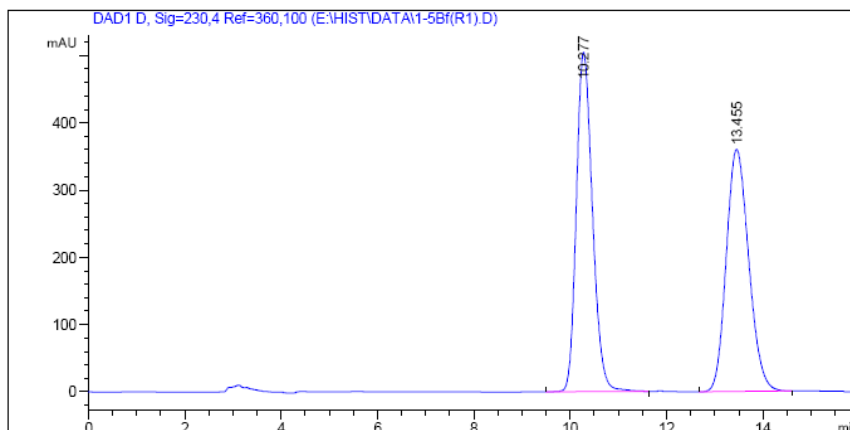

#### Results

| Peak No.     | Peak ID | Ret Time (min) | Height (mAU) | Area (mAU.s) | Conc (%) |
|--------------|---------|----------------|--------------|--------------|----------|
| 1            |         | 10.277         | 504.14920    | 1.17259e4    | 50.1806  |
| 2            |         | 13.455         | 359.83823    | 1.16415e4    | 49.8194  |
| <b>Total</b> |         |                | 863.98743    | 2.33674e4    | 100.000  |

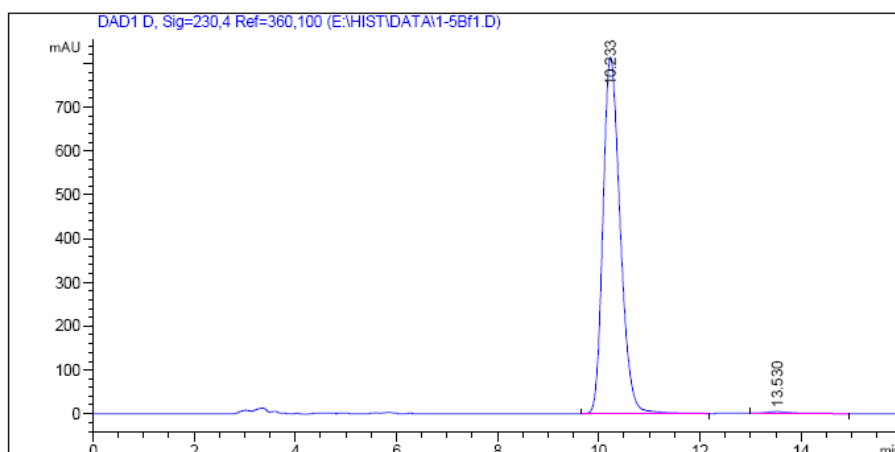

#### Results

| Peak No.     | Peak ID | Ret Time (min) | Height (mAU) | Area (mAU.s) | Conc (%) |
|--------------|---------|----------------|--------------|--------------|----------|
| 1            |         | 10.233         | 813.77356    | 1.91958e4    | 99.2356  |
| 2            |         | 13.530         | 4.29023      | 147.86830    | 0.7644   |
| <b>Total</b> |         |                | 818.06379    | 1.93436e4    | 100.000  |

(*S*)-*N*-((4-bromophenyl)(phenyl)methyl)-4-methylbenzenesulfonamide(**3ai**).<sup>[6]</sup> White solid, 123 mg, 98% yield, 98% ee, m.p. 120–122 °C.  $[\alpha]_D^{27} = -5.6$  ( $c = 0.60$ ,  $\text{CHCl}_3$ ). HPLC: Chiralcel OD-H Column, *n*-hexane/*i*-propanol = 80/20, flow = 1.0 mL/min,  $\lambda = 230$  nm, 25 °C,  $t_R = 6.78$  min (major) and 8.68 min (minor).  $^1\text{H}$  NMR (600 MHz,  $\text{CDCl}_3$ )  $\delta$  7.54 (d,  $J = 8.2$  Hz, 2H), 7.32 (d,  $J = 8.4$  Hz, 2H), 7.21 (s, 3H), 7.14 (d,  $J = 8.0$  Hz, 2H), 7.05 – 6.99 (m, 4H), 5.51 (d,  $J = 7.0$  Hz, 1H), 5.21 (d,  $J = 6.2$  Hz, 1H), 2.39 (s, 3H).  $^{13}\text{C}$  NMR (150 MHz,  $\text{CDCl}_3$ )  $\delta$  143.6, 140.1, 139.6, 137.3, 131.7, 129.6, 129.3, 128.9, 128.0, 127.4, 127.3, 121.7, 61.0, 21.6.

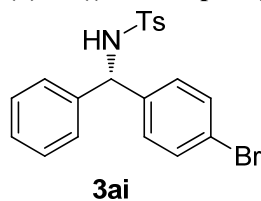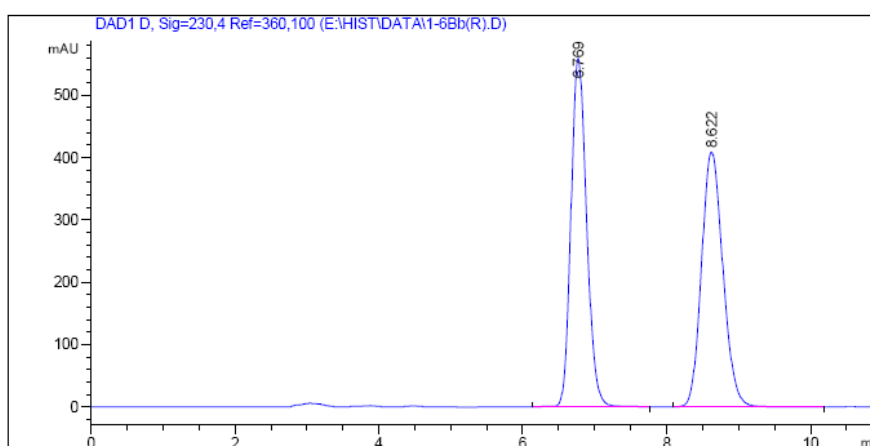

| Peak No.     | Peak ID | Ret Time (min) | Height (mAU) | Area (mAU·s) | Conc (%) |
|--------------|---------|----------------|--------------|--------------|----------|
| 1            |         | 6.769          | 558.54700    | 8447.76270   | 50.0315  |
| 2            |         | 8.622          | 408.54092    | 8437.11230   | 49.9685  |
| <b>Total</b> |         |                | 967.08792    | 1.68849e4    | 100.000  |

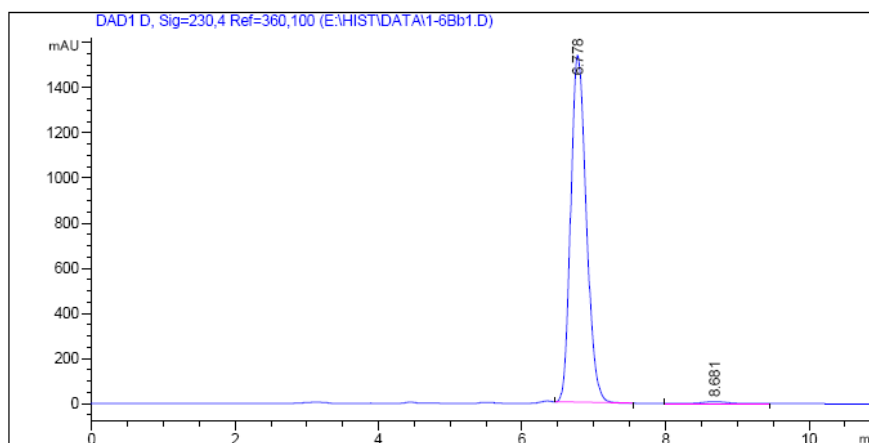

| Peak No.     | Peak ID | Ret Time (min) | Height (mAU) | Area (mAU·s) | Conc (%) |
|--------------|---------|----------------|--------------|--------------|----------|
| 1            |         | 6.778          | 1536.66309   | 2.31726e4    | 99.1365  |
| 2            |         | 8.681          | 8.99589      | 201.84566    | 0.8635   |
| <b>Total</b> |         |                | 1545.65897   | 2.33744e4    | 100.000  |

**(S)-4-methyl-N-(phenyl(3-(trifluoromethyl)phenyl)methyl)benzenesulfonamide(3aj).**<sup>[3]</sup> White solid, 116 mg, 95% yield, 99% ee, m.p. 109–110 °C.  $[\alpha]_D^{24} = +3.9$  ( $c = 0.75$ ,  $\text{CHCl}_3$ ). HPLC: Chiralcel OD-H Column, *n*-hexane/*i*-propanol = 80/20, flow = 1.0 mL/min,  $\lambda = 230$  nm, 25 °C,  $t_R = 6.17$  min (major) and 7.18 min (minor).  $^1\text{H}$  NMR (600 MHz,  $\text{CDCl}_3$ )  $\delta$  7.55 (d,  $J = 7.5$  Hz, 2H), 7.20 (s, 3H), 7.14 (d,  $J = 7.6$  Hz, 2H), 7.09 – 7.06 (m, 4H), 6.90 – 6.87 (m, 2H), 5.55 (d,  $J = 7.0$  Hz, 1H), 5.27 (s, 1H), 2.38 (s, 3H).  $^{13}\text{C}$  NMR (150 MHz,  $\text{CDCl}_3$ )  $\delta$  163.0, 161.4, 143.5, 140.4, 137.4, 136.5, 129.5, 129.3, 129.2, 128.8, 127.9, 127.4, 127.3, 115.6, 115.4, 60.8, 21.6.

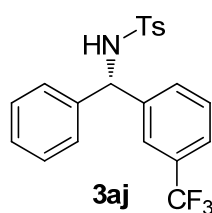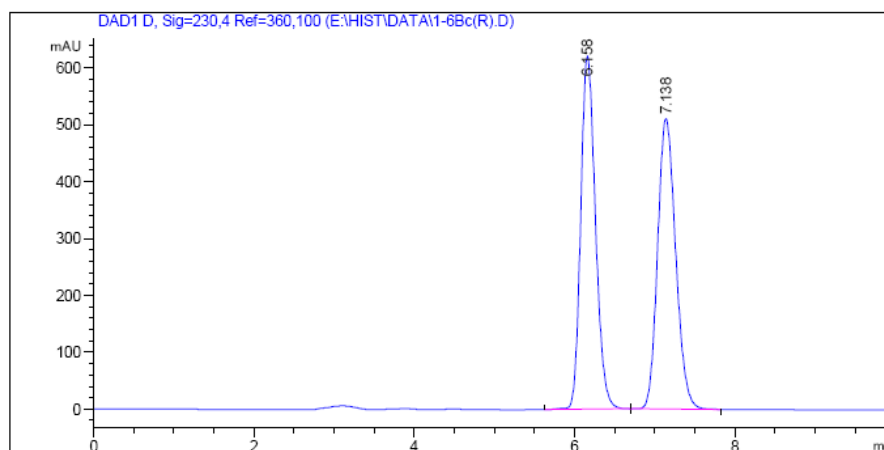

#### Results

| Peak No.     | Peak ID | Ret Time (min) | Height (mAU) | Area (mAU*s) | Conc (%) |
|--------------|---------|----------------|--------------|--------------|----------|
| 1            |         | 6.158          | 621.36182    | 7952.87744   | 49.9244  |
| 2            |         | 7.138          | 510.97720    | 7976.96973   | 50.0756  |
| <b>Total</b> |         |                | 1132.33902   | 1.59298e4    | 100.000  |

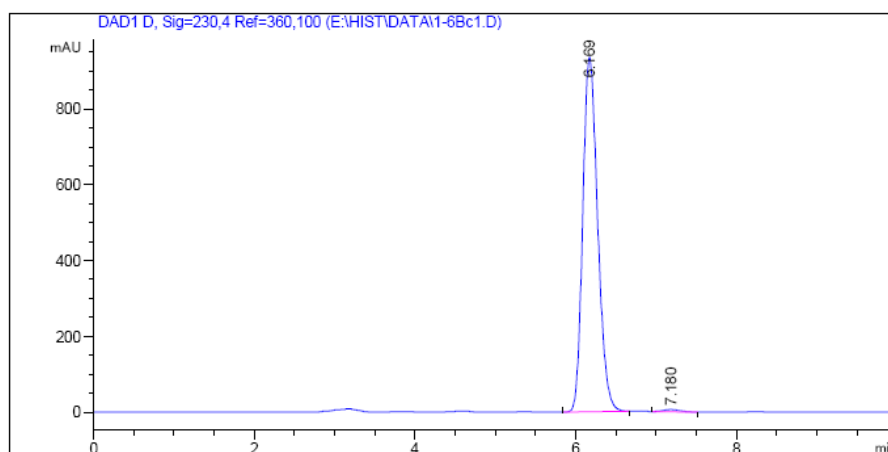

#### Results

| Peak No.     | Peak ID | Ret Time (min) | Height (mAU) | Area (mAU*s) | Conc (%) |
|--------------|---------|----------------|--------------|--------------|----------|
| 1            |         | 6.169          | 935.66437    | 1.20576e4    | 99.3103  |
| 2            |         | 7.180          | 5.86888      | 83.73341     | 0.6897   |
| <b>Total</b> |         |                | 941.53325    | 1.21413e4    | 100.000  |

**(S)-4-methyl-N-(phenyl(4-(trifluoromethyl)phenyl)methyl)benzenesulfonamide(3ak).**<sup>[10]</sup>

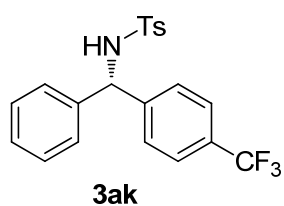

White solid, 117 mg, 96% yield, 98% ee, m.p. 138–141 °C.  $[\alpha]_D^{24} = +9.4$  ( $c = 0.82$ ,  $\text{CHCl}_3$ ). HPLC: Chiracel OD-H Column,  $n$ -hexane/ $i$ -propanol = 80/20, flow = 1.0 mL/min,  $\lambda = 230$  nm, 25 °C,  $t_R = 6.10$  min (major) and 8.58 min (minor).  $^1\text{H}$  NMR (600 MHz,  $\text{CDCl}_3$ )  $\delta$  7.53 (d,  $J = 8.2$  Hz, 2H), 7.46 – 7.40 (m, 2H), 7.29 – 7.23 (m, 2H), 7.24 – 7.19 (m, 3H), 7.10 – 7.05 (m, 4H), 5.61 (d,  $J = 7.0$  Hz, 2H), 5.51 (d,  $J = 6.9$  Hz, 2H), 2.36 (s, 3H).  $^{13}\text{C}$  NMR (150 MHz,  $\text{CDCl}_3$ )  $\delta$  144.4, 143.7, 139.9, 137.2, 129.5, 129.0, 128.2, 127.9, 127.4, 127.3, 125.5 (q,  $J = 3.8$  Hz), 61.1, 21.5.

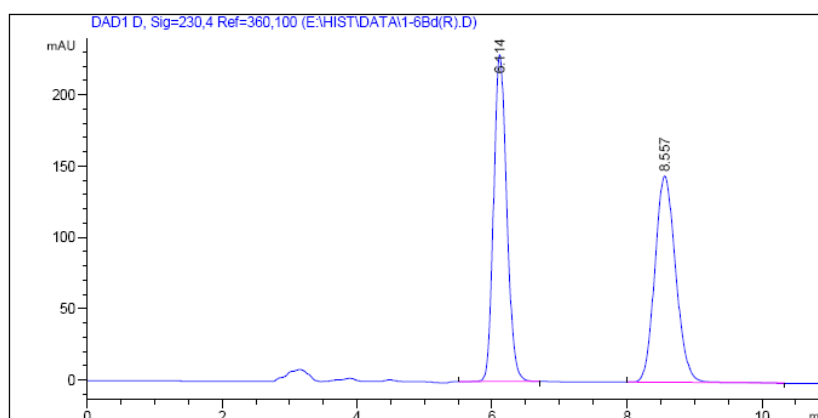

**Results**

| Peak No.     | Peak ID | Ret Time (min) | Height (mAU) | Area (mAU.s) | Conc (%) |
|--------------|---------|----------------|--------------|--------------|----------|
| 1            |         | 6.114          | 229.04887    | 3100.80640   | 49.9748  |
| 2            |         | 8.557          | 144.54916    | 3103.93848   | 50.0252  |
| <b>Total</b> |         |                | 373.59804    | 6204.74487   | 100.000  |

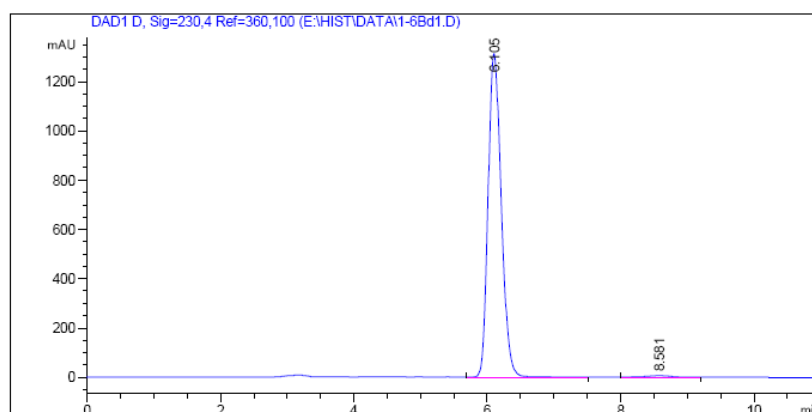

**Results**

| Peak No.     | Peak ID | Ret Time (min) | Height (mAU) | Area (mAU.s) | Conc (%) |
|--------------|---------|----------------|--------------|--------------|----------|
| 1            |         | 6.105          | 1314.38757   | 1.80017e4    | 99.0994  |
| 2            |         | 8.581          | 6.69849      | 163.58929    | 0.9006   |
| <b>Total</b> |         |                | 1321.08607   | 1.81653e4    | 100.000  |

**(S)-N-((4-(tert-butyl)phenyl)(phenyl)methyl)-4-methylbenzenesulfonamide(3al)**. White solid, 111 mg, 94% yield, 98% ee, m.p. 124–126 °C.  $[\alpha]_D^{25} = -10.2$  ( $c = 0.80$ ,  $\text{CHCl}_3$ ). HPLC: Chiracel OD-H Column, *n*-hexane/*i*-propanol = 70/30, flow = 1.0 mL/min,  $\lambda = 230$  nm, 25 °C,  $t_R = 5.52$  min (major) and 11.61 min (minor).  $^1\text{H}$  NMR (600 MHz,  $\text{CDCl}_3$ )  $\delta$  7.53 (d,  $J = 7.5$  Hz, 2H), 7.19 – 7.18 (m,  $J = 6.3$  Hz, 5H), 7.13 (d,  $J = 6.6$  Hz, 2H), 7.09 (d,  $J = 7.8$  Hz, 2H), 6.99 (d,  $J = 7.6$  Hz, 2H), 5.55 (d,  $J = 7.0$  Hz, 1H), 5.34 – 5.27 (m, 1H), 2.35 (s, 3H), 1.25 (s, 9H).  $^{13}\text{C}$  NMR (150 MHz,  $\text{CDCl}_3$ )  $\delta$  150.6, 143.1, 140.8, 137.6, 137.5, 129.4, 128.6, 127.6, 127.3, 127.2, 125.5, 61.2, 34.5, 31.4, 21.6. HRMS (ESI,  $m/z$ ) calcd for  $\text{C}_{24}\text{H}_{27}\text{NNaO}_2\text{S} [\text{M} + \text{Na}]^+$  416.1660, found 416.1662.

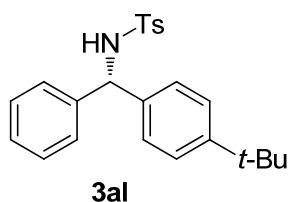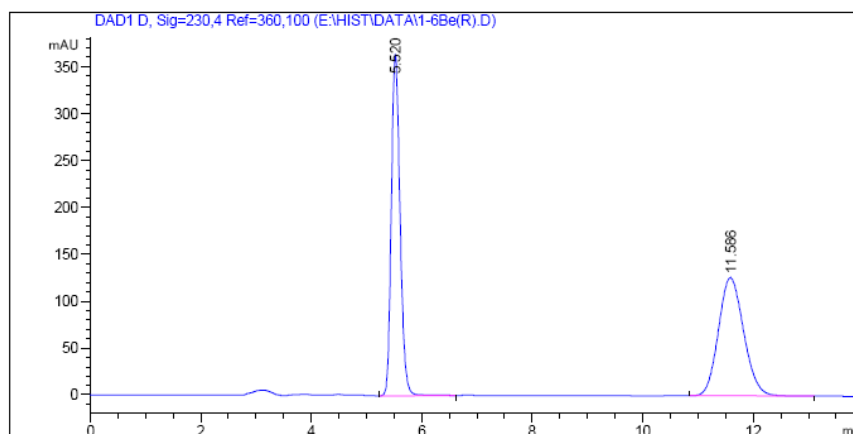

#### Results

| Peak No.     | Peak ID | Ret Time (min) | Height (mAU) | Area (mAU·s) | Conc (%) |
|--------------|---------|----------------|--------------|--------------|----------|
| 1            |         | 5.520          | 364.21729    | 4016.30127   | 50.1308  |
| 2            |         | 11.586         | 125.94168    | 3995.34766   | 49.8692  |
| <b>Total</b> |         |                | 490.15897    | 8011.64893   | 100.000  |

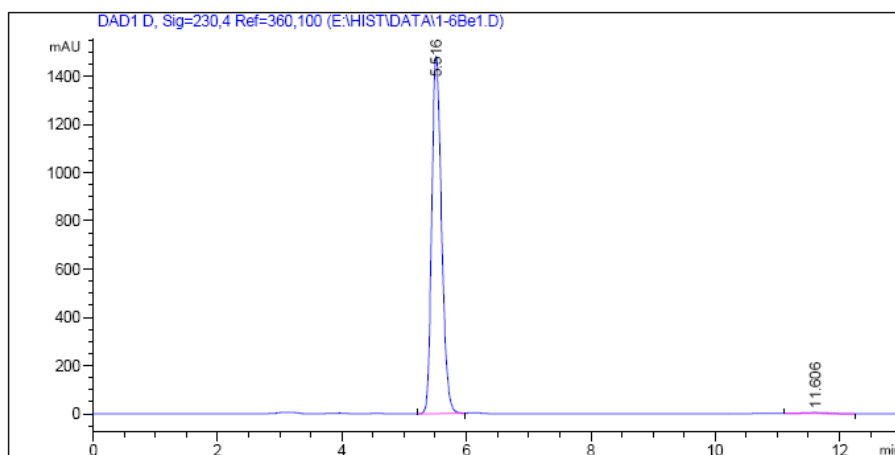

#### Results

| Peak No.     | Peak ID | Ret Time (min) | Height (mAU) | Area (mAU·s) | Conc (%) |
|--------------|---------|----------------|--------------|--------------|----------|
| 1            |         | 5.516          | 1481.52673   | 1.62518e4    | 99.2291  |
| 2            |         | 11.606         | 4.34759      | 126.25610    | 0.7709   |
| <b>Total</b> |         |                | 1485.87432   | 1.63781e4    | 100.000  |

(*S*)-4-methyl-*N*-(naphthalen-1-yl(phenyl)methyl)benzenesulfonamide(**3am**).<sup>[5]</sup> White solid, 90%

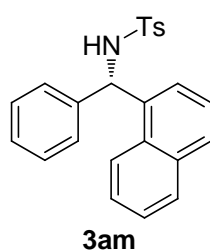

yield, 105 mg, 98% ee, m.p. 174–176 °C.  $[\alpha]_D^{27} = -4.8$  ( $c = 0.95$ ,  $\text{CHCl}_3$ ). HPLC: Chiralcel OD-H Column, *n*-hexane/*i*-propanol = 80/20, flow = 1.0 mL/min,  $\lambda = 230$  nm, 25 °C,  $t_R = 11.22$  min (minor) and 12.56 min (major).  $^1\text{H}$  NMR (400 MHz,  $\text{CDCl}_3$ )  $\delta$  7.82 – 7.79 (m, 2H), 7.72 (d,  $J = 8.0$  Hz, 1H), 7.50 (d,  $J = 8.2$  Hz, 2H), 7.46 – 7.36 (m, 2H), 7.29 – 7.23 (m, 2H), 7.20 – 7.17 (m, 3H), 7.15 – 7.11 (m, 2H), 7.05 (d,  $J = 8.1$  Hz, 2H), 6.31 (d,  $J = 7.1$  Hz, 1H), 5.19 (d,  $J = 7.1$  Hz, 1H), 2.34 (s, 3H).  $^{13}\text{C}$  NMR (100 MHz,  $\text{CDCl}_3$ )  $\delta$  143.3, 140.3, 137.4, 135.6, 134.1, 130.6, 129.4, 129.0, 128.8, 127.8, 127.6, 127.3, 126.7, 126.3, 125.9, 125.2, 123.5, 58.7, 21.6.

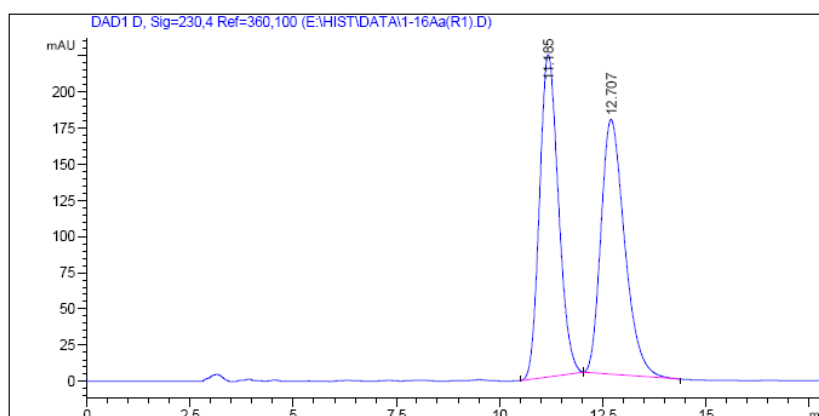

#### Results

| Peak No.     | Peak ID | Ret Time (min) | Height (mAU) | Area (mAU·s) | Conc (%) |
|--------------|---------|----------------|--------------|--------------|----------|
| 1            |         | 11.185         | 222.84117    | 7076.34326   | 50.2239  |
| 2            |         | 12.707         | 176.09012    | 7013.23828   | 49.7761  |
| <b>Total</b> |         |                | 398.93129    | 1.40896e4    | 100.000  |

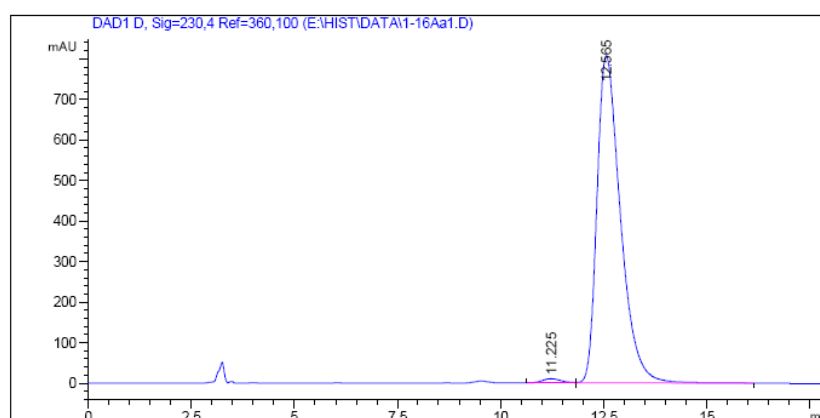

#### Results

| Peak No.     | Peak ID | Ret Time (min) | Height (mAU) | Area (mAU·s) | Conc (%) |
|--------------|---------|----------------|--------------|--------------|----------|
| 1            |         | 11.225         | 10.05758     | 303.97372    | 0.9480   |
| 2            |         | 12.565         | 806.39563    | 3.17605e4    | 99.0520  |
| <b>Total</b> |         |                | 816.45321    | 3.20645e4    | 100.000  |

**(S)-N-((3,4-dimethylphenyl)(phenyl)methyl)-4-methylbenzenesulfonamide(3an).** White solid, 100 mg, 91% yield, 96% ee, m.p. 109–112 °C.  $[\alpha]_D^{25} = -8.2$  ( $c = 0.80$ ,  $\text{CHCl}_3$ ). HPLC: Chiralcel OD-H Column, *n*-hexane/*i*-propanol = 80/20, flow = 1.0 mL/min,  $\lambda = 230$  nm, 25 °C,  $t_R = 6.47$  min (major) and 7.16 min (minor).  $^1\text{H}$  NMR (600 MHz,  $\text{CDCl}_3$ )  $\delta$  7.55 (d,  $J = 8.2$  Hz, 2H), 7.24 – 7.15 (m, 3H), 7.13 – 7.10 (m, 4H), 6.99 – 6.92 (m, 1H), 6.78 (d,  $J = 5.6$  Hz, 2H), 5.49 (d,  $J = 7.0$  Hz, 1H), 5.12 (d,  $J = 7.0$  Hz, 1H), 2.37 (s, 3H), 2.17 (s, 3H), 2.10 (s, 3H).  $^{13}\text{C}$  NMR (150 MHz,  $\text{CDCl}_3$ )  $\delta$  143.2, 140.9, 138.1, 137.6, 136.8, 136.1, 129.9, 129.4, 128.7, 128.6, 127.4, 127.3, 127.2, 124.9, 61.3, 21.6, 19.8, 19.5. HRMS (ESI,  $m/z$ ) calcd for  $\text{C}_{22}\text{H}_{23}\text{NNaO}_2\text{S}$   $[\text{M} + \text{Na}]^+$  388.1347, found 388.1351.

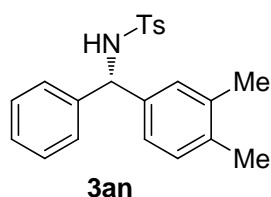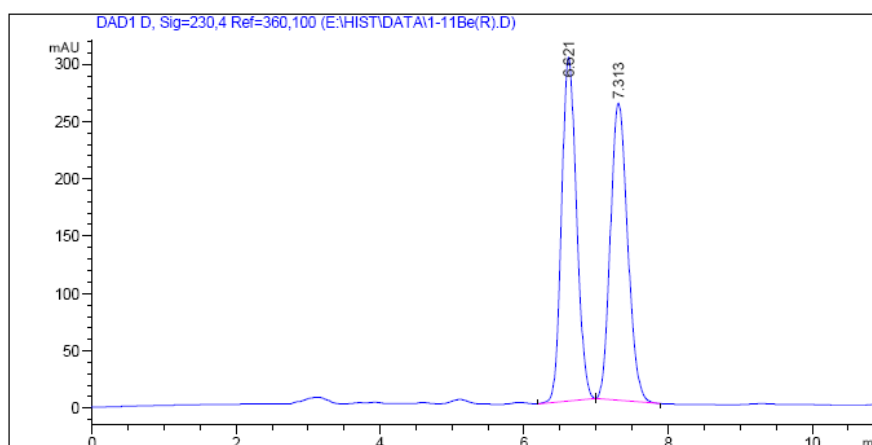

#### Results

| Peak No.     | Peak ID | Ret Time (min) | Height (mAU) | Area (mAU*s) | Conc (%) |
|--------------|---------|----------------|--------------|--------------|----------|
| 1            |         | 6.621          | 299.76224    | 4317.64355   | 50.0435  |
| 2            |         | 7.313          | 259.07275    | 4310.13867   | 49.9565  |
| <b>Total</b> |         |                | 558.83499    | 8627.78223   | 100.000  |

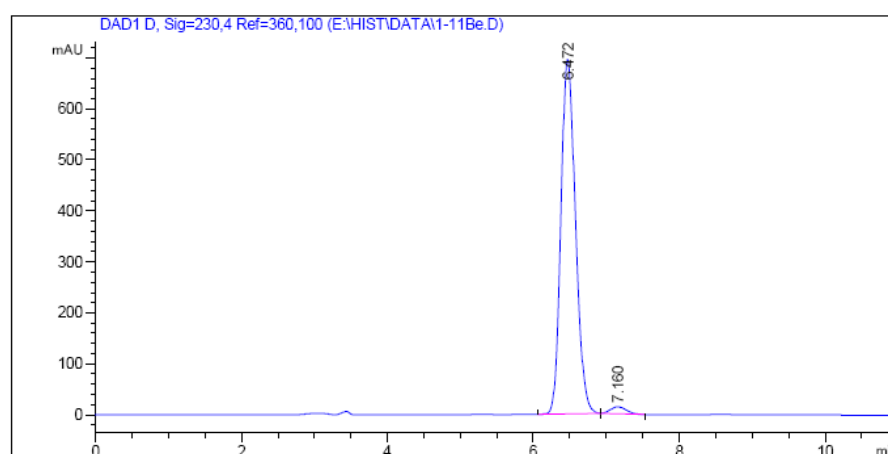

#### Results

| Peak No.     | Peak ID | Ret Time (min) | Height (mAU) | Area (mAU*s) | Conc (%) |
|--------------|---------|----------------|--------------|--------------|----------|
| 1            |         | 6.472          | 694.70880    | 9644.75781   | 97.9510  |
| 2            |         | 7.160          | 13.66240     | 201.75311    | 2.0490   |
| <b>Total</b> |         |                | 708.37121    | 9846.51093   | 100.000  |



(*S*)-*N*-((3,4-dimethoxyphenyl)(phenyl)methyl)-4-methylbenzenesulfonamide(**3ao**).<sup>[9]</sup> White solid, 110 mg, 92% yield, 96% ee, m.p. 142–144 °C.  $[\alpha]_D^{25} = -18.5$  ( $c = 1.00$ ,  $\text{CHCl}_3$ ). HPLC: Chiracel AD-H Column, *n*-hexane/*i*-propanol = 80/20, flow = 1.0 mL/min,  $\lambda = 230$  nm, 25 °C,  $t_R = 12.77$  min (major) and 17.53 min (minor).  $^1\text{H}$  NMR (400 MHz,  $\text{CDCl}_3$ )  $\delta$  7.56 (d,  $J = 7.8$  Hz, 2H), 7.24 – 7.19 (m, 3H), 7.14 – 7.12 (m, 4H), 6.68 – 6.66 (m, 1H), 6.59 – 6.57 (m, 2H), 5.53 (d,  $J = 7.2$  Hz, 1H), 5.31 (d,  $J = 7.1$  Hz, 1H), 3.81 (s, 3H), 3.69 (s, 3H), 2.37 (s, 3H).  $^{13}\text{C}$  NMR (100 MHz,  $\text{CDCl}_3$ )  $\delta$  149.0, 148.5, 143.2, 140.8, 137.6, 133.2, 129.4, 128.6, 127.6, 127.3, 119.9, 110.9, 110.6, 61.2, 56.0, 55.8, 21.5.

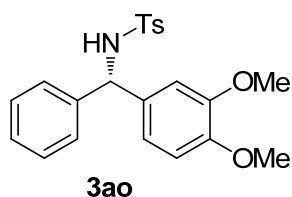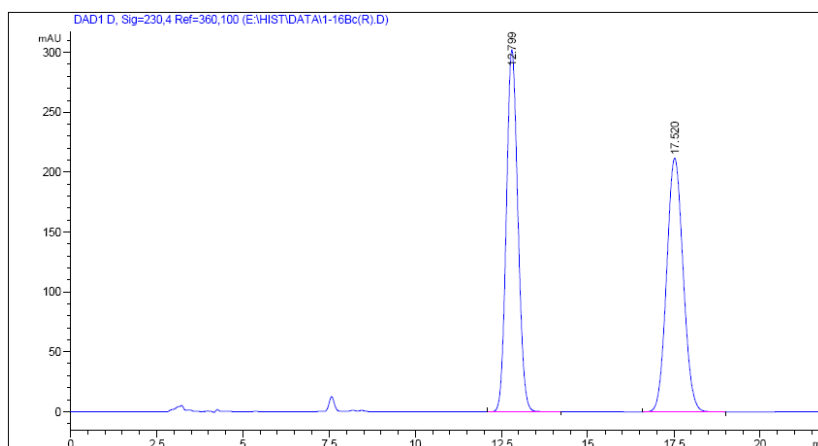

| Peak No.     | Peak ID | Ret Time (min) | Height (mAU) | Area (mAU*s) | Conc (%) |
|--------------|---------|----------------|--------------|--------------|----------|
| 1            |         | 12.799         | 302.15225    | 7040.13770   | 49.9750  |
| 2            |         | 17.520         | 211.87657    | 7047.18457   | 50.0250  |
| <b>Total</b> |         |                | 514.02882    | 1.40873e4    | 100.000  |

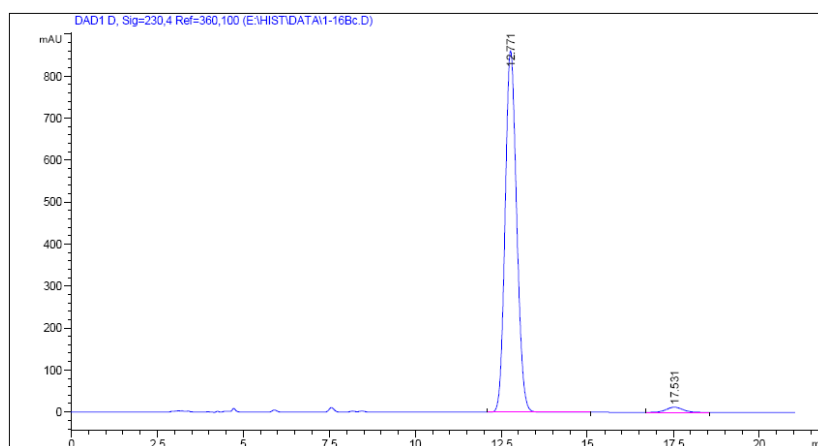

| Peak No.     | Peak ID | Ret Time (min) | Height (mAU) | Area (mAU*s) | Conc (%) |
|--------------|---------|----------------|--------------|--------------|----------|
| 1            |         | 12.771         | 860.65210    | 2.00701e4    | 98.0325  |
| 2            |         | 17.531         | 12.10685     | 402.80875    | 1.9675   |
| <b>Total</b> |         |                | 872.75895    | 2.04729e4    | 100.000  |

**(R)-4-methyl-N-(naphthalen-1-yl(phenyl)methyl)benzenesulfonamide(3bp).**<sup>[5]</sup> White solid, 97% yield, 113 mg, 99% ee, m.p. 175–177 °C.  $[\alpha]_D^{20} = +5.0$  ( $c = 1.00$ ,  $\text{CHCl}_3$ ).

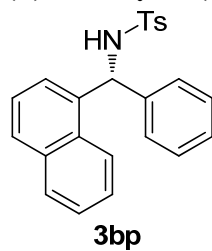

Characterization data is the same with **3am** (with a reverse configuration of **3am**). HPLC: Chiracel OD-H Column, *n*-hexane/*i*-propanol = 80/20, flow = 1.0 mL/min,  $\lambda = 230$  nm, 25 °C,  $t_R = 11.3$  min (major) and 12.96 min (minor).

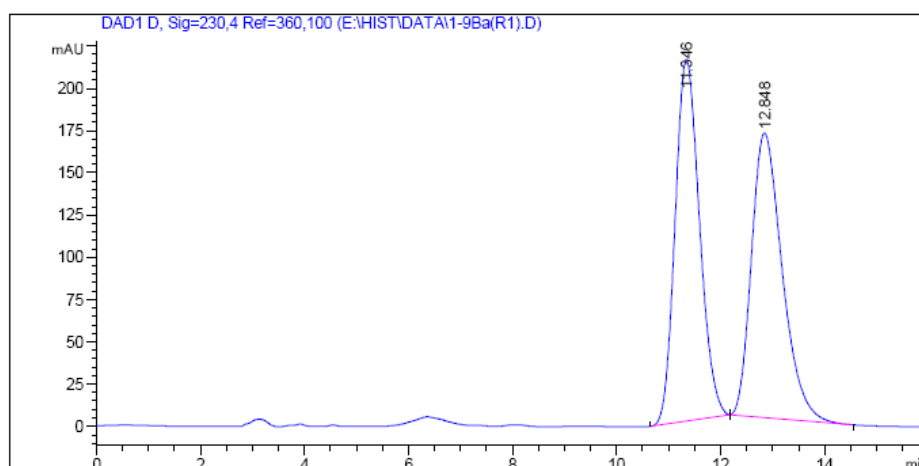

#### Results

| Peak No.     | Peak ID | Ret Time (min) | Height (mAU) | Area (mAU.s) | Conc (%). |
|--------------|---------|----------------|--------------|--------------|-----------|
| 1            |         | 11.346         | 213.97372    | 6967.26270   | 50.2220   |
| 2            |         | 12.848         | 168.41354    | 6905.66797   | 49.7780   |
| <b>Total</b> |         |                | 382.38727    | 1.38729e4    | 100.000   |

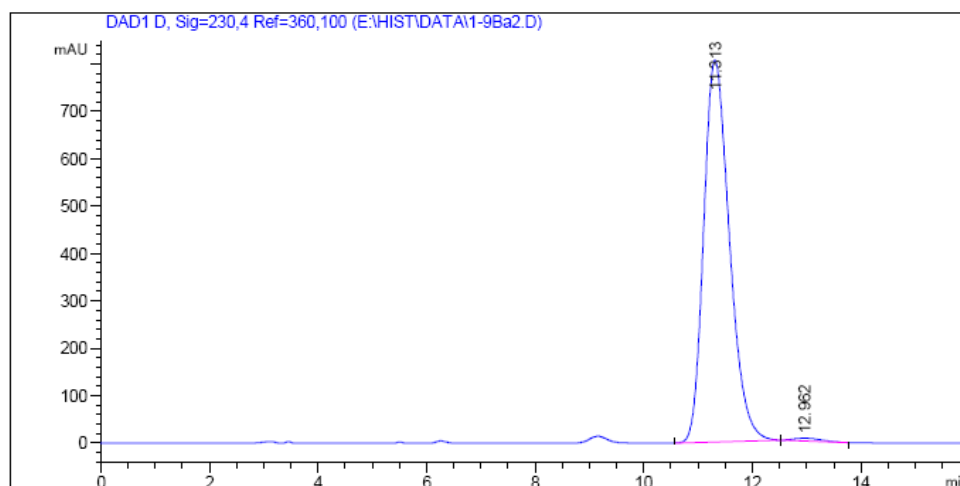

#### Results

| Peak No.     | Peak ID | Ret Time (min) | Height (mAU) | Area (mAU.s) | Conc (%). |
|--------------|---------|----------------|--------------|--------------|-----------|
| 1            |         | 11.313         | 806.08911    | 2.65397e4    | 99.2748   |
| 2            |         | 12.962         | 5.55978      | 193.88078    | 0.7252    |
| <b>Total</b> |         |                | 811.64889    | 2.67336e4    | 100.000   |

**(R)-N-((2-methoxyphenyl)(phenyl)methyl)-4-methylbenzenesulfonamide(3cp).**<sup>[5]</sup> White solid, 105 mg, 95% yield, 98% ee, m.p. 120–122 °C.  $[\alpha]_D^{24} = +29.1$  ( $c = 1.00$ ,  $\text{CHCl}_3$ ). Characterization data is the same with **3ab** (with a reverse configuration of **3ab**). HPLC: Chiracel OD-H Column, *n*-hexane/*i*-propanol = 80/20, flow = 1.0 mL/min,  $\lambda = 230$  nm, 25 °C,  $t_R = 6.24$  min (major) and 7.12 min (minor).

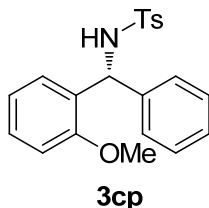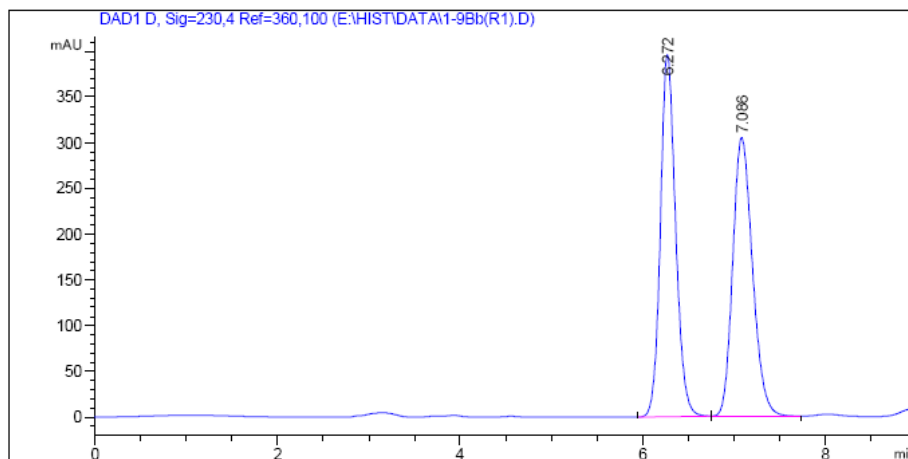

#### Results

| Peak No.     | Peak ID | Ret Time (min) | Height (mAU) | Area (mAU.s) | Conc (%) |
|--------------|---------|----------------|--------------|--------------|----------|
| 1            |         | 6.272          | 395.81021    | 4582.38281   | 50.0084  |
| 2            |         | 7.086          | 304.54929    | 4580.83936   | 49.9916  |
| <b>Total</b> |         |                | 700.35950    | 9163.22217   | 100.000  |

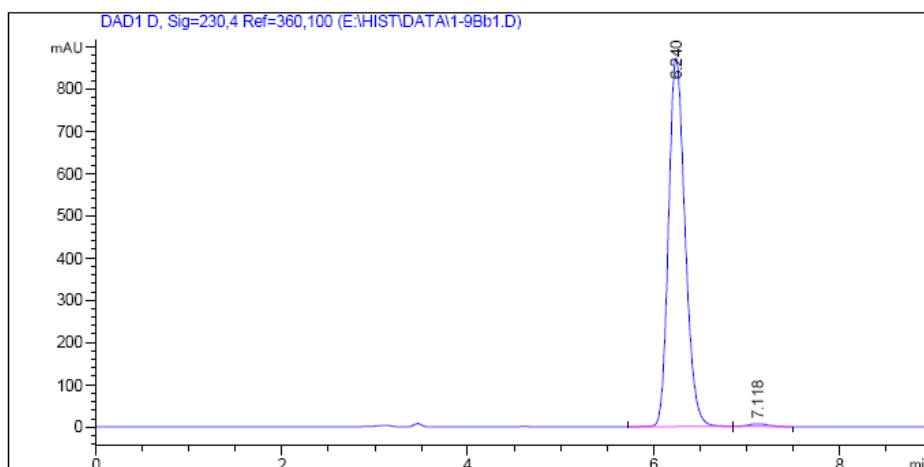

#### Results

| Peak No.     | Peak ID | Ret Time (min) | Height (mAU) | Area (mAU.s) | Conc (%) |
|--------------|---------|----------------|--------------|--------------|----------|
| 1            |         | 6.240          | 872.05170    | 1.07945e4    | 99.1262  |
| 2            |         | 7.118          | 6.65698      | 95.15427     | 0.8738   |
| <b>Total</b> |         |                | 878.70868    | 1.08896e4    | 100.000  |

**(R)-N-((4-methoxyphenyl)(phenyl)methyl)-4-methylbenzenesulfonamide(3dp).**<sup>[6]</sup> White solid, 106 mg, 96% yield, 99% ee, m.p. 132–134 °C.  $[\alpha]_D^{26} = +15.1$  ( $c = 0.57$ ,  $\text{CHCl}_3$ ). Characterization data is the same with **3aa** (with a reverse configuration of **3aa**). HPLC: Chiracel OD-H Column, *n*-hexane/*i*-propanol = 70/30, flow = 1.0 mL/min,  $\lambda = 230$  nm, 25 °C,  $t_R = 6.14$  min (minor) and 8.33 min (major).

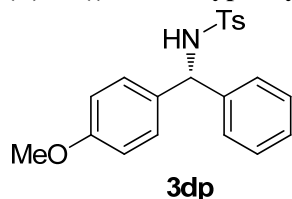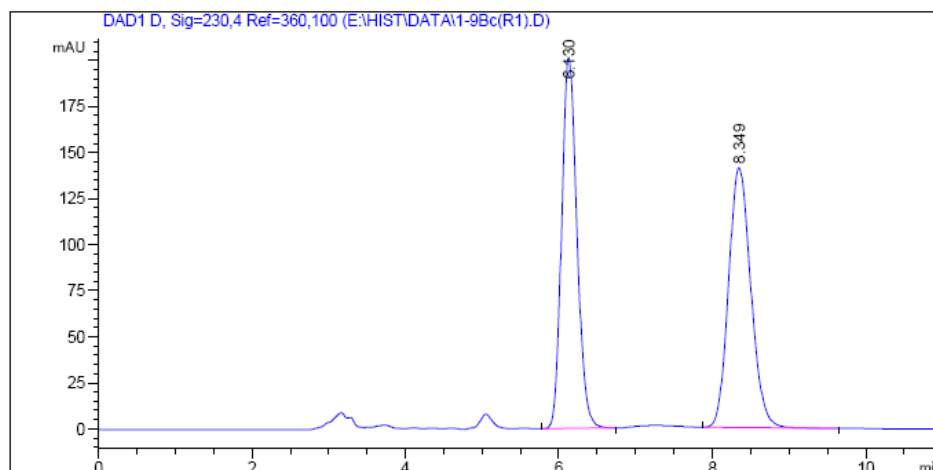

#### Results

| Peak No.     | Peak ID | Ret Time (min) | Height (mAU) | Area (mAU·s) | Conc (%). |
|--------------|---------|----------------|--------------|--------------|-----------|
| 1            |         | 6.130          | 201.46455    | 2789.05493   | 49.4966   |
| 2            |         | 8.349          | 140.97107    | 2845.79199   | 50.5034   |
| <b>Total</b> |         |                | 342.43562    | 5634.84692   | 100.000   |

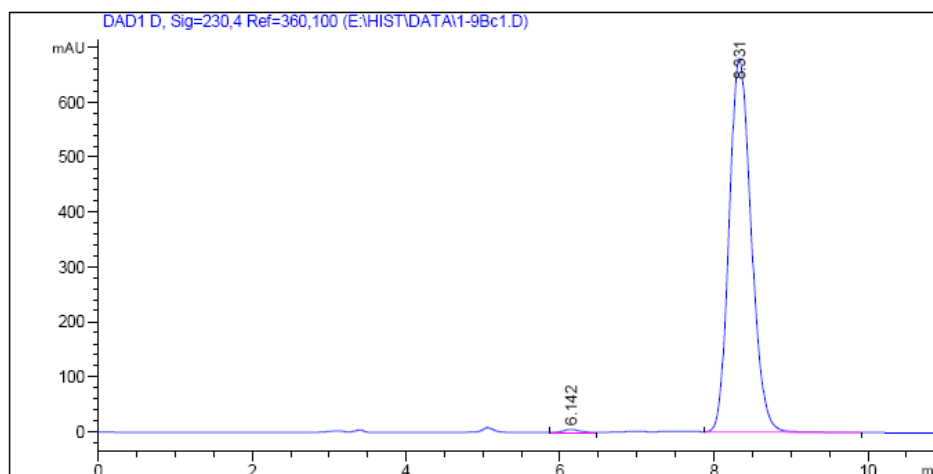

#### Results

| Peak No.     | Peak ID | Ret Time (min) | Height (mAU) | Area (mAU·s) | Conc (%). |
|--------------|---------|----------------|--------------|--------------|-----------|
| 1            |         | 6.142          | 5.51340      | 75.47466     | 0.5541    |
| 2            |         | 8.331          | 680.11841    | 1.35446e4    | 99.4459   |
| <b>Total</b> |         |                | 685.63181    | 1.36200e4    | 100.000   |

**(R)-4-methyl-N-(phenyl(*p*-tolyl)methyl)benzenesulfonamide(3ep).**<sup>[5]</sup> White solid, 100 mg, 95% yield, 97% ee, m.p. 119–120 °C.  $[\alpha]_D^{24} = + 11.8$  ( $c = 0.75$ ,  $\text{CHCl}_3$ ). Characterization data is the same with **3af** (with a reverse configuration of **3af**). HPLC: Chiralcel OD-H Column, *n*-hexane/*i*-propanol = 70/30, flow = 1.0 mL/min,  $\lambda = 230$  nm, 25 °C,  $t_R = 4.99$  min (minor) and 6.07 min (major).

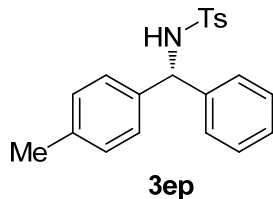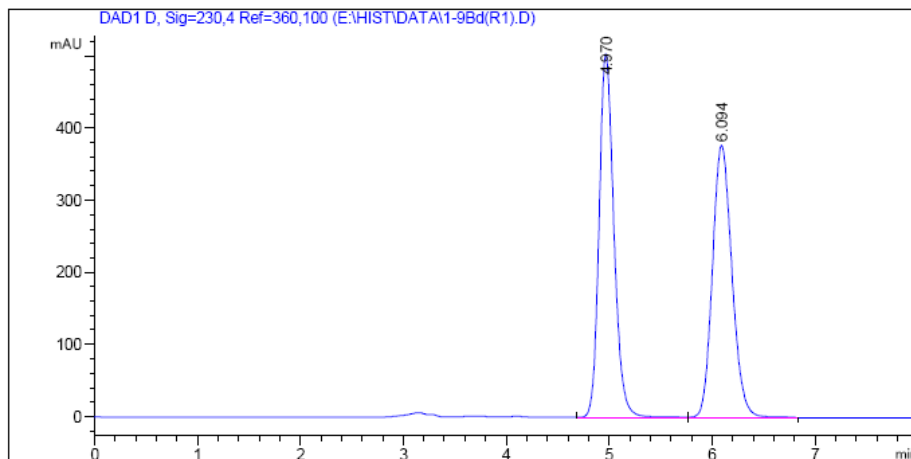

#### Results

| Peak No.     | Peak ID | Ret Time (min) | Height (mAU) | Area (mAU.s) | Conc (%). |
|--------------|---------|----------------|--------------|--------------|-----------|
| 1            |         | 4.970          | 503.61029    | 5027.95410   | 50.4563   |
| 2            |         | 6.094          | 376.82278    | 4937.00635   | 49.5437   |
| <b>Total</b> |         |                | 880.43307    | 9964.96045   | 100.000   |

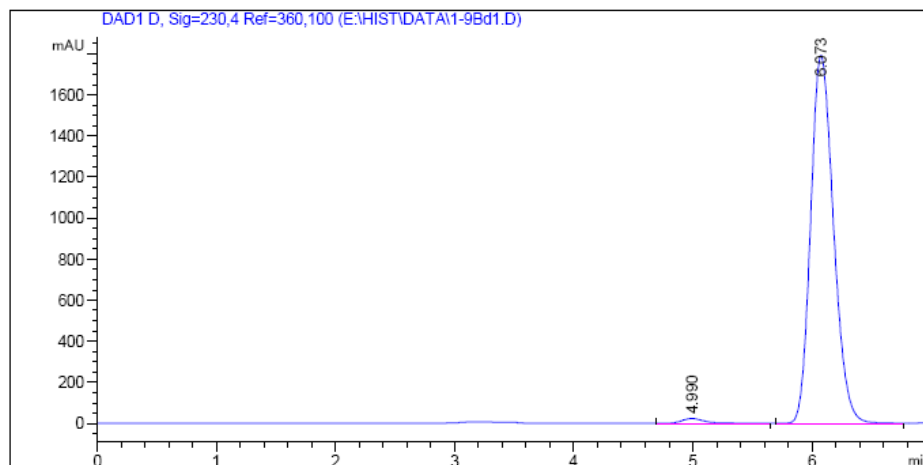

#### Results

| Peak No.     | Peak ID | Ret Time (min) | Height (mAU) | Area (mAU.s) | Conc (%). |
|--------------|---------|----------------|--------------|--------------|-----------|
| 1            |         | 4.990          | 23.47141     | 326.46097    | 1.3512    |
| 2            |         | 6.073          | 1790.65210   | 2.38351e4    | 98.6488   |
| <b>Total</b> |         |                | 1814.12350   | 2.41616e4    | 100.000   |

**(R)-N-((4-bromophenyl)(phenyl)methyl)-4-methylbenzenesulfonamide(3fp).**<sup>[6]</sup> White solid,

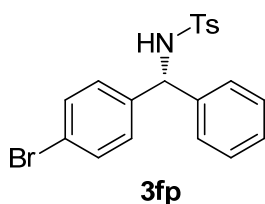

122 mg, 97% yield, 98% ee, m.p. 119–120 °C.  $[\alpha]_D^{27} = +7.9$  ( $c = 0.65$ ,  $\text{CHCl}_3$ ). Characterization data is the same with **3ai** (with a reverse configuration of **3ai**). HPLC: Chiracel OD-H Column,  $n$ -hexane/ $i$ -propanol = 80/20, flow = 1.0 mL/min,  $\lambda = 230$  nm, 25 °C,  $t_R = 6.95$  min (minor) and 8.93 min (major).

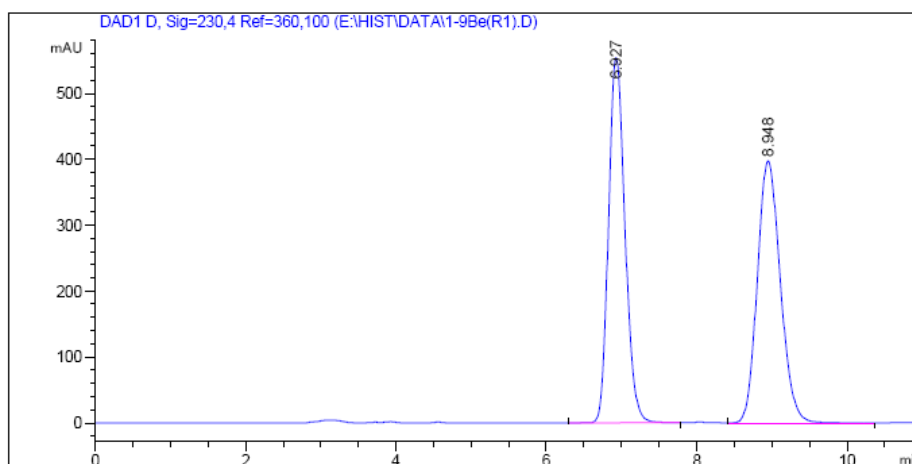

#### Results

| Peak No.     | Peak ID | Ret Time (min) | Height (mAU) | Area (mAU.s) | Conc (%) |
|--------------|---------|----------------|--------------|--------------|----------|
| 1            |         | 6.927          | 553.46588    | 8438.40820   | 49.9928  |
| 2            |         | 8.948          | 397.28143    | 8440.83496   | 50.0072  |
| <b>Total</b> |         |                | 950.74731    | 1.68792e4    | 100.000  |

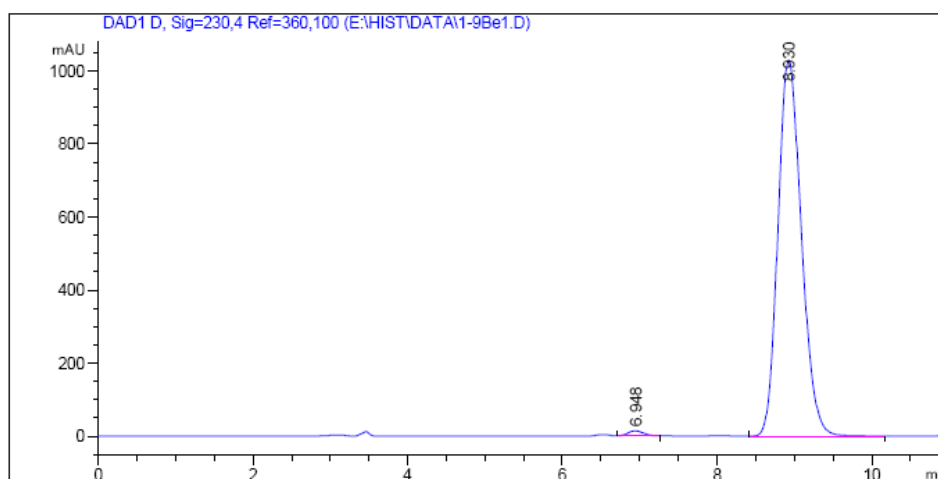

#### Results

| Peak No.     | Peak ID | Ret Time (min) | Height (mAU) | Area (mAU.s) | Conc (%) |
|--------------|---------|----------------|--------------|--------------|----------|
| 1            |         | 6.948          | 13.60280     | 188.75549    | 0.8641   |
| 2            |         | 8.930          | 1028.25061   | 2.16562e4    | 99.1359  |
| <b>Total</b> |         |                | 1041.85341   | 2.18450e4    | 100.000  |

**(R)-N-((2-chlorophenyl)(phenyl)methyl)-4-methylbenzenesulfonamide(3gp).**<sup>[5]</sup> White solid, 106 mg, 95% yield, 97% ee, m.p. 165–167 °C.  $[\alpha]_D^{25} = -23.5$  ( $c = 0.20$ ,  $\text{CHCl}_3$ ). HPLC: Chiralcel OD-H Column, *n*-hexane/*i*-propanol = 90/10, flow = 1.0 mL/min,  $\lambda = 230$  nm, 25 °C,  $t_R = 9.34$  min (major) and 10.05 min (minor).  $^1\text{H NMR}$  (400 MHz,  $\text{CDCl}_3$ )  $\delta$  7.61 (d,  $J = 8.2$  Hz, 2H), 7.35 – 7.32 (m, 1H), 7.26 – 7.19 (m, 4H), 7.20 – 7.11 (m, 4H), 7.11 – 7.03 (m, 2H), 5.91 (d,  $J = 7.2$  Hz, 1H), 5.30 (d,  $J = 7.1$  Hz, 1H), 2.38 (s, 3H).  $^{13}\text{C NMR}$  (100 MHz,  $\text{CDCl}_3$ )  $\delta$  143.5, 139.4, 137.6, 137.0, 132.9, 130.0, 129.5, 129.0, 128.8, 128.0, 127.39, 127.36, 127.1, 58.8, 21.6.

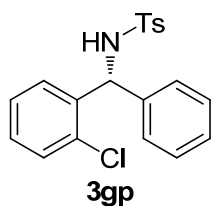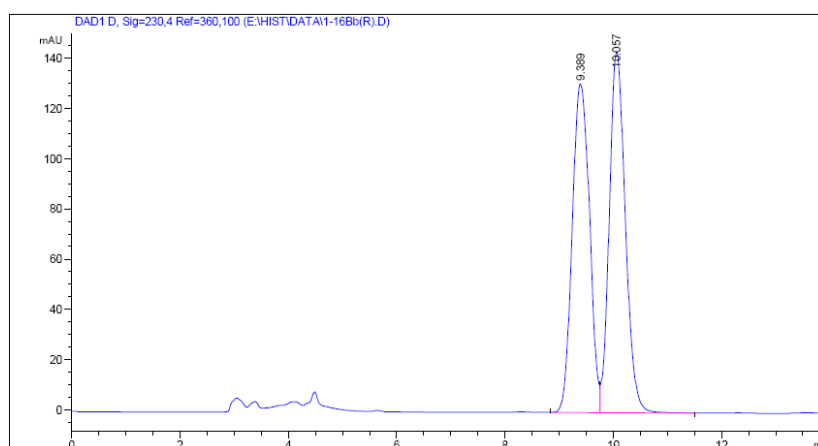

| Peak No.     | Peak ID | Ret Time (min) | Height (mAU) | Area (mAU*s) | Conc (%) |
|--------------|---------|----------------|--------------|--------------|----------|
| 1            |         | 9.389          | 130.91856    | 2887.63672   | 49.3914  |
| 2            |         | 10.057         | 143.72466    | 2958.80444   | 50.6085  |
| <b>Total</b> |         |                | 274.64322    | 5846.44116   | 100.000  |

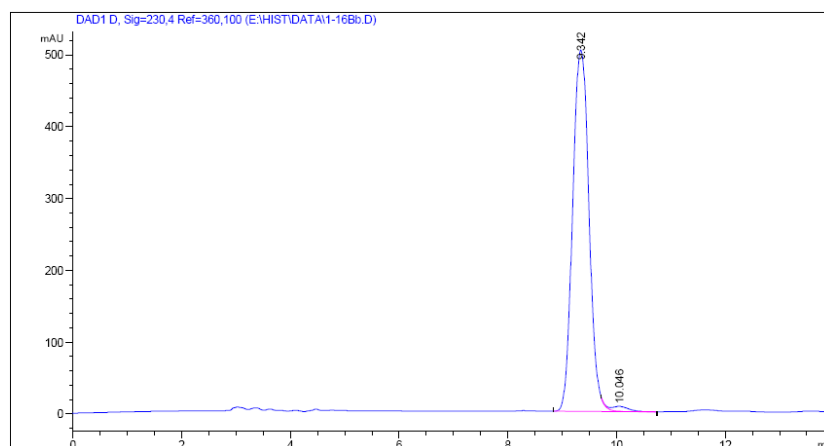

| Peak No.     | Peak ID | Ret Time (min) | Height (mAU) | Area (mAU*s) | Conc (%) |
|--------------|---------|----------------|--------------|--------------|----------|
| 1            |         | 9.342          | 502.91412    | 1.05288e4    | 98.6253  |
| 2            |         | 10.046         | 6.78513      | 146.75848    | 1.3747   |
| <b>Total</b> |         |                | 509.69926    | 1.06756e4    | 100.000  |

**(R)-N-((2-methoxyphenyl)(4-methoxyphenyl)methyl)-4-methylbenzenesulfonamide(3ca).**<sup>[9]</sup>

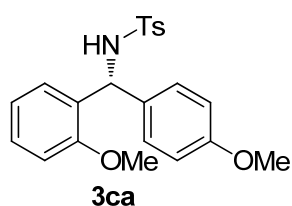

White solid, 111 mg, 93% yield, 95% ee, m.p. 130–132 °C.  $[\alpha]_D^{27} = +11.6$  ( $c = 0.52$ ,  $\text{CHCl}_3$ ). HPLC: Chiracel OD-H Column,  $n$ -hexane/ $i$ -propanol = 80/20,  $\lambda = 230$  nm, flow = 1.0 mL/min, 25 °C,  $t_R = 7.94$  min (major) and 12.50 min (minor).  $^1\text{H}$  NMR (400 MHz,  $\text{CDCl}_3$ )  $\delta$  7.50 (d,  $J = 8.3$  Hz, 2H), 7.18 – 7.11 (m, 1H), 7.11 – 7.02 (m, 4H), 6.98 – 6.96 (m, 1H), 6.83 – 6.72 (m, 3H), 6.67 (d,  $J = 8.2$  Hz, 1H), 5.73 (d,  $J = 9.0$  Hz, 1H), 5.60 (d,  $J = 9.0$  Hz, 1H), 3.75 (s, 3H), 3.60 (s, 3H), 2.32 (s, 3H).  $^{13}\text{C}$  NMR (100 MHz,  $\text{CDCl}_3$ )  $\delta$  158.8, 156.5, 142.9, 137.6, 132.8, 129.6, 129.1, 129.0, 128.2, 127.8, 127.1, 120.8, 113.6, 111.1, 58.7, 55.4, 21.6.

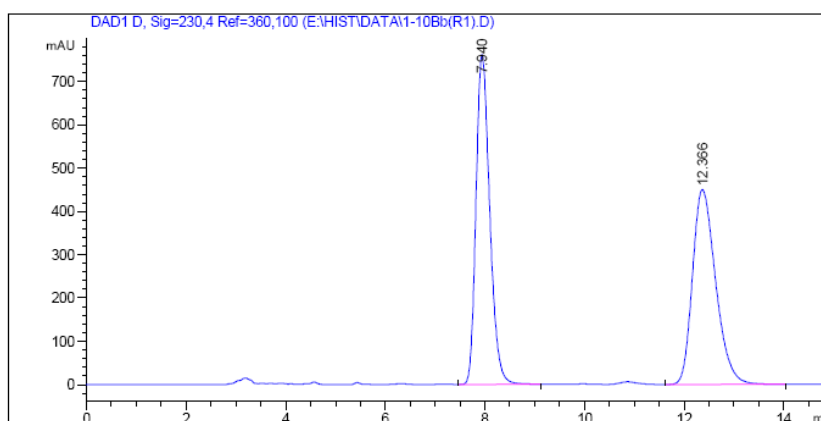

**Results**

| Peak No.     | Peak ID | Ret Time (min) | Height (mAU) | Area (mAU*s) | Conc (%) |
|--------------|---------|----------------|--------------|--------------|----------|
| 1            |         | 7.940          | 761.03497    | 1.45682e4    | 49.9961  |
| 2            |         | 12.366         | 449.81122    | 1.45705e4    | 50.0039  |
| <b>Total</b> |         |                | 1210.84619   | 2.91388e4    | 100.000  |

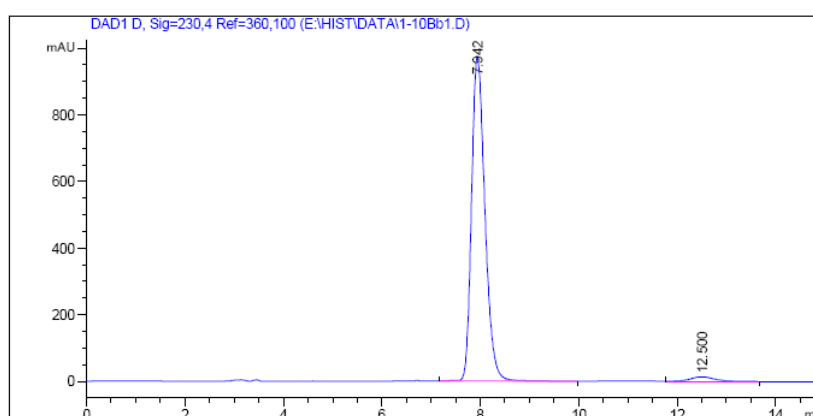

**Results**

| Peak No.     | Peak ID | Ret Time (min) | Height (mAU) | Area (mAU*s) | Conc (%) |
|--------------|---------|----------------|--------------|--------------|----------|
| 1            |         | 7.942          | 975.90387    | 1.84314e4    | 97.6746  |
| 2            |         | 12.500         | 13.17815     | 438.80249    | 2.3254   |
| <b>Total</b> |         |                | 989.08202    | 1.88702e4    | 100.000  |



**(S)-N-((3-methoxyphenyl)(4-methoxyphenyl)methyl)-4-methylbenzenesulfonamide(3dc).**

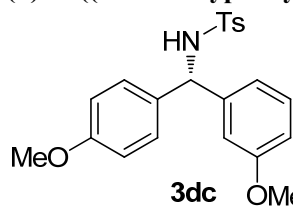

Colourless sticky oil, 113 mg, 95% yield, 98% ee.  $[\alpha]_D^{27} = +15.0$  ( $c = 0.55$ ,  $\text{CHCl}_3$ ). HPLC: Chiracel OD-H Column, n-hexane/i-propanol = 70/30, flow = 1.0 mL/min,  $\lambda = 230$  nm,  $t_R = 6.87$  min (minor) and 9.80 min (major).  $^1\text{H}$  NMR (400 MHz,  $\text{CDCl}_3$ )  $\delta$  7.56 (d,  $J = 8.3$  Hz, 2H), 7.22 – 7.07 (m, 3H), 7.01 (d,  $J = 8.7$  Hz, 2H), 6.80 – 6.70 (m, 3H), 6.69 – 6.61 (m, 2H), 5.48 (d,  $J = 6.9$  Hz, 1H), 5.07 (d,  $J = 6.9$  Hz, 1H), 3.75 (s, 3H), 3.68 (s, 3H), 2.38 (s, 3H).  $^{13}\text{C}$  NMR (100 MHz,  $\text{CDCl}_3$ )  $\delta$  159.7, 159.1, 143.3, 142.4, 137.5, 132.7, 129.7, 129.5, 128.7, 127.4, 119.7, 114.0, 113.1, 113.0, 60.9, 55.4, 55.2, 21.6. HRMS (ESI,  $m/z$ ) calcd for  $\text{C}_{22}\text{H}_{23}\text{NNaO}_4\text{S}$   $[\text{M} + \text{Na}]^+$  420.1245, found 420.1249.

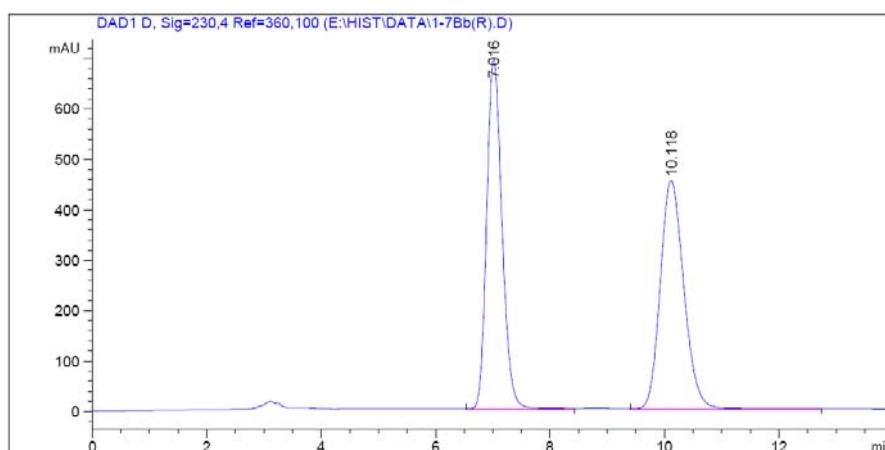

**Results**

| Peak No.     | Peak ID | Ret Time (min) | Height (mAU) | Area (mAU*s) | Conc (%) |
|--------------|---------|----------------|--------------|--------------|----------|
| 1            |         | 7.016          | 696.19525    | 1.28608e4    | 49.9296  |
| 2            |         | 10.118         | 453.22565    | 1.28970e4    | 50.0704  |
| <b>Total</b> |         |                | 1149.42090   | 2.57578e4    | 100.000  |

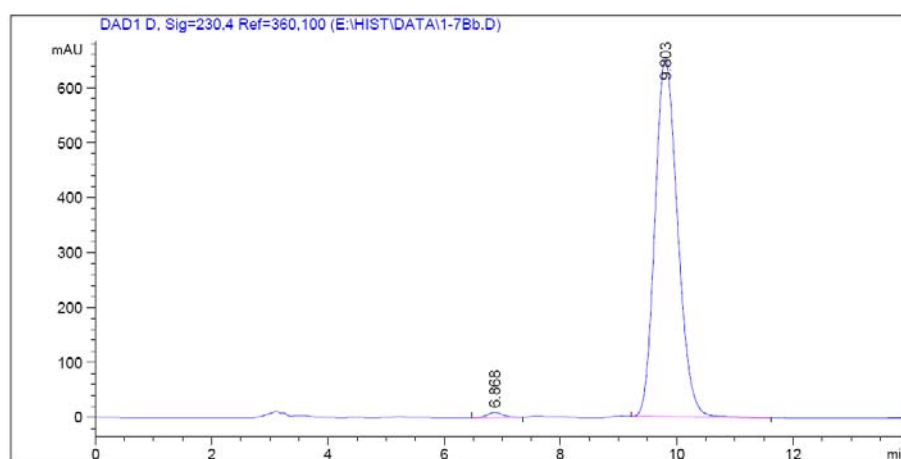

**Results**

| Peak No.     | Peak ID | Ret Time (min) | Height (mAU) | Area (mAU*s) | Conc (%) |
|--------------|---------|----------------|--------------|--------------|----------|
| 1            |         | 6.868          | 8.90098      | 161.07660    | 0.9055   |
| 2            |         | 9.803          | 650.18939    | 1.76268e4    | 99.0945  |
| <b>Total</b> |         |                | 659.09038    | 1.77879e4    | 100.000  |

**(R)-N-((4-methoxyphenyl)(p-tolyl)methyl)-4-methylbenzenesulfonamide(3df).**<sup>[9]</sup> White solid,

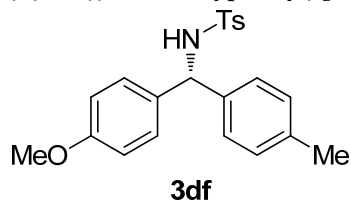

110 mg, 96% yield, 99% ee, m.p. 116–118 °C.  $[\alpha]_D^{27} = +6.8$  ( $c = 0.58$ ,  $\text{CHCl}_3$ ). HPLC: Chiracel OD-H Column,  $n$ -hexane/ $i$ -propanol = 80/20, flow = 1.0 mL/min,  $\lambda = 230$  nm, 25 °C,  $t_R = 9.65$  min (minor) and 10.66 min (major).  $^1\text{H}$  NMR (600 MHz,  $\text{CDCl}_3$ )  $\delta$  7.56 (d,  $J = 8.3$  Hz, 2H), 7.14 (d,  $J = 8.3$  Hz, 2H), 7.07 – 6.94 (m, 6H), 6.77 – 6.69 (m, 2H), 5.47 (d,  $J = 6.8$  Hz, 1H), 4.95 (d,  $J = 6.7$  Hz, 1H), 3.75 (s, 3H), 2.38 (s, 3H), 2.28 (s, 3H).  $^{13}\text{C}$  NMR (150MHz,  $\text{CDCl}_3$ )  $\delta$  159.1, 143.3, 137.4, 133.0, 129.5, 129.3, 128.7, 127.4, 127.3, 114.0, 60.8, 55.4, 21.6, 21.1

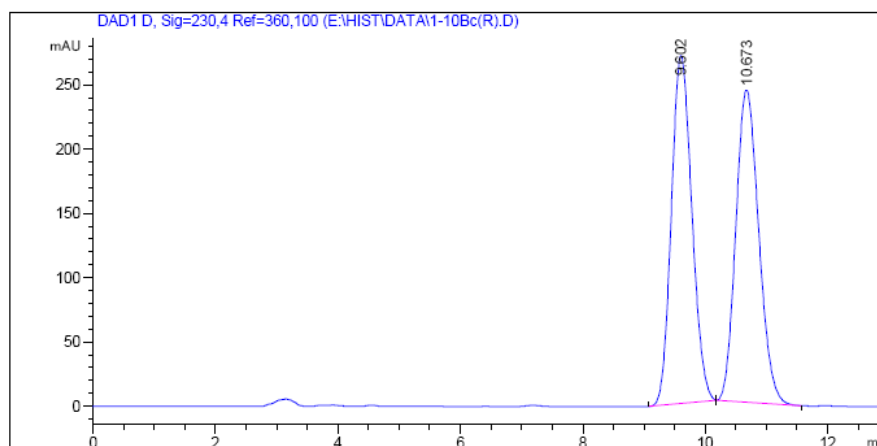

#### Results

| Peak No.     | Peak ID | Ret Time (min) | Height (mAU) | Area (mAU*s) | Conc (%) |
|--------------|---------|----------------|--------------|--------------|----------|
| 1            |         | 9.602          | 270.76440    | 6296.37598   | 49.9842  |
| 2            |         | 10.673         | 243.13013    | 6300.36377   | 50.0158  |
| <b>Total</b> |         |                | 513.89453    | 1.25967e4    | 100.000  |

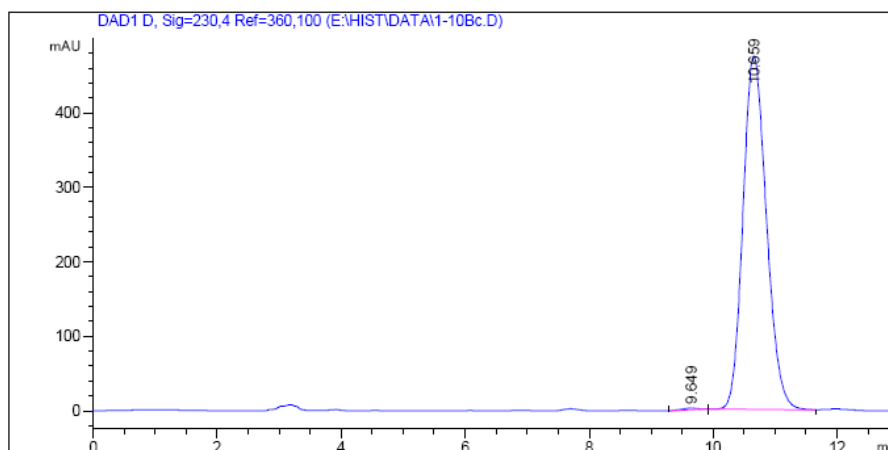

#### Results

| Peak No.     | Peak ID | Ret Time (min) | Height (mAU) | Area (mAU*s) | Conc (%) |
|--------------|---------|----------------|--------------|--------------|----------|
| 1            |         | 9.649          | 2.30597      | 43.35966     | 0.3468   |
| 2            |         | 10.659         | 474.43701    | 1.24586e4    | 99.6532  |
| <b>Total</b> |         |                | 476.74299    | 1.25019e4    | 100.000  |

**(S)-N-((4-methoxyphenyl)(*m*-tolyl)methyl)-4-methylbenzenesulfonamide(3de).** Colourless sticky oil, 109 mg, 95% yield. 96% ee.  $[\alpha]_D^{27} = +14.8$  ( $c = 0.44$ ,  $\text{CHCl}_3$ ). HPLC: Chiracel OD-H Column, *n*-hexane/*i*-propanol = 70/30, flow = 1.0 mL/min,  $\lambda = 230$  nm, 25 °C,  $t_R = 5.58$  min (minor) and 8.50 min (major).  $^1\text{H}$  NMR (400 MHz,  $\text{CDCl}_3$ )  $\delta$  7.54 (d,  $J = 8.3$  Hz, 2H), 7.19 – 7.06 (m, 3H), 7.06 – 6.95 (m, 3H), 6.93 – 6.82 (m, 2H), 6.77 – 6.69 (m, 2H), 5.47 (d,  $J = 7.1$  Hz, 1H), 5.12 (d,  $J = 7.0$  Hz, 1H), 3.75 (s, 3H), 2.38 (s, 3H), 2.20 (s, 3H).  $^{13}\text{C}$  NMR (100 MHz,  $\text{CDCl}_3$ )  $\delta$  159.0, 143.2, 140.7, 138.2, 137.5, 132.9, 129.4, 128.7, 128.5, 128.3, 128.1, 127.3, 124.5, 113.9, 60.9, 55.4, 21.6, 21.4. HRMS (ESI,  $m/z$ ) calcd for  $\text{C}_{22}\text{H}_{23}\text{NNaO}_3\text{S}$   $[\text{M} + \text{Na}]^+$  404.1296, found 404.1292.

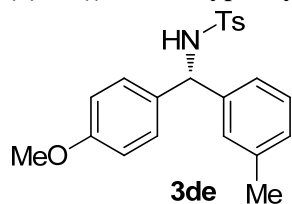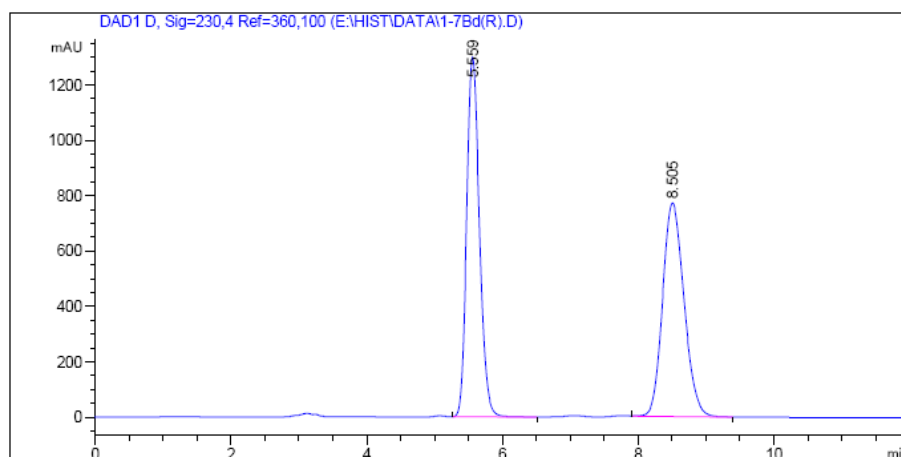

#### Results

| Peak No.     | Peak ID | Ret Time (min) | Height (mAU) | Area (mAU*s) | Conc (%) |
|--------------|---------|----------------|--------------|--------------|----------|
| 1            |         | 5.559          | 1299.42834   | 1.69193e4    | 50.0577  |
| 2            |         | 8.505          | 770.95630    | 1.68803e4    | 49.9423  |
| <b>Total</b> |         |                | 2070.38464   | 3.37995e4    | 100.000  |

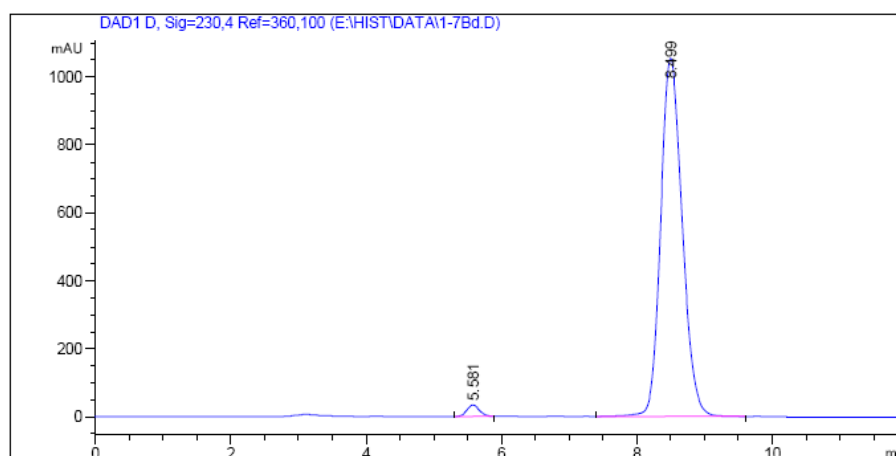

#### Results

| Peak No.     | Peak ID | Ret Time (min) | Height (mAU) | Area (mAU*s) | Conc (%) |
|--------------|---------|----------------|--------------|--------------|----------|
| 1            |         | 5.581          | 33.60473     | 431.24588    | 1.8157   |
| 2            |         | 8.499          | 1054.44812   | 2.33197e4    | 98.1843  |
| <b>Total</b> |         |                | 1088.05285   | 2.37509e4    | 100.000  |

**(S)-N-((4-methoxyphenyl)(*o*-tolyl)methyl)-4-methylbenzenesulfonamide(3dd).**<sup>[6]</sup> Colourless sticky oil. 106 mg, 93% yield. 98% ee.  $[\alpha]_D^{27} = +23.0$  ( $c = 0.62$ ,  $\text{CHCl}_3$ ). HPLC: Chiracel OD-H Column, *n*-hexane/*i*-propanol = 70/30, flow = 1.0 mL/min,  $\lambda = 230$  nm, 25 °C,  $t_R = 5.07$  min (minor) and 8.06 min (major).  $^1\text{H}$  NMR (400 MHz,  $\text{CDCl}_3$ )  $\delta$  7.55 (d,  $J = 8.3$  Hz, 2H), 7.15 – 7.04 (m, 6H), 7.00 – 6.91 (m, 2H), 6.79 – 6.69 (m, 2H), 5.73 (d,  $J = 6.9$  Hz, 1H), 4.87 (d,  $J = 6.6$  Hz, 1H), 3.75 (s, 3H), 2.38 (s, 1H), 2.13 (s, 1H).  $^{13}\text{C}$  NMR (100 MHz,  $\text{CDCl}_3$ )  $\delta$  159.1, 143.3, 138.5, 137.6, 135.5, 132.1, 130.8, 129.5, 129.0, 127.6, 127.3, 127.1, 114.0, 57.8, 55.4, 21.6, 19.5.

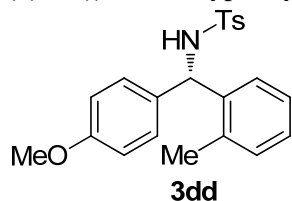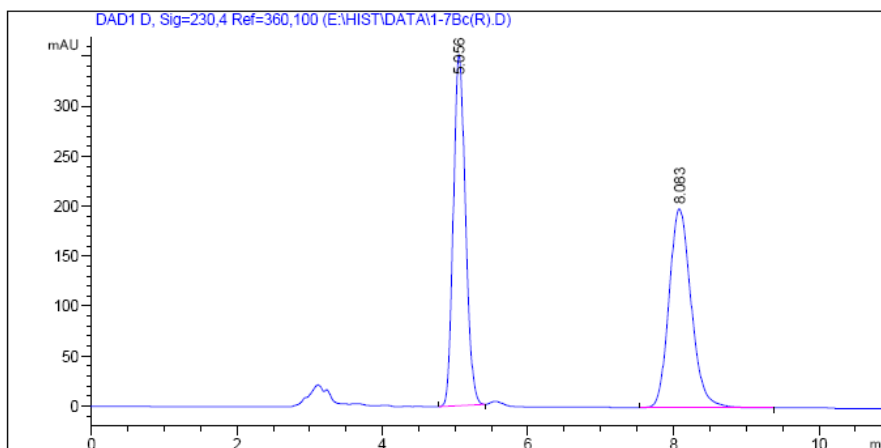

| Peak No.     | Peak ID | Ret Time (min) | Height (mAU) | Area (mAU*s) | Conc (%) |
|--------------|---------|----------------|--------------|--------------|----------|
| 1            |         | 5.056          | 351.29510    | 4078.09326   | 49.2607  |
| 2            |         | 8.083          | 198.84413    | 4200.49365   | 50.7393  |
| <b>Total</b> |         |                | 550.13924    | 8278.58691   | 100.000  |

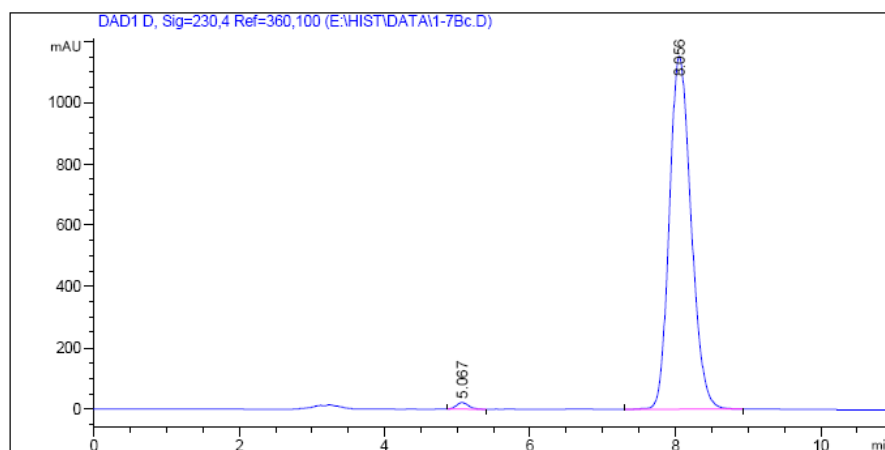

| Peak No.     | Peak ID | Ret Time (min) | Height (mAU) | Area (mAU*s) | Conc (%) |
|--------------|---------|----------------|--------------|--------------|----------|
| 1            |         | 5.067          | 21.25774     | 242.20439    | 1.0032   |
| 2            |         | 8.056          | 1151.81201   | 2.39009e4    | 98.9968  |
| <b>Total</b> |         |                | 1173.06975   | 2.41431e4    | 100.000  |

**(R)-N-((4-methoxyphenyl)(4-(trifluoromethyl)phenyl)methyl)-4-methylbenzenesulfonamide**

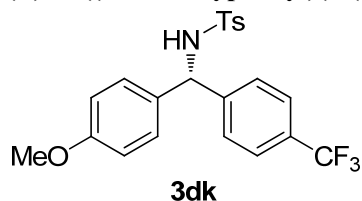

**3dk**

**(3dk).** White solid, 128 mg, 98% yield, 99% ee, m.p. 115–117 °C.  $[\alpha]_D^{27} = +24.4$  ( $c = 0.66$ ,  $\text{CHCl}_3$ ). HPLC: Chiralcel OD-H Column, *n*-hexane/*i*-propanol = 80/20, flow = 1.0 mL/min,  $\lambda = 230$  nm, 25 °C,  $t_R = 11.12$  min (minor) and 12.68 min (major).  $^1\text{H}$  NMR (400 MHz,  $\text{CDCl}_3$ )  $\delta$  7.59 – 7.49 (m, 2H), 7.44 (d,  $J = 8.2$  Hz, 2H), 7.32 – 7.22 (m, 2H), 7.13 (d,  $J = 8.0$  Hz, 2H), 7.00 – 6.91 (m, 2H), 6.81 – 6.71 (m, 2H), 5.56 (d,  $J = 6.8$  Hz, 1H), 5.15 (d,  $J = 6.7$  Hz, 1H), 3.75 (s, 3H), 2.38 (s, 3H).  $^{13}\text{C}$  NMR (100 MHz,  $\text{CDCl}_3$ )  $\delta$  159.5, 144.6, 143.7, 137.2, 132.0, 129.6, 128.7, 127.8, 127.3, 125.5 (q,  $J = 3.8$  Hz), 114.3, 60.7, 55.4, 21.6. HRMS (ESI,  $m/z$ ) calcd for  $\text{C}_{22}\text{H}_{20}\text{F}_3\text{NNaO}_3\text{S}$   $[\text{M} + \text{Na}]^+$  458.1014, found 458.1019.

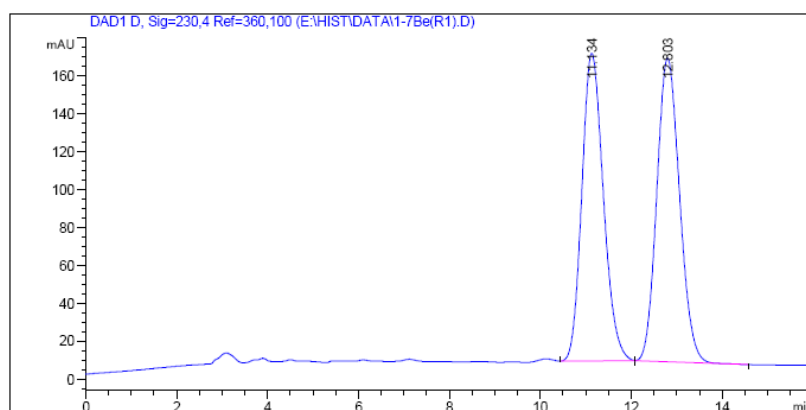

**Results**

| Peak No.     | Peak ID | Ret Time (min) | Height (mAU) | Area (mAU·s) | Conc (%) |
|--------------|---------|----------------|--------------|--------------|----------|
| 1            |         | 11.134         | 162.29820    | 5333.61963   | 48.9173  |
| 2            |         | 12.803         | 160.17889    | 5569.71924   | 51.0827  |
| <b>Total</b> |         |                | 322.47710    | 1.09033e4    | 100.000  |

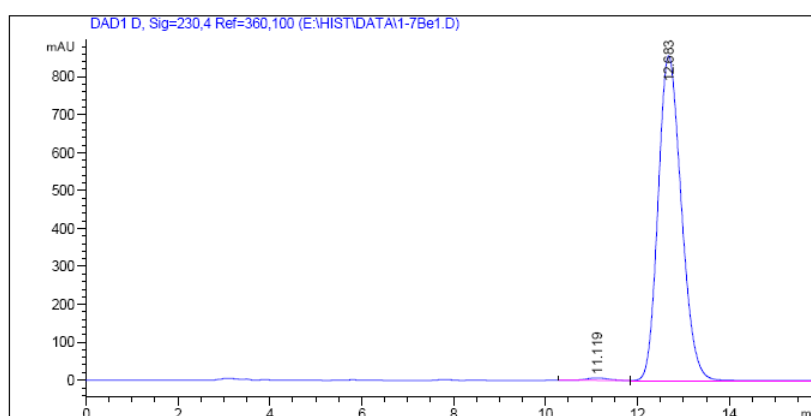

**Results**

| Peak No.     | Peak ID | Ret Time (min) | Height (mAU) | Area (mAU·s) | Conc (%) |
|--------------|---------|----------------|--------------|--------------|----------|
| 1            |         | 11.119         | 6.87175      | 225.73616    | 0.7459   |
| 2            |         | 12.683         | 856.82690    | 3.00384e4    | 99.2541  |
| <b>Total</b> |         |                | 863.69865    | 3.02641e4    | 100.000  |

**(S)-N-((4-chlorophenyl)(4-methoxyphenyl)methyl)-4-methylbenzenesulfonamide(3dh).**<sup>[6]</sup>

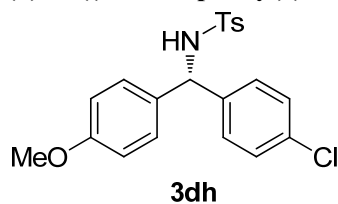

White solid, 119 mg, 99% yield, 98% ee, m.p. 96–97 °C.  $[\alpha]_D^{27} = +14.1$  ( $c = 0.65$ ,  $\text{CHCl}_3$ ). HPLC: Chiralcel OD-H Column,  $n$ -hexane/ $i$ -propanol = 70/30, flow = 1.0 mL/min,  $\lambda = 230$  nm, 25 °C,  $t_R = 7.45$  min (minor) and 9.15 min (major).  $^1\text{H NMR}$  (400 MHz,  $\text{CDCl}_3$ )  $\delta$  7.54 (d,  $J = 8.3$  Hz, 2H), 7.17 – 7.13 (m, 4H), 7.06 (d,  $J = 8.5$  Hz, 2H), 7.00 – 6.91 (m, 2H), 6.80 – 6.65 (m, 2H), 5.48 (d,  $J = 7.0$  Hz, 1H), 5.28 (d,  $J = 7.1$  Hz, 1H), 3.74 (s, 3H), 2.39 (s, 3H).  $^{13}\text{C NMR}$  (100 MHz,  $\text{CDCl}_3$ )  $\delta$  159.3, 143.5, 139.3, 137.3, 133.4, 132.4, 129.5, 128.8, 128.7, 127.3, 114.1, 60.4, 55.4, 21.6.

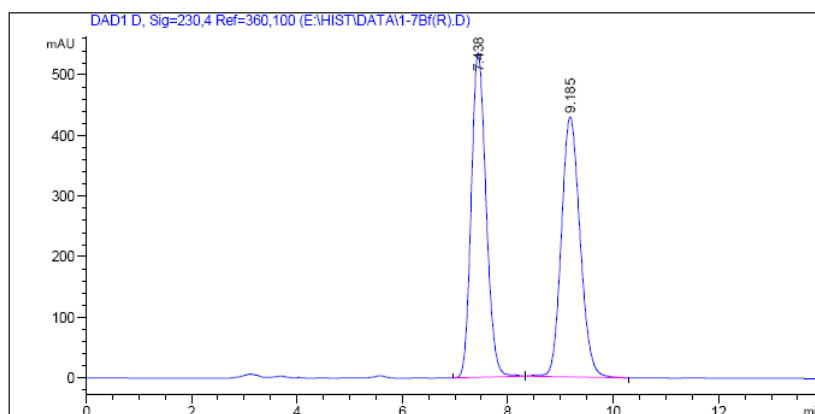

**Results**

| Peak No.     | Peak ID | Ret Time (min) | Height (mAU) | Area (mAU*s) | Conc (%) |
|--------------|---------|----------------|--------------|--------------|----------|
| 1            |         | 7.438          | 535.14221    | 1.04416e4    | 49.7213  |
| 2            |         | 9.185          | 429.19498    | 1.05586e4    | 50.2787  |
| <b>Total</b> |         |                | 964.33719    | 2.10002e4    | 100.000  |

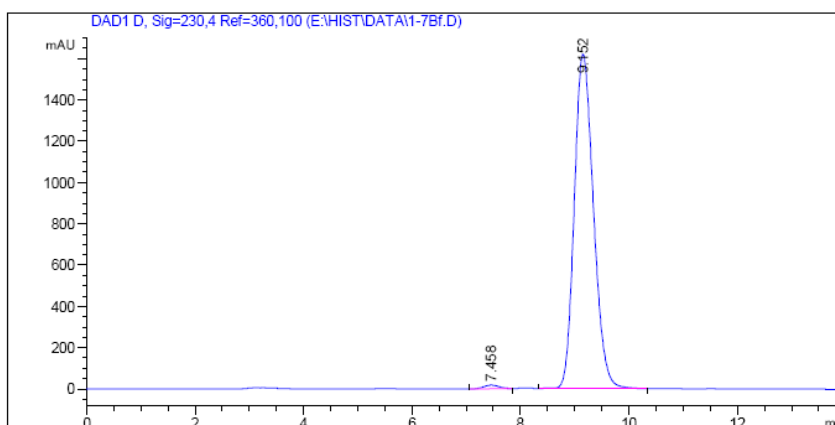

**Results**

| Peak No.     | Peak ID | Ret Time (min) | Height (mAU) | Area (mAU*s) | Conc (%) |
|--------------|---------|----------------|--------------|--------------|----------|
| 1            |         | 7.458          | 17.30678     | 343.43430    | 0.8569   |
| 2            |         | 9.152          | 1618.85278   | 3.97333e4    | 99.1431  |
| <b>Total</b> |         |                | 1636.15956   | 4.00767e4    | 100.000  |

(S)-N-((4-methoxyphenyl)(naphthalen-1-yl)methyl)-4-methylbenzenesulfonamide(3dm).<sup>[8]</sup>

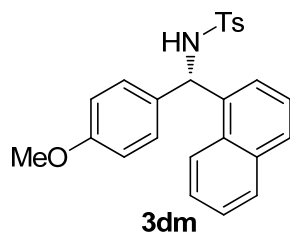

White solid, 113 mg, 90% yield, 97% ee, m.p. 176–178 °C.  $[\alpha]_D^{28} = +5.6$  ( $c = 0.70$ ,  $\text{CHCl}_3$ ). HPLC: Chiralcel OD-H Column,  $n$ -hexane/ $i$ -propanol = 80/20, flow = 1.0 mL/min,  $\lambda = 230$  nm, 25 °C,  $t_R = 18.33$  min (minor) and 22.18 min (major).  $^1\text{H}$  NMR (400 MHz,  $\text{CDCl}_3$ )  $\delta$  7.82 – 7.71 (m, 3H), 7.51 (d,  $J = 8.3$  Hz, 2H), 7.45 – 7.35 (m, 2H), 7.34 – 7.24 (m, 2H), 7.07 – 6.98 (m, 4H), 6.73 – 6.69 (m, 2H), 6.25 (d,  $J = 6.9$  Hz, 1H), 5.12 (d,  $J = 6.9$  Hz, 1H), 3.74 (s, 3H), 2.35 (s, 3H).  $^{13}\text{C}$  NMR (100 MHz,  $\text{CDCl}_3$ )  $\delta$  159.1, 143.3, 137.4, 135.7, 134.1, 132.4, 130.5, 129.4, 128.9, 128.6, 127.3, 126.6, 126.0, 125.8, 125.2, 123.5, 114.1, 58.2, 55.4, 21.6.

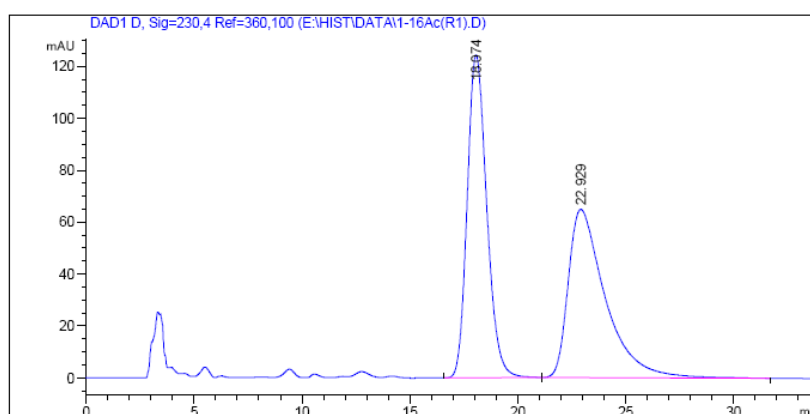

Results

| Peak No.     | Peak ID | Ret Time (min) | Height (mAU) | Area (mAU·s) | Conc (%) |
|--------------|---------|----------------|--------------|--------------|----------|
| 1            |         | 18.074         | 124.33814    | 7826.43701   | 50.3156  |
| 2            |         | 22.929         | 64.74956     | 7728.24805   | 49.6844  |
| <b>Total</b> |         |                | 189.08770    | 1.55547e4    | 100.000  |

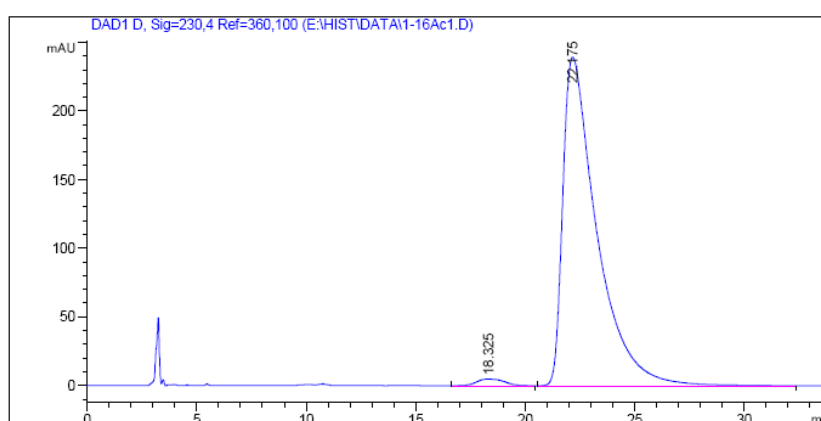

Results

| Peak No.     | Peak ID | Ret Time (min) | Height (mAU) | Area (mAU·s) | Conc (%) |
|--------------|---------|----------------|--------------|--------------|----------|
| 1            |         | 18.325         | 4.87382      | 424.79007    | 1.6182   |
| 2            |         | 22.175         | 239.27130    | 2.58260e4    | 98.3818  |
| <b>Total</b> |         |                | 244.14512    | 2.62508e4    | 100.000  |

(S)-N-((4-methoxyphenyl)(naphthalen-2-yl)methyl)-4-methylbenzenesulfonamide(3dn).<sup>[8]</sup>

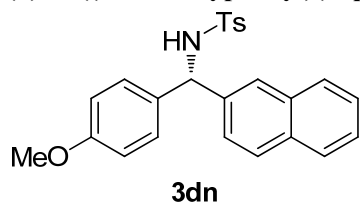

White solid, 116 mg, 93% yield, 98% ee, m.p. 147–149 °C.  $[\alpha]_D^{28} = +8.1$  ( $c = 0.55$ ,  $\text{CHCl}_3$ ). HPLC: Chiralcel OD-H Column, *n*-hexane/*i*-propanol = 80/20, flow = 1.0 mL/min,  $\lambda = 230$  nm, 25 °C,  $t_R = 11.93$  min (minor) and 18.76 min (major).  $^1\text{H}$  NMR (400 MHz,  $\text{CDCl}_3$ )  $\delta$  7.81 – 7.74 (m, 1H), 7.67 – 7.62 (m, 2H), 7.55 – 7.50 (m, 3H), 7.46 – 7.42 (m, 2H), 7.18 – 7.15 (m, 1H), 7.05 – 7.02 (m, 4H), 6.75 – 6.72 (m, 2H), 5.68 (d,  $J = 7.3$  Hz, 1H), 5.25 (d,  $J = 7.2$  Hz, 1H), 3.75 (s, 1H), 2.26 (s, 3H).  $^{13}\text{C}$  NMR (100 MHz,  $\text{CDCl}_3$ )  $\delta$  159.2, 143.3, 137.8, 137.4, 133.1, 132.7 (d,  $J = 2.9$  Hz), 129.4, 128.9, 128.6, 128.1, 127.7, 127.3, 126.4 (d,  $J = 1.9$  Hz), 126.3, 125.3, 114.1, 61.1, 55.4, 21.5.

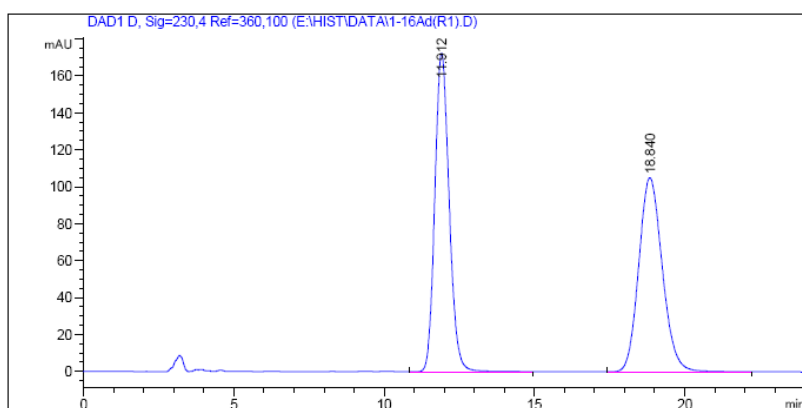

**Results**

| Peak No.     | Peak ID | Ret Time (min) | Height (mAU) | Area (mAU*s) | Conc (%) |
|--------------|---------|----------------|--------------|--------------|----------|
| 1            |         | 11.912         | 172.32610    | 5717.25244   | 50.0143  |
| 2            |         | 18.840         | 104.97494    | 5713.98047   | 49.9857  |
| <b>Total</b> |         |                | 277.30103    | 1.14312e4    | 100.000  |

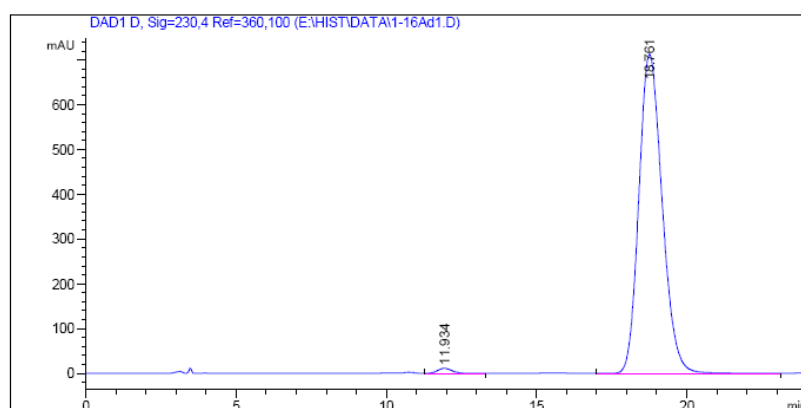

**Results**

| Peak No.     | Peak ID | Ret Time (min) | Height (mAU) | Area (mAU*s) | Conc (%) |
|--------------|---------|----------------|--------------|--------------|----------|
| 1            |         | 11.934         | 11.22298     | 369.45346    | 0.9541   |
| 2            |         | 18.761         | 712.84143    | 3.83527e4    | 99.0459  |
| <b>Total</b> |         |                | 724.06441    | 3.87221e4    | 100.000  |



**(S)-N-((2-methoxyphenyl)(p-tolyl)methyl)-4-methylbenzenesulfonamide(3eb).** White solid, 108 mg, 94% yield. 95% ee. m.p. 104–106 °C.  $[\alpha]_D^{27} = -7.4$  (c = 0.54, CHCl<sub>3</sub>). HPLC: Chiralcel OD-H Column, *n*-hexane/*i*-propanol = 80/20, flow = 1.0 mL/min,  $\lambda = 230$  nm, 25 °C,  $t_R = 5.72$  min (minor) and 7.83 min (major). <sup>1</sup>H NMR (400 MHz, CDCl<sub>3</sub>)  $\delta$  7.51 (d, *J* = 8.3 Hz, 2H), 7.18 – 7.12 (m, 1H), 7.07 – 6.96 (m, 7H), 6.79 – 6.75 (m, 1H), 6.65 (d, *J* = 8.1 Hz, 1H), 5.79 (d, *J* = 9.1 Hz, 1H), 5.62 (d, *J* = 9.0 Hz, 1H), 3.59 (s, 3H), 2.32 (s, 3H), 2.28 (s, 3H). <sup>13</sup>C NMR (100 MHz, CDCl<sub>3</sub>)  $\delta$  156.5, 142.8, 137.7, 137.6, 136.9, 129.7, 129.1, 129.0, 127.8, 127.1, 126.9, 120.7, 111.1, 58.9, 55.3, 21.5, 21.1. HRMS (ESI, *m/z*) calcd for C<sub>22</sub>H<sub>23</sub>NNaO<sub>3</sub>S [M + Na]<sup>+</sup> 404.1296, found 404.1292.

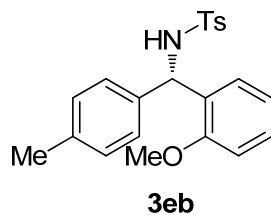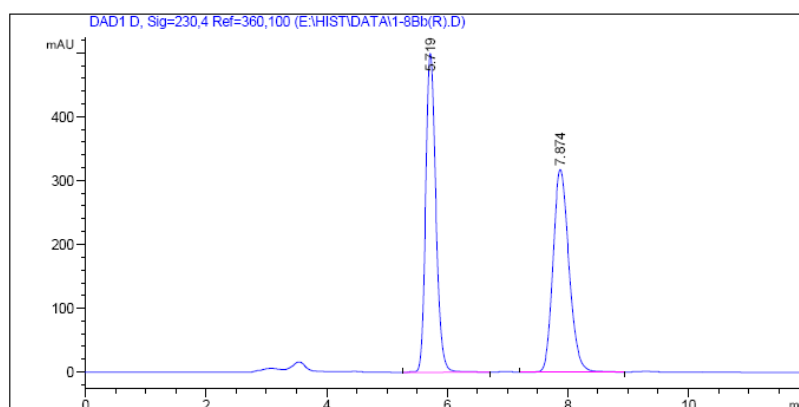

### Results

| Peak No.     | Peak ID | Ret Time (min) | Height (mAU) | Area (mAU*s) | Conc (%) |
|--------------|---------|----------------|--------------|--------------|----------|
| 1            |         | 5.719          | 499.90292    | 5838.12061   | 50.1491  |
| 2            |         | 7.847          | 317.20984    | 5803.41211   | 49.8509  |
| <b>Total</b> |         |                | 817.11276    | 1.16415e4    | 100.000  |

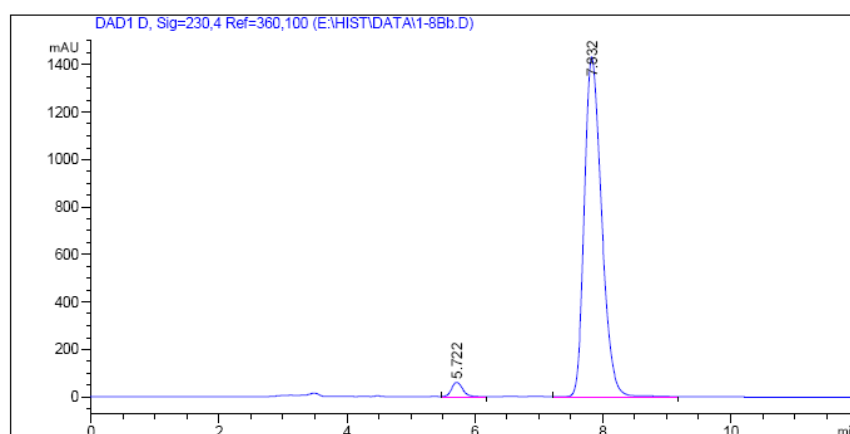

### Results

| Peak No.     | Peak ID | Ret Time (min) | Height (mAU) | Area (mAU*s) | Conc (%) |
|--------------|---------|----------------|--------------|--------------|----------|
| 1            |         | 5.722          | 59.74057     | 710.10852    | 2.5850   |
| 2            |         | 7.832          | 1431.83801   | 2.67599e4    | 97.4150  |
| <b>Total</b> |         |                | 1491.57858   | 2.74700e4    | 100.000  |

(*S*)-*N*-((4-methoxyphenyl)(*p*-tolyl)methyl)-4-methylbenzenesulfonamide(**3ea**).<sup>[8]</sup> White solid.

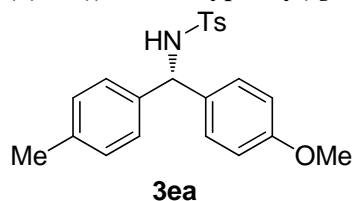

111 mg, 97% yield, 95% ee, m.p. 116–118 °C.  $[\alpha]_D^{24} = -4.8$  ( $c = 0.65$ ,  $\text{CHCl}_3$ ). Characterization data is the same with **3df** (with a reverse configuration of **3df**). HPLC: Chiralcel OD-H Column, *n*-hexane/*i*-propanol = 80/20, flow = 1.0 mL/min,  $\lambda = 230$  nm, 25 °C,  $t_R = 9.23$  min (major) and 10.33 min (minor).

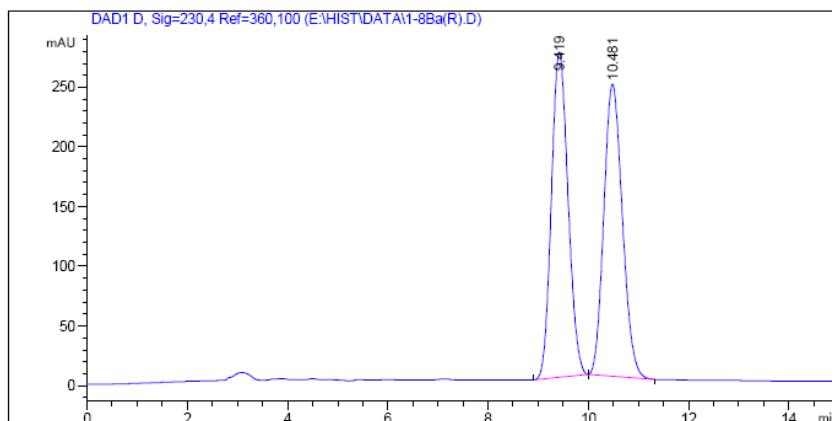

### Results

| Peak No.     | Peak ID | Ret Time (min) | Height (mAU) | Area (mAU·s) | Conc (%) |
|--------------|---------|----------------|--------------|--------------|----------|
| 1            |         | 9.419          | 272.54245    | 6281.99805   | 49.9930  |
| 2            |         | 10.481         | 244.66333    | 6283.74512   | 50.0070  |
| <b>Total</b> |         |                | 517.20578    | 1.25657e4    | 100.000  |

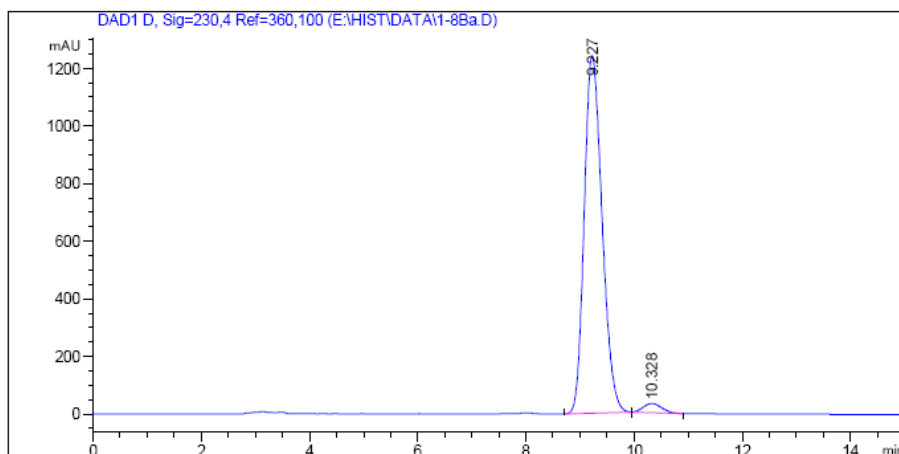

### Results

| Peak No.     | Peak ID | Ret Time (min) | Height (mAU) | Area (mAU·s) | Conc (%) |
|--------------|---------|----------------|--------------|--------------|----------|
| 1            |         | 9.227          | 1241.97168   | 2.84497e4    | 97.4174  |
| 2            |         | 10.328         | 31.72493     | 754.22119    | 2.5826   |
| <b>Total</b> |         |                | 1273.69661   | 2.92039e4    | 100.000  |

**(S)-N-((4-chlorophenyl)(p-tolyl)methyl)-4-methylbenzenesulfonamide(3eh).**<sup>[7]</sup> White solid, 110 mg, 96% yield, 98% ee, m.p. 121–122 °C.  $[\alpha]_D^{27} = +7.2$  (c = 0.64, CHCl<sub>3</sub>). HPLC: Chiracel OD-H Column, *n*-hexane/*i*-propanol = 80/20, flow = 1.0 mL/min,  $\lambda = 230$  nm, 25 °C,  $t_R = 7.32$  min (minor) and 8.14 min (major). <sup>1</sup>H NMR (600 MHz, CDCl<sub>3</sub>)  $\delta$  7.55 (d, *J* = 8.3 Hz, 2H), 7.20 – 7.12 (m, 4H), 7.09 – 6.99 (m, 4H), 6.91 (d, *J* = 8.1 Hz, 2H), 5.48 (d, *J* = 7.0 Hz, 1H), 5.12 (d, *J* = 6.0 Hz, 1H), 2.39 (s, 3H), 2.28 (s, 3H). <sup>13</sup>C NMR (150 MHz, CDCl<sub>3</sub>)  $\delta$  143.5, 139.3, 137.9, 137.4, 137.3, 133.5, 129.5, 128.9, 128.7, 127.3 (d, *J* = 3.1 Hz), 60.7, 21.6, 21.2.

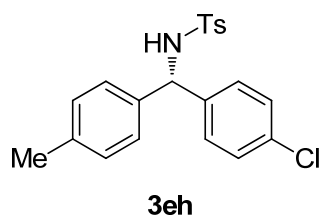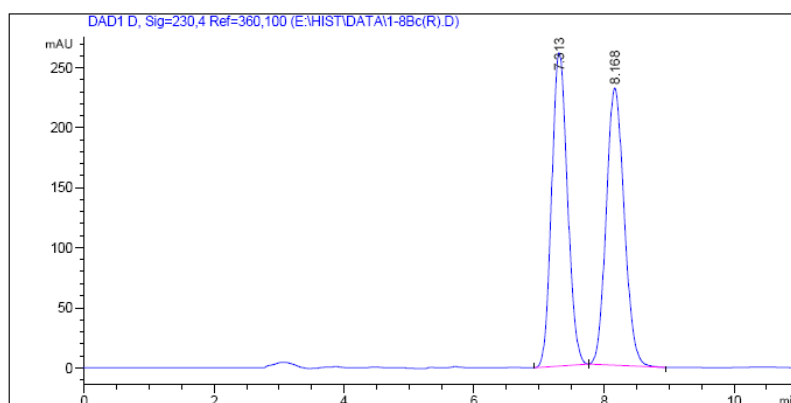

#### Results

| Peak No.     | Peak ID | Ret Time (min) | Height (mAU) | Area (mAU*s) | Conc (%) |
|--------------|---------|----------------|--------------|--------------|----------|
| 1            |         | 7.313          | 261.43140    | 4409.42285   | 49.7658  |
| 2            |         | 8.168          | 231.27983    | 4450.92480   | 50.2342  |
| <b>Total</b> |         |                | 492.71123    | 8860.34766   | 100.000  |

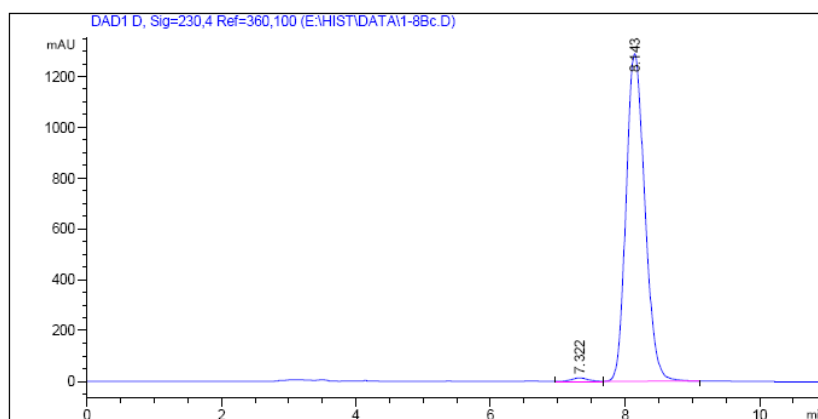

#### Results

| Peak No.     | Peak ID | Ret Time (min) | Height (mAU) | Area (mAU*s) | Conc (%) |
|--------------|---------|----------------|--------------|--------------|----------|
| 1            |         | 7.322          | 13.16964     | 216.13364    | 0.8572   |
| 2            |         | 8.143          | 1288.65222   | 2.49974e4    | 99.1428  |
| <b>Total</b> |         |                | 1301.82186   | 2.52135e4    | 100.000  |

**(S)-4-methyl-N-(naphthalen-1-yl(*p*-tolyl)methyl)benzenesulfonamide (3em).** White solid, 109 mg, 90% yield, 97% ee, m.p. 157–159 °C.  $[\alpha]_D^{28} = +1.8$  (c = 0.60, CHCl<sub>3</sub>). HPLC: Chiralcel OD-H Column, *n*-hexane/*i*-propanol = 80/20, flow = 1.0 mL/min,  $\lambda = 230$  nm, 25 °C,  $t_R = 9.92$  min (minor) and 12.45 min (major). <sup>1</sup>H NMR (400 MHz, CDCl<sub>3</sub>)  $\delta$  7.81–7.77 (m, 2H), 7.73–7.70 (m, 1H), 7.50 (d, *J* = 8.2 Hz, 2H), 7.45–7.35 (m, 2H), 7.30–7.26 (m, 2H), 7.05 (d, *J* = 8.0 Hz, 2H), 7.02–6.97 (m, 4H), 6.26 (d, *J* = 7.0 Hz, 1H), 5.17 (d, *J* = 6.9 Hz, 1H), 2.35 (s, 3H), 2.27 (s, 3H). <sup>13</sup>C NMR (100 MHz, CDCl<sub>3</sub>)  $\delta$  143.2, 137.5, 137.4, 135.7, 134.1, 130.6, 129.41, 129.37, 129.0, 128.6, 127.6, 127.3, 126.6, 126.1, 125.8, 125.2, 123.5, 58.5, 21.6, 21.2. HRMS (ESI, *m/z*) calcd for C<sub>25</sub>H<sub>23</sub>NNaO<sub>2</sub>S [M + Na]<sup>+</sup> 424.1347, found 424.1343.

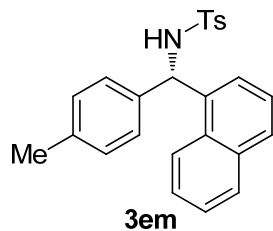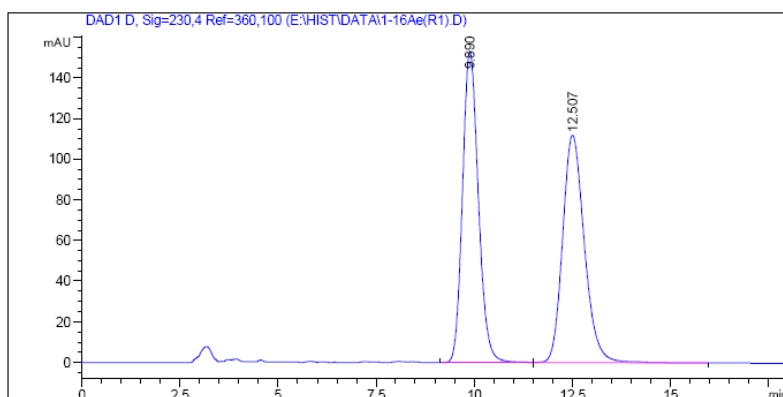

### Results

| Peak No.     | Peak ID | Ret Time (min) | Height (mAU) | Area (mAU.s) | Conc (%) |
|--------------|---------|----------------|--------------|--------------|----------|
| 1            |         | 9.890          | 153.19661    | 4298.52246   | 49.9783  |
| 2            |         | 12.507         | 111.84264    | 4302.25586   | 50.0217  |
| <b>Total</b> |         |                | 265.03925    | 8600.77832   | 100.000  |

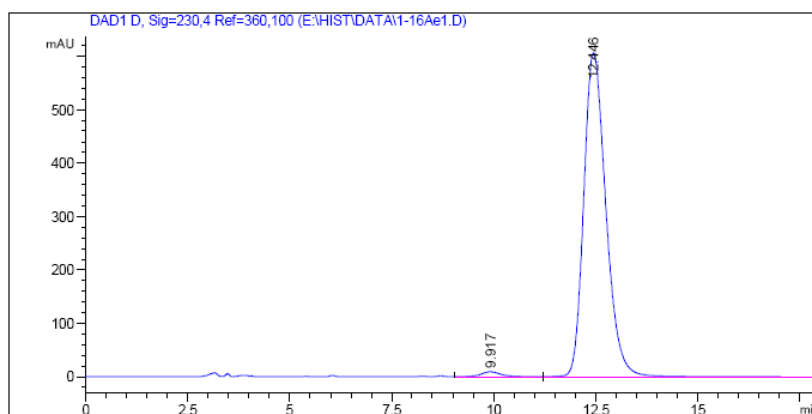

### Results

| Peak No.     | Peak ID | Ret Time (min) | Height (mAU) | Area (mAU.s) | Conc (%) |
|--------------|---------|----------------|--------------|--------------|----------|
| 1            |         | 9.917          | 9.23605      | 309.30435    | 1.3371   |
| 2            |         | 12.446         | 606.55634    | 2.28237e4    | 98.6629  |
| <b>Total</b> |         |                | 615.79238    | 2.31330e4    | 100.000  |

(*S*)-4-methyl-*N*-(naphthalen-2-yl(*p*-tolyl)methyl)benzenesulfonamide(**3en**).<sup>[7]</sup> White solid,

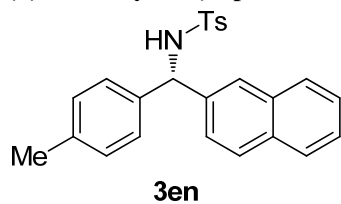

112 mg, 93% yield, 97% ee, m.p. 140–142 °C.  $[\alpha]_D^{28} = -5.2$  (c = 1.02, CHCl<sub>3</sub>). HPLC: Chiracel OD-H Column, *n*-hexane/*i*-propanol = 80/20, flow = 1.0 mL/min,  $\lambda = 230$  nm, 25 °C,  $t_R = 8.43$  min (minor) and 11.73 min (major). <sup>1</sup>H NMR (400 MHz, CDCl<sub>3</sub>)  $\delta$  7.75 – 7.72 (m, 1H), 7.65 – 7.60 (m, 2H), 7.54 – 7.51 (m, 3H), 7.45 – 7.40 (m, 2H), 7.18 – 7.15 (m, 1H), 7.04 – 7.00 (m, 6H), 5.68 (d,  $J = 7.3$  Hz, 1H), 5.38 (d,  $J = 7.2$  Hz, 1H), 2.27 (s, 3H), 2.25 (s, 3H). <sup>13</sup>C NMR (100 MHz, CDCl<sub>3</sub>)  $\delta$  143.3, 137.8, 137.7, 137.6, 137.5, 133.1, 132.8, 129.42, 129.39, 128.5, 128.1, 127.7, 127.5, 127.3, 126.4, 126.3, 126.2, 125.3, 61.4, 21.5, 21.2.

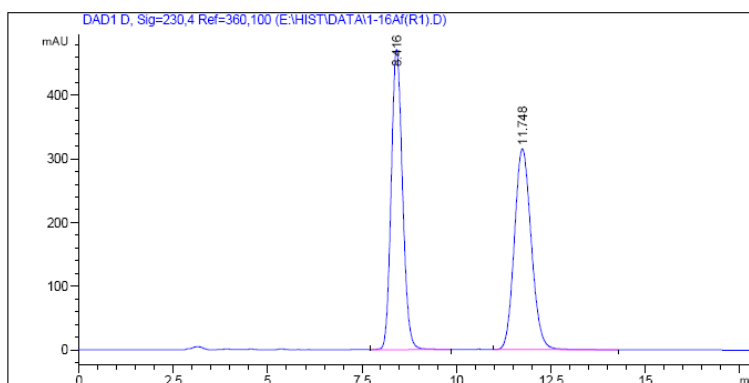

### Results

| Peak No.     | Peak ID | Ret Time (min) | Height (mAU) | Area (mAU*s) | Conc (%) |
|--------------|---------|----------------|--------------|--------------|----------|
| 1            |         | 8.416          | 471.77914    | 9810.02832   | 49.9939  |
| 2            |         | 11.748         | 315.77045    | 9812.40332   | 50.0061  |
| <b>Total</b> |         |                | 787.54959    | 1.96224e4    | 100.000  |

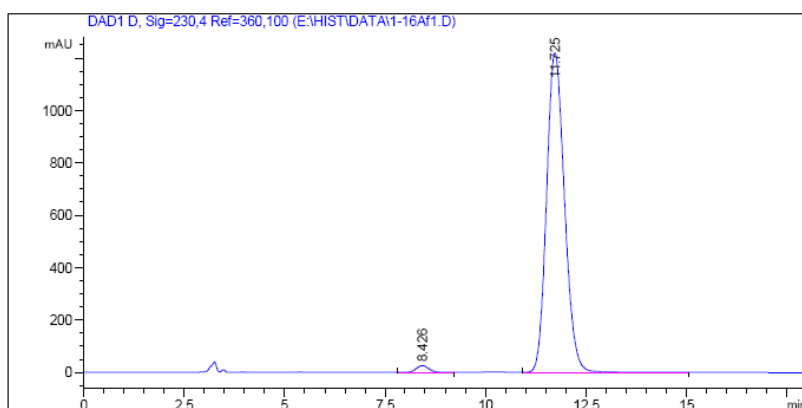

### Results

| Peak No.     | Peak ID | Ret Time (min) | Height (mAU) | Area (mAU*s) | Conc (%) |
|--------------|---------|----------------|--------------|--------------|----------|
| 1            |         | 8.426          | 25.90806     | 557.27307    | 1.4541   |
| 2            |         | 11.725         | 1218.59045   | 3.77665e4    | 98.5459  |
| <b>Total</b> |         |                | 1244.49851   | 3.83238e4    | 100.000  |

#### 4. References

- [1] B. E. Love, P. S. Raje and T. C. Walliams II, *Synlett*, 1994, 493
- [2] F. Xue, X. C. Li and B. S. Wan, *J. Org. Chem.*, 2012, **77**, 3081
- [3] M. Kuriyama, T. Soeta, X. Hao, Q. Chen and K. Tomioka, *J. Am. Chem. Soc.*, 2004, **126**, 8128.
- [4] N. Tokunaga, Y. Otomaru, K. Okamoto, K. Ueyama, R. Shintani and T. Hayashi, *J. Am. Chem. Soc.*, 2004, **126**, 13584.
- [5] H. F. Duan, Y. X. Jia, L. X. Wang and Q. L. Zhou, *Org. Lett.*, 2006, **8**, 2567.
- [6] Z. Q. Wang, C. G. Feng, M. H. Xu and G. Q. Lin, *J. Am. Chem. Soc.*, 2007, **129**, 5336;
- [7] C. C. Chen, B. Gopula, J. F. Syu, J. H. Pan, T. S. Kuo, P. Y. Wu, J. P. Henschke and H. L. Wu, *J. Org. Chem.*, 2014, **79**, 8077
- [8] G. Z. Zhao, G. Sipos, A. Salvador, A. Ou, P. C. Gao, B. W. Skelton and R. Dorta, *Adv. Synth. Catal.*, 2016, **358**, 1759.
- [9] X. Gao, B. Wu, Z. Yan and Y. G. Zhou, *Org. Biomol. Chem.*, 2016, **14**, 55.
- [10] H. Y. Shan, Q. X. Zhou, J. L. Yu, S. Q. Zhang, X. Hong and X. F. Lin, *J. Org. Chem.*, 2018, **83**, 11873.

## 5. Copies of $^1\text{H}$ and $^{13}\text{C}$ NMR spectra of the obtained adducts

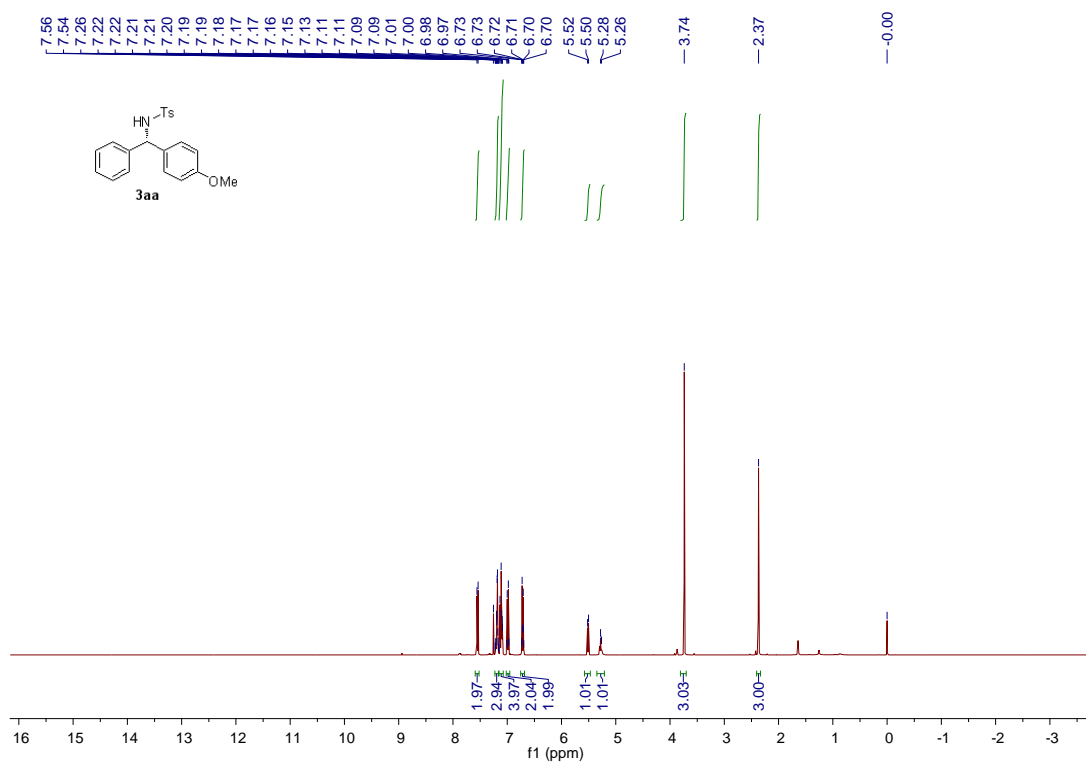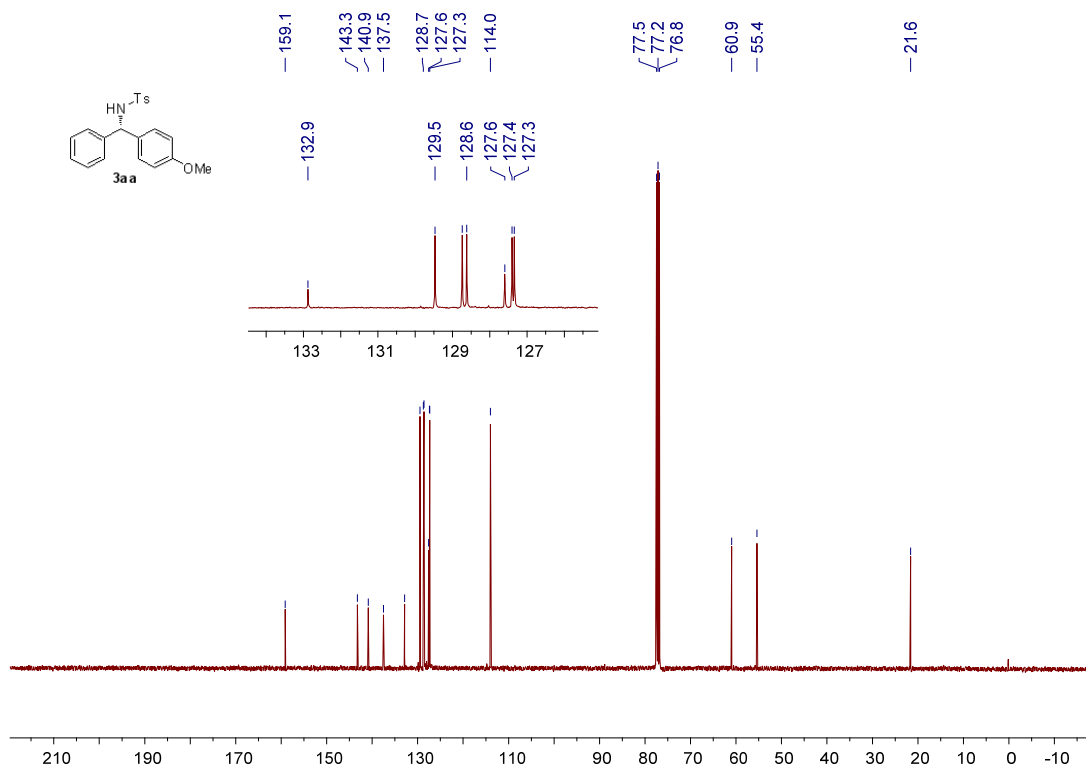

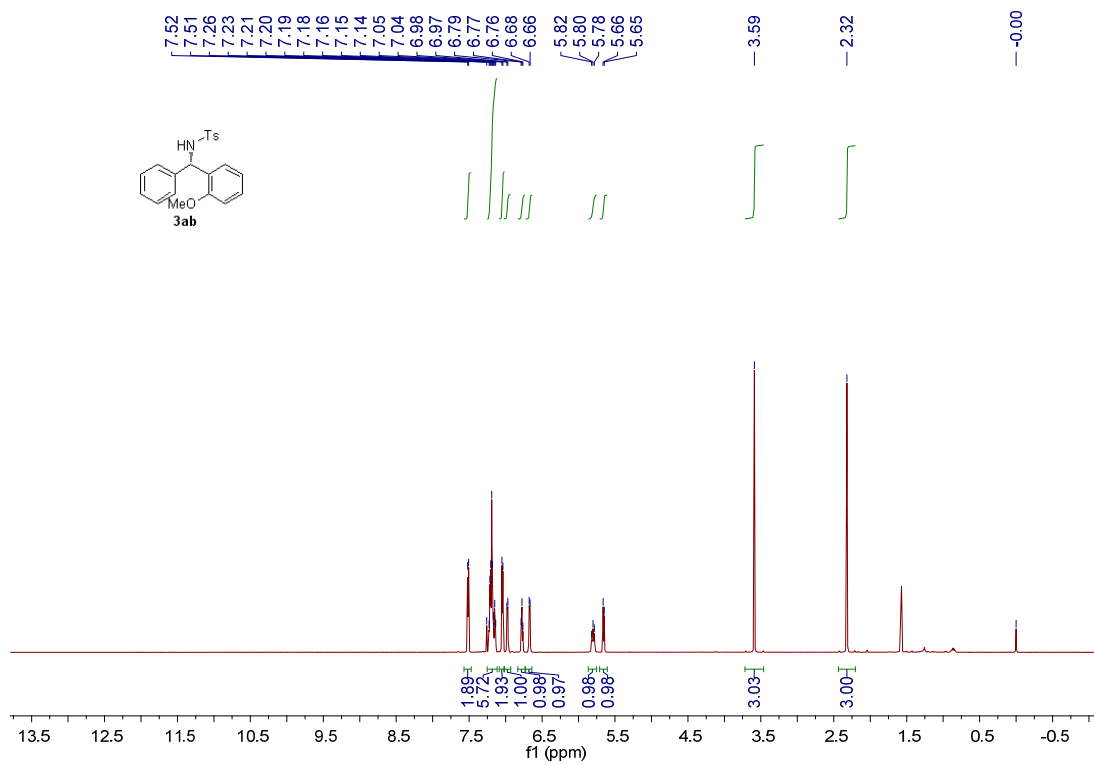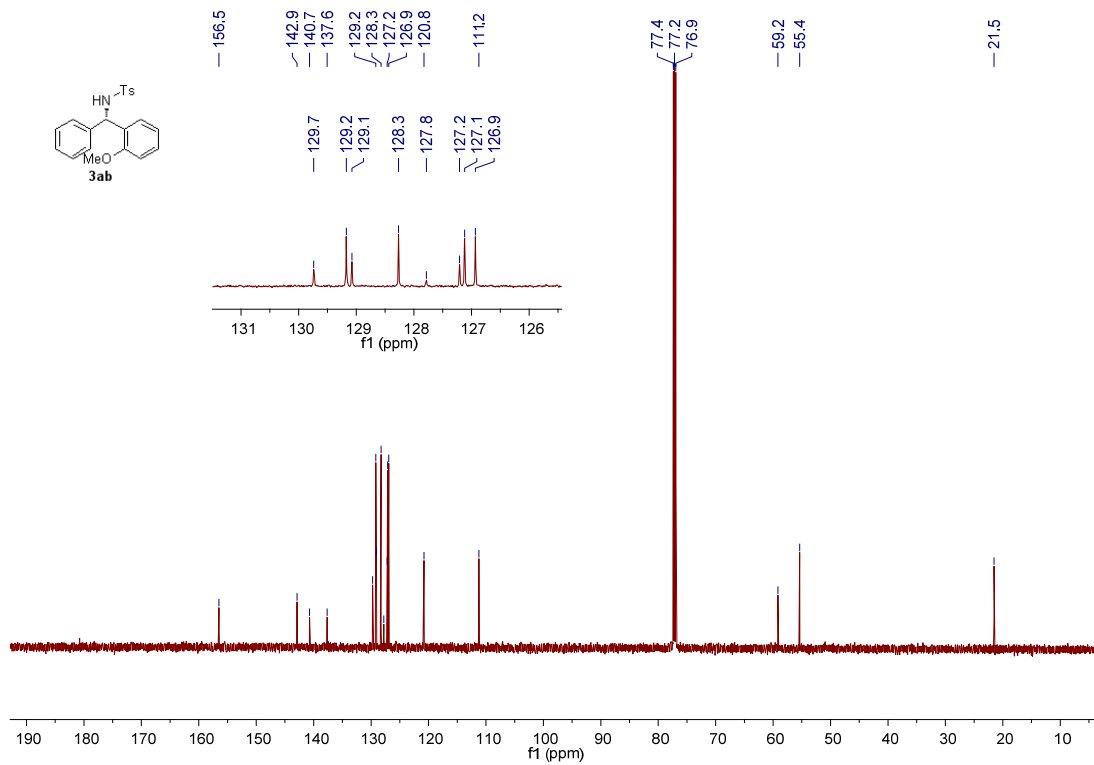



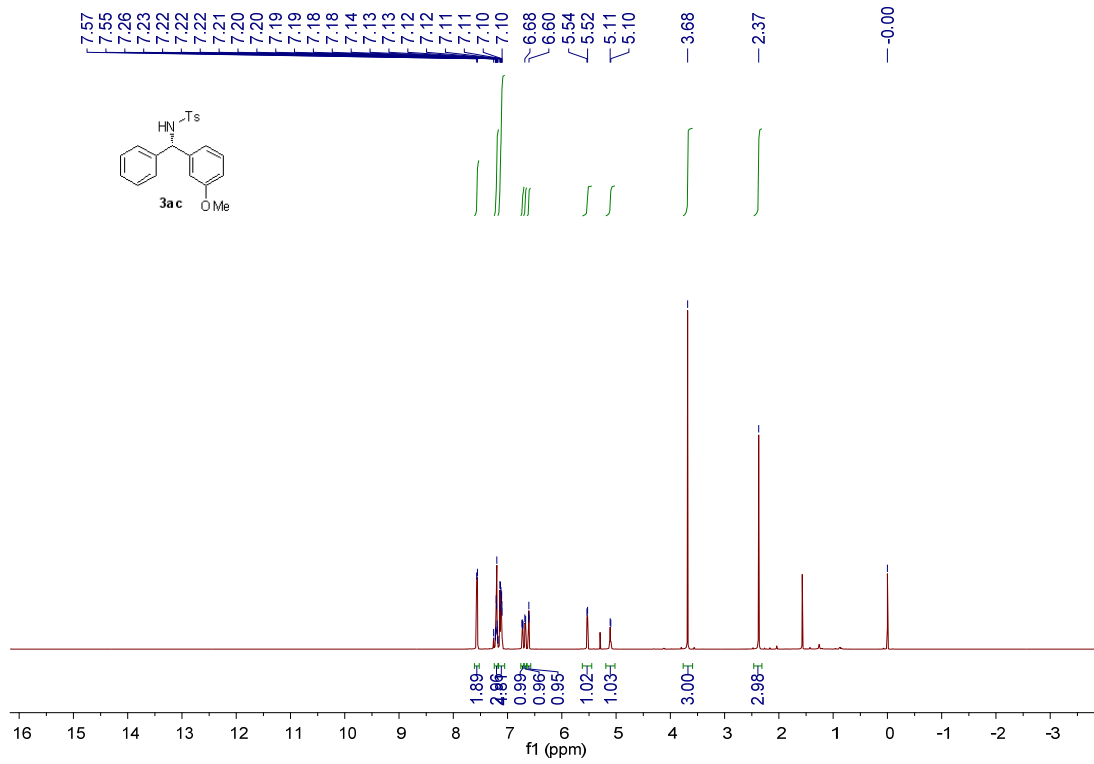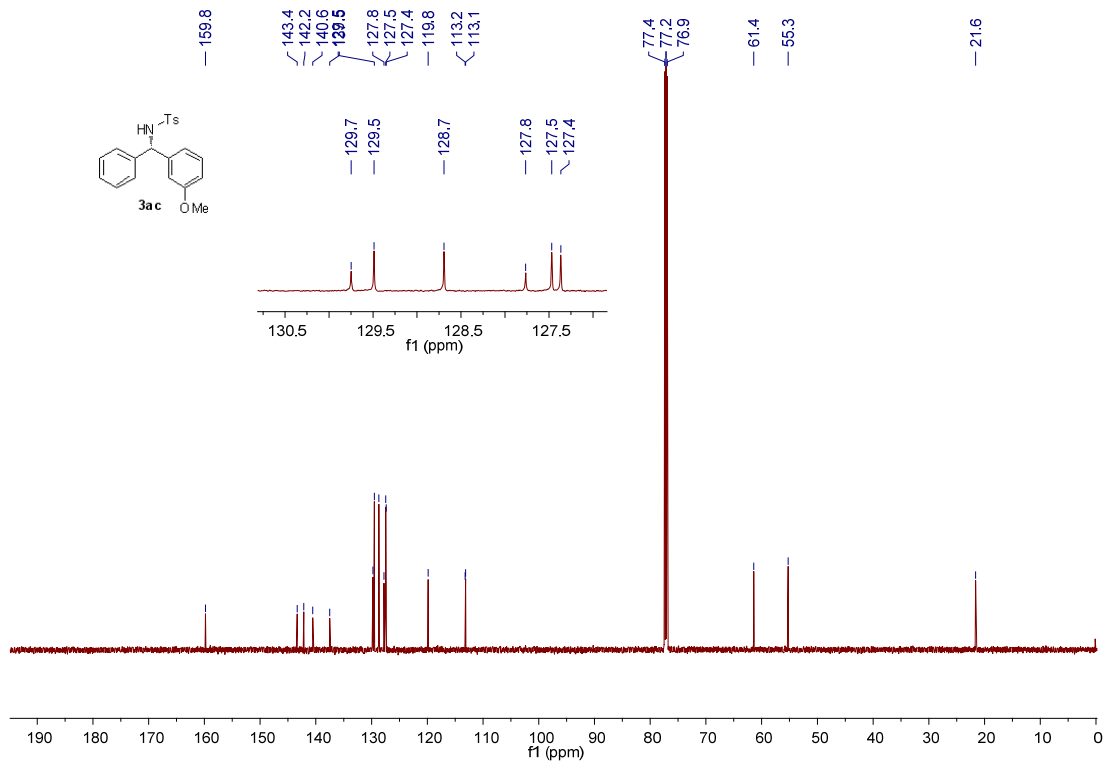

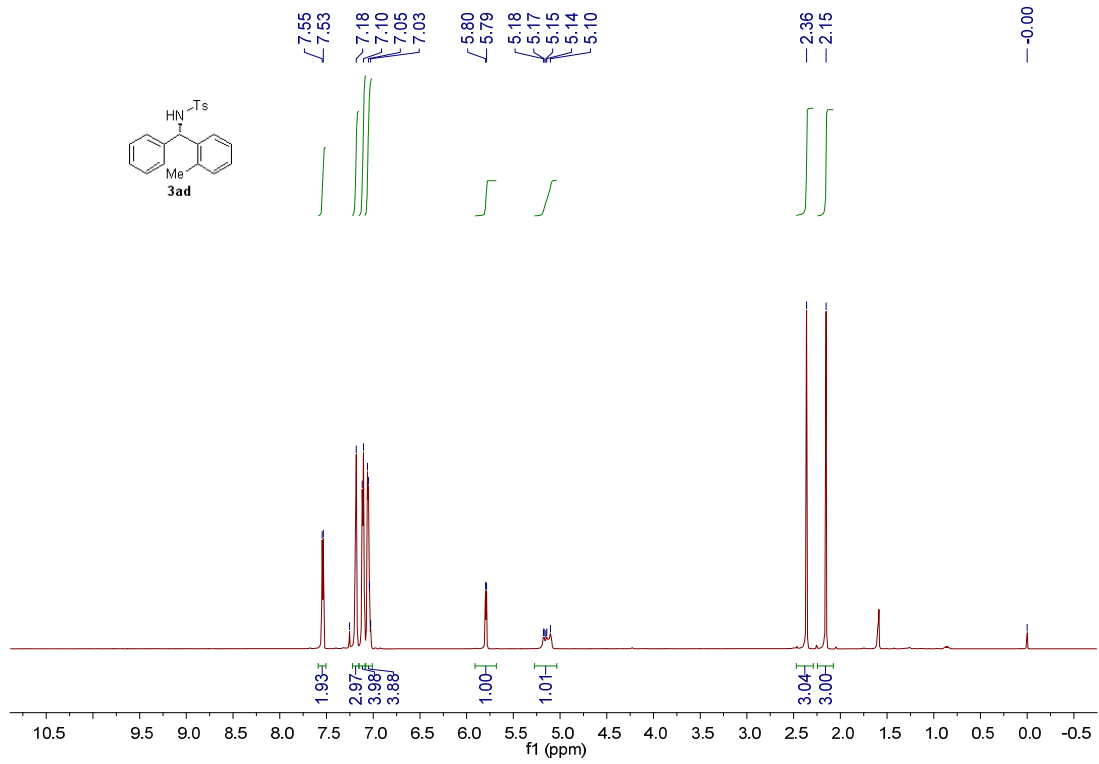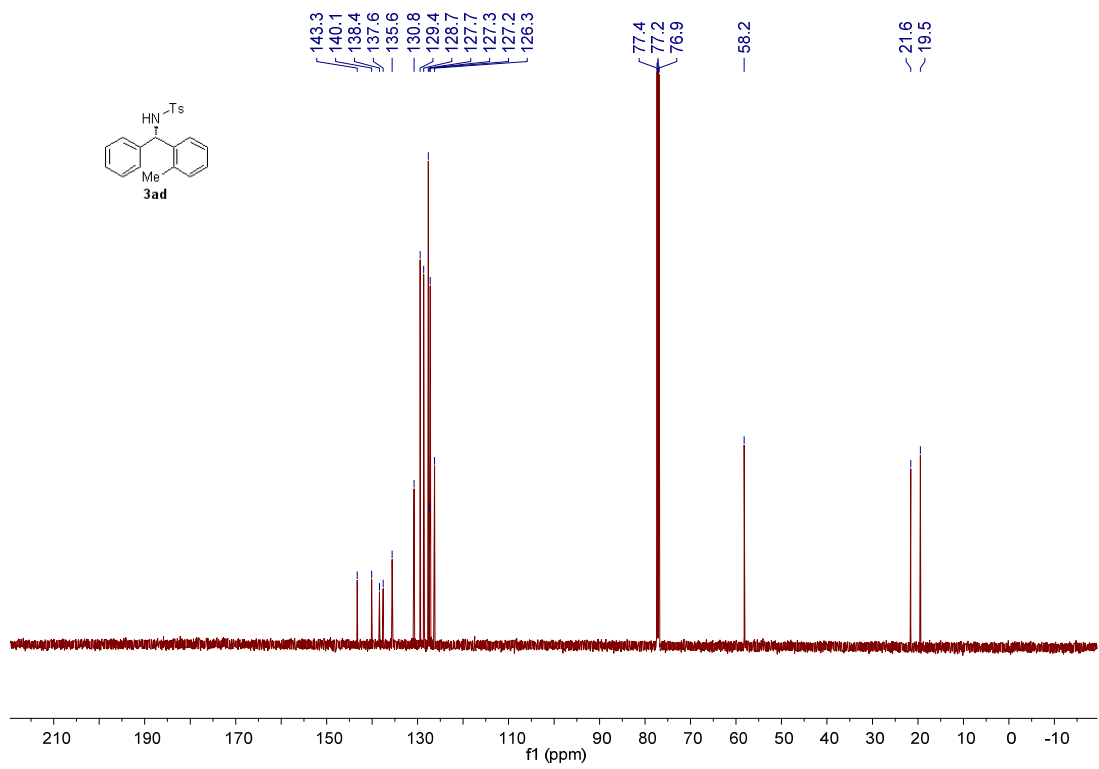

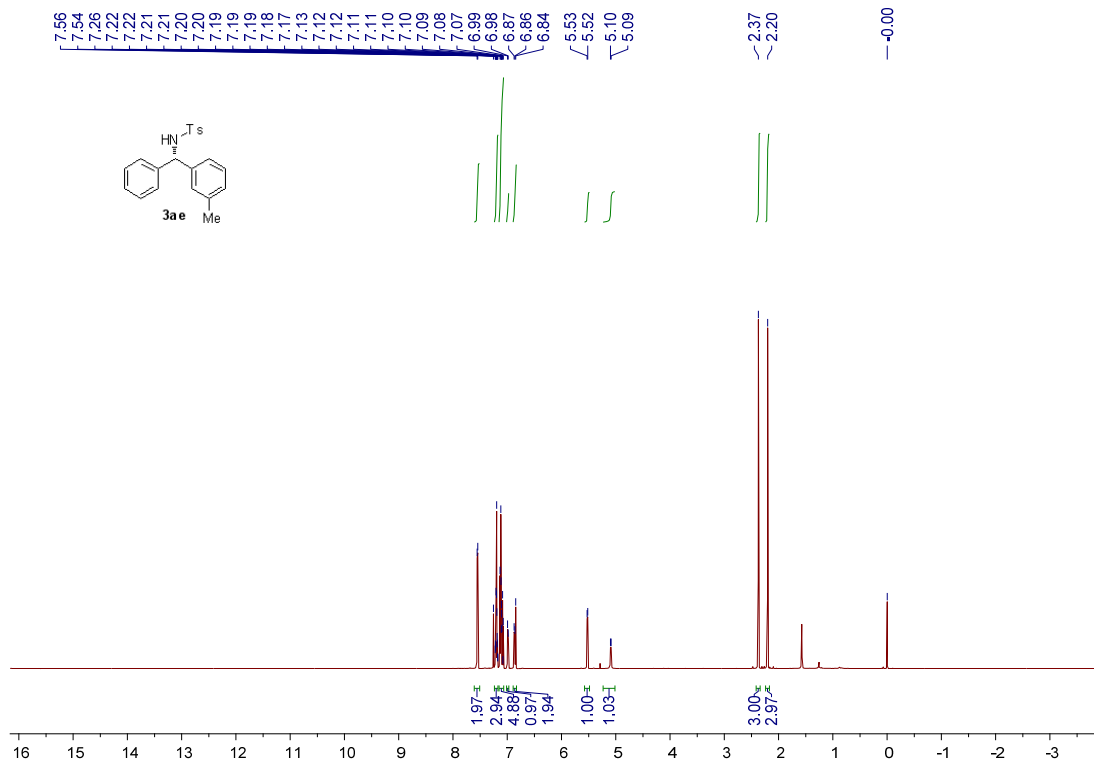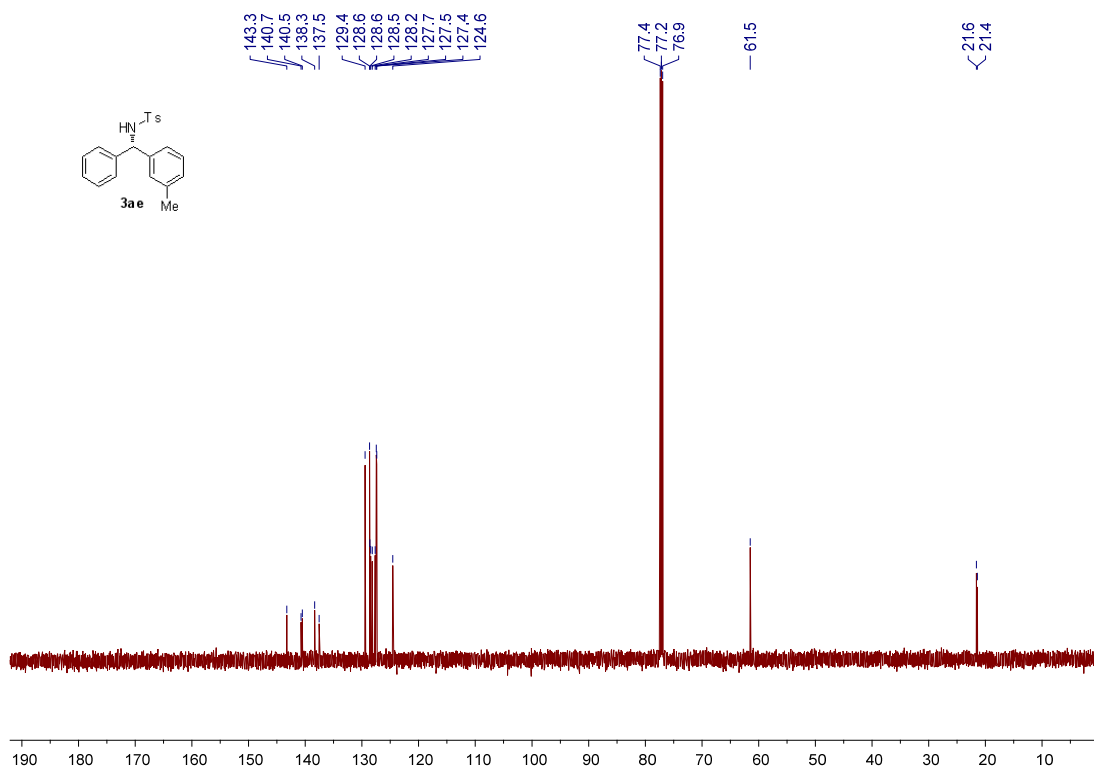

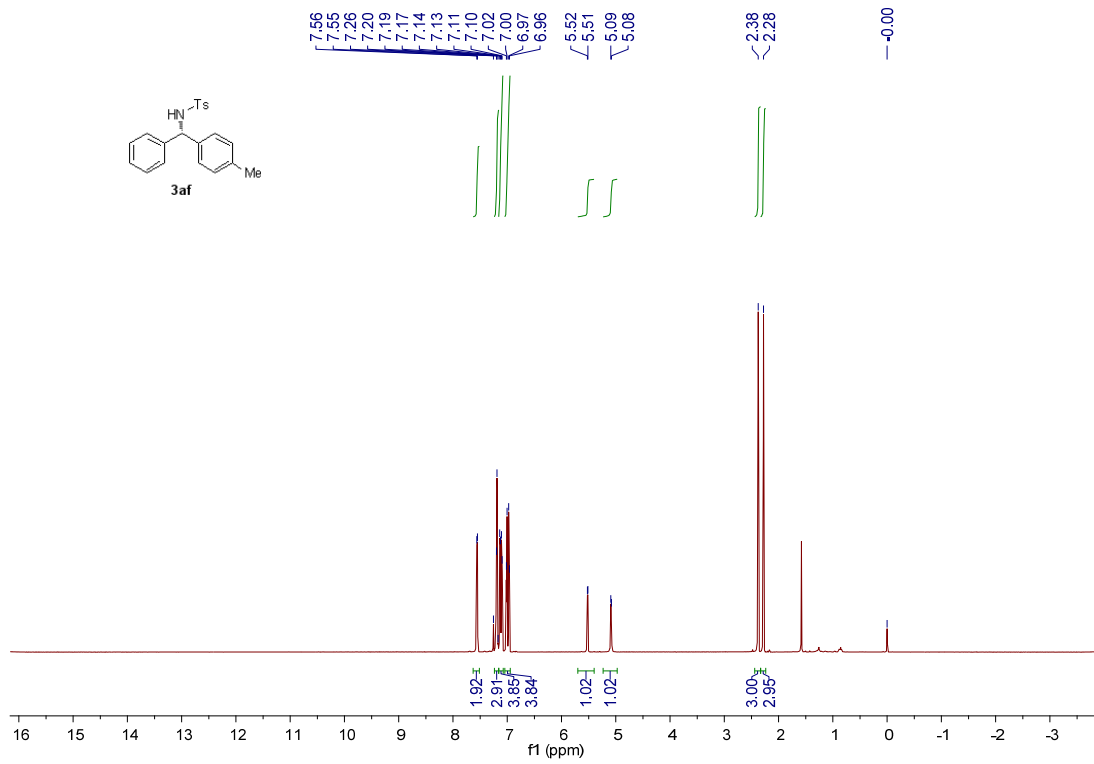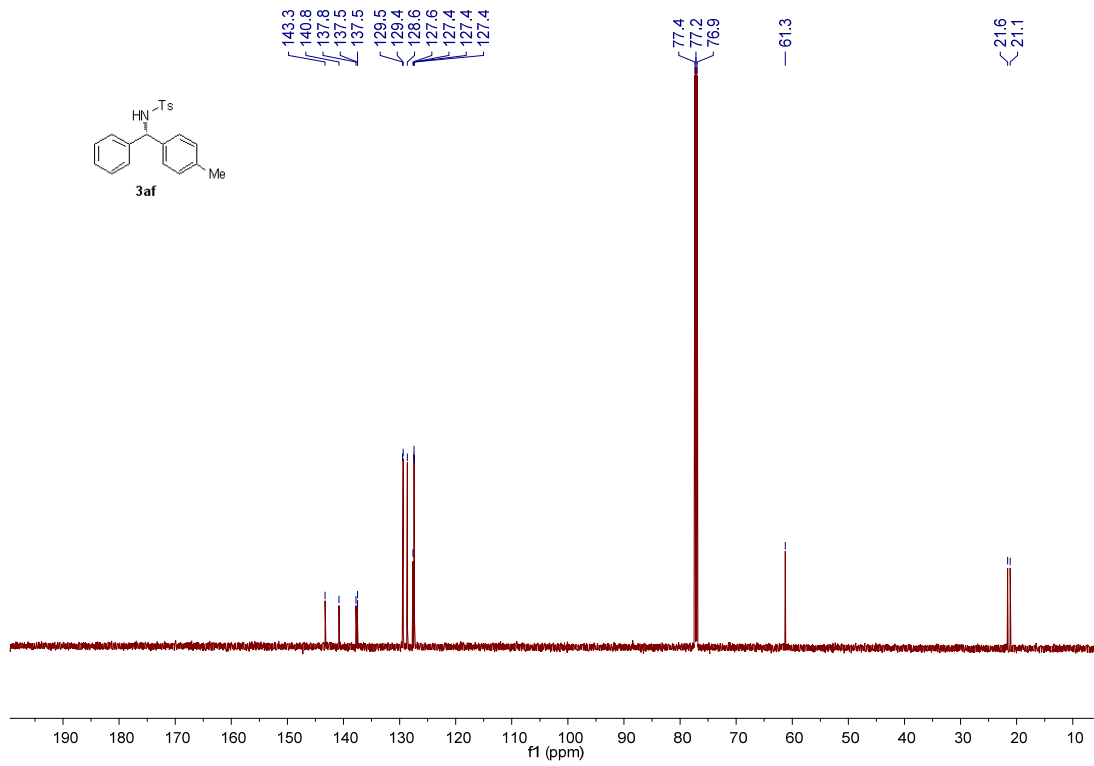

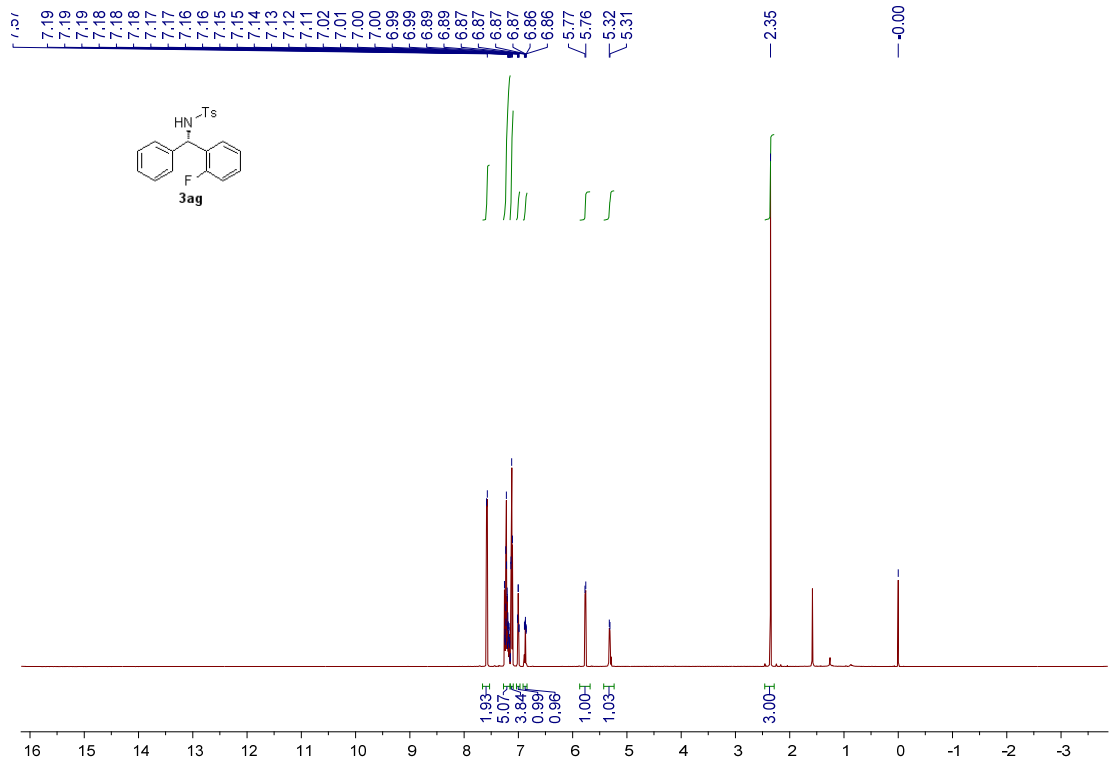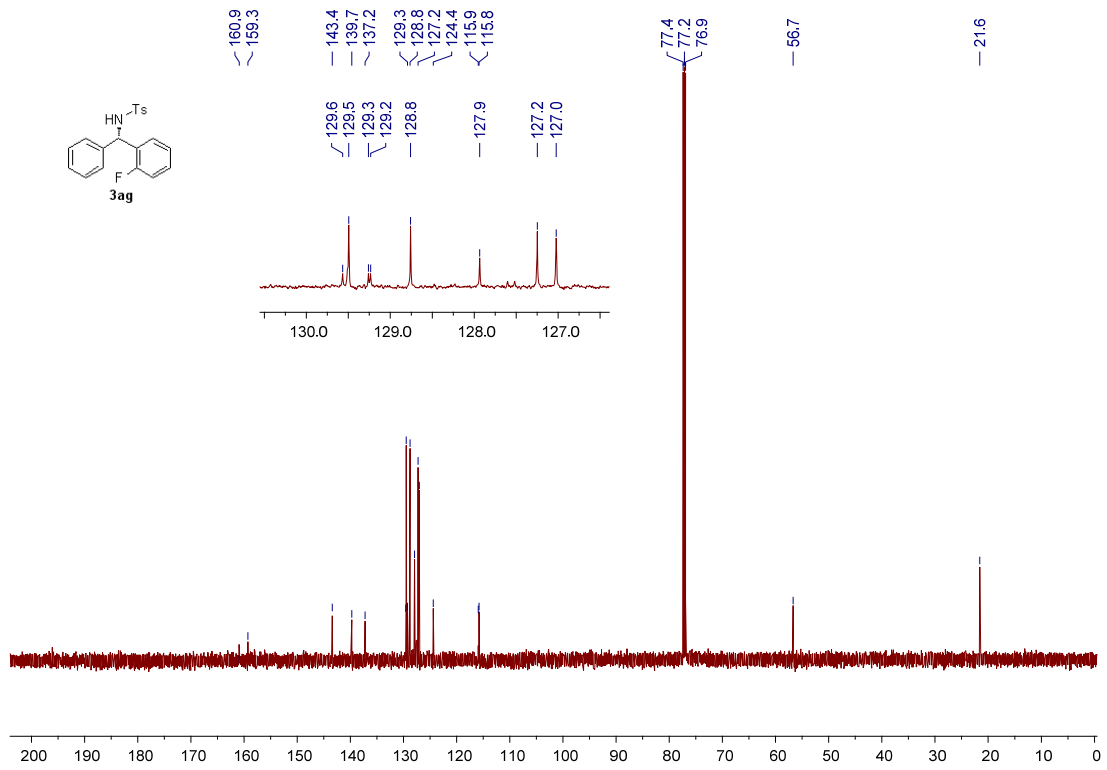

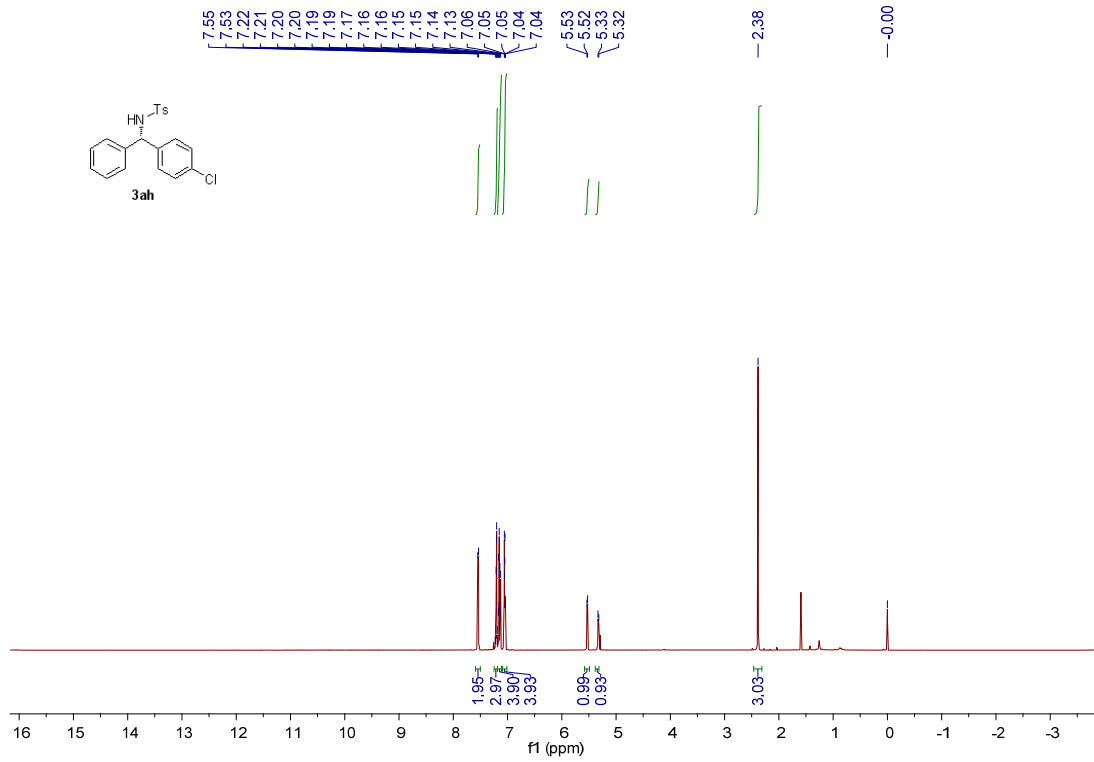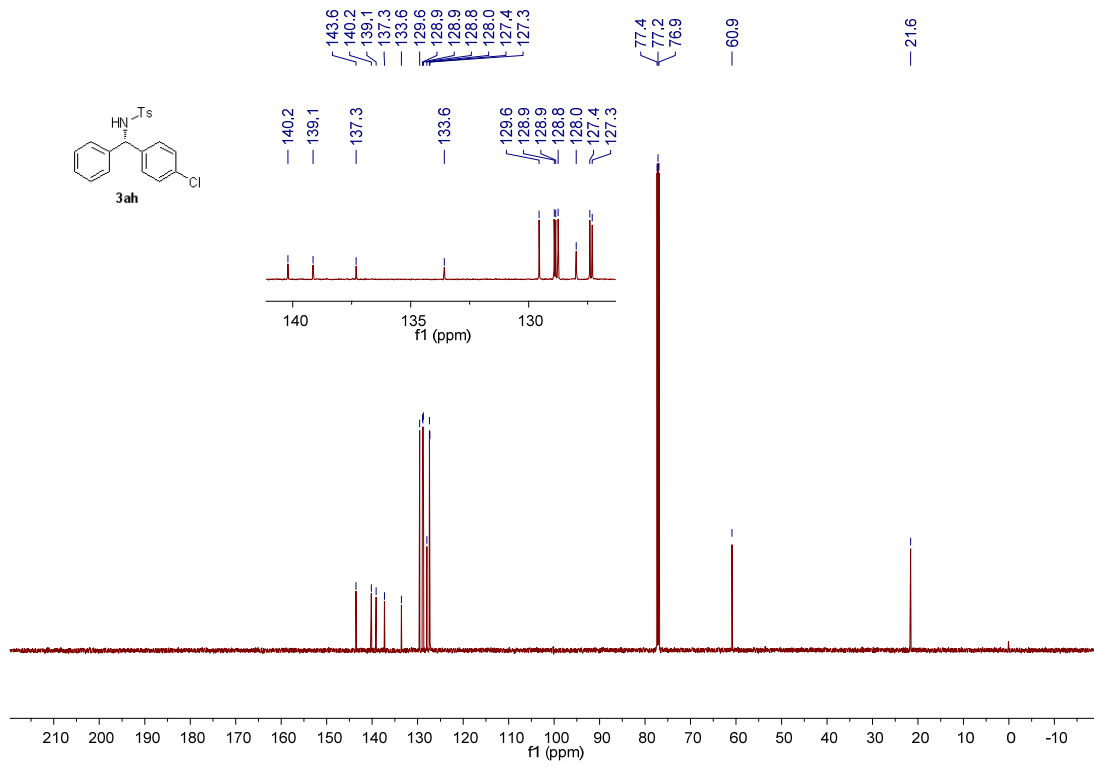

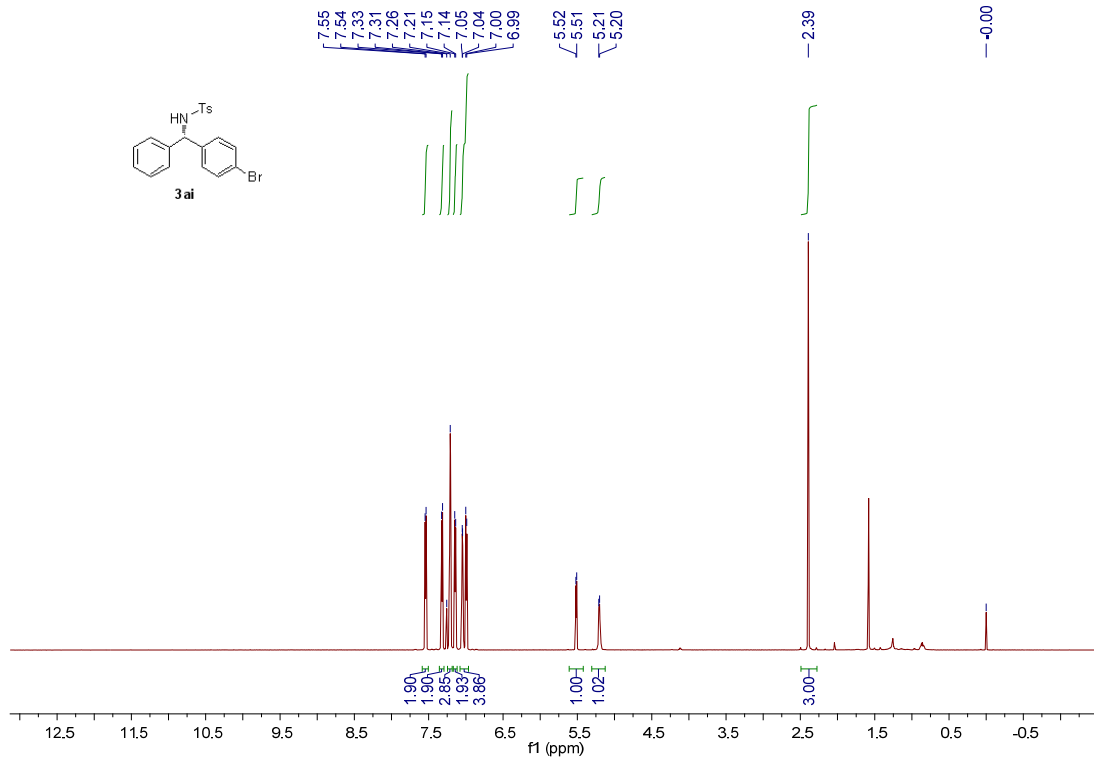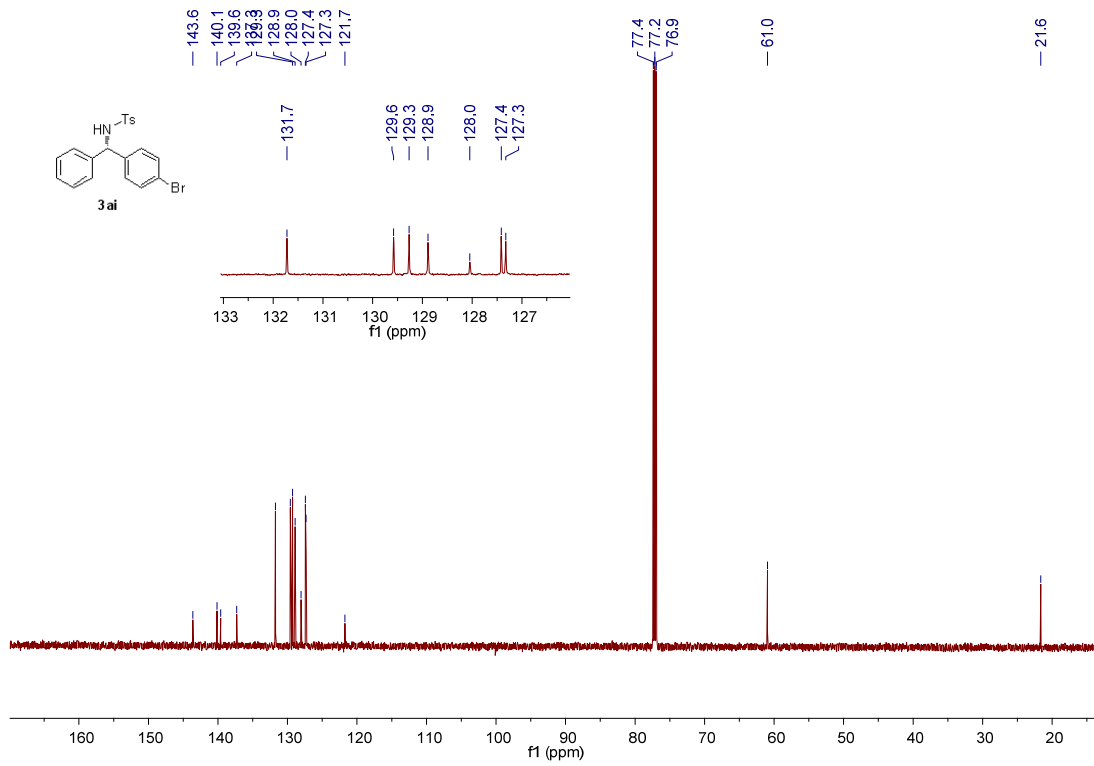

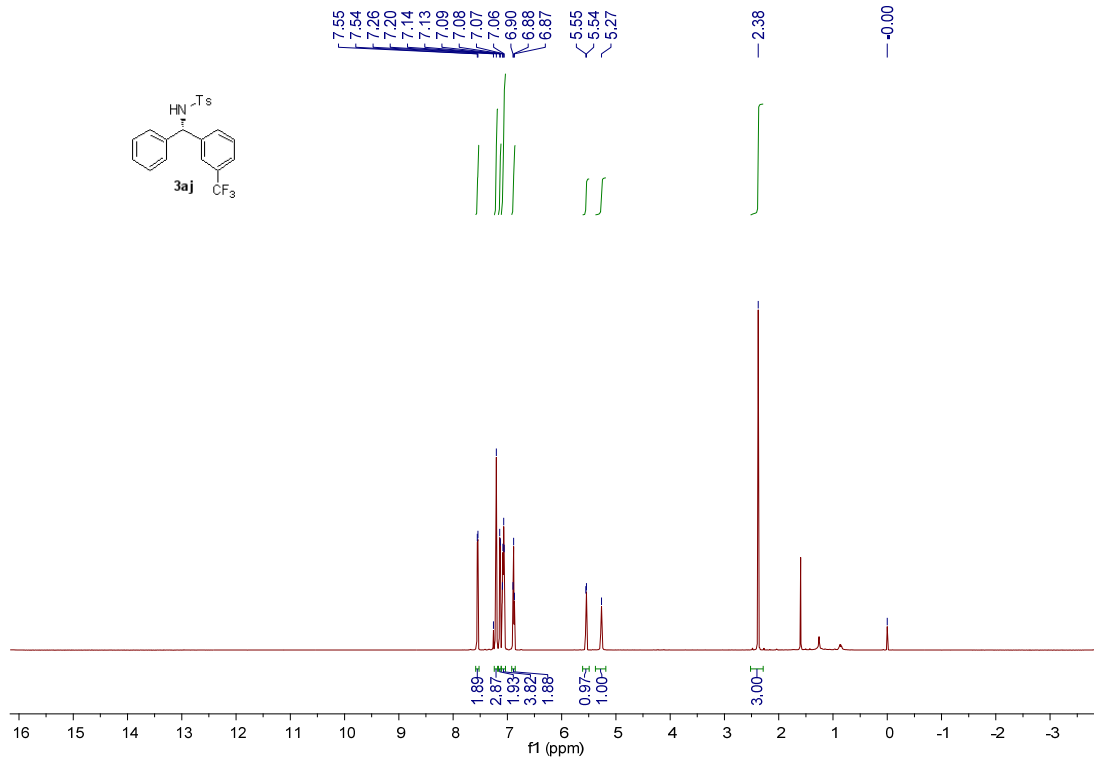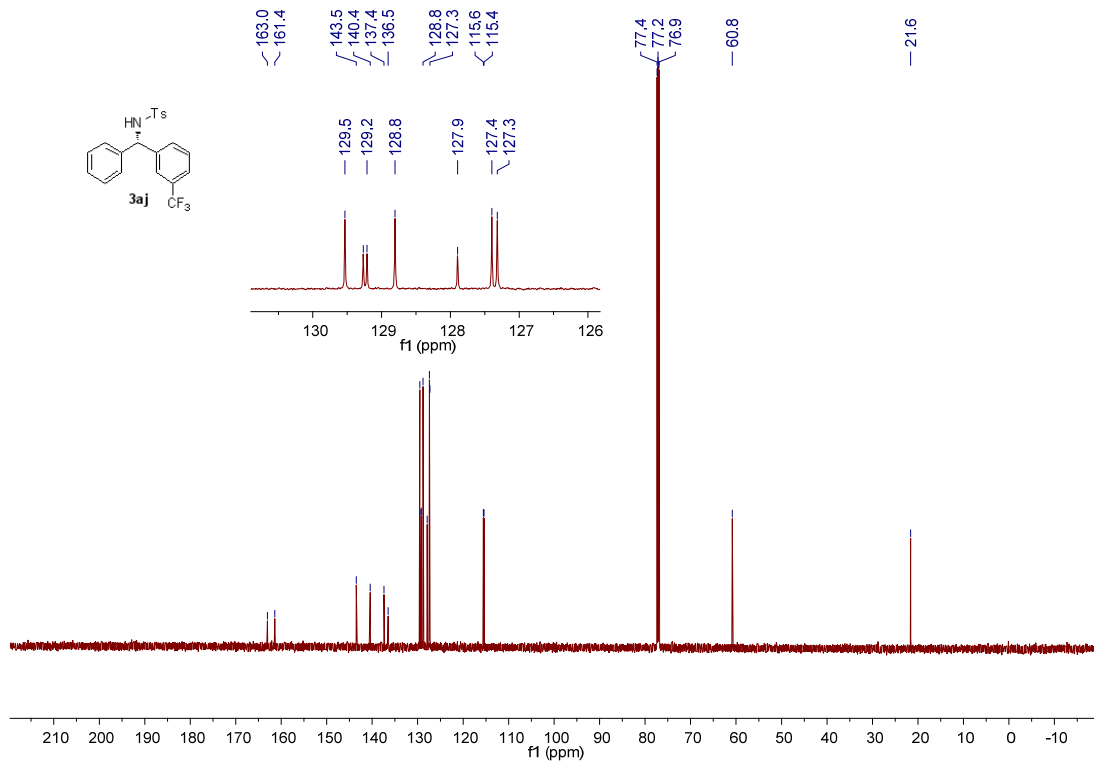



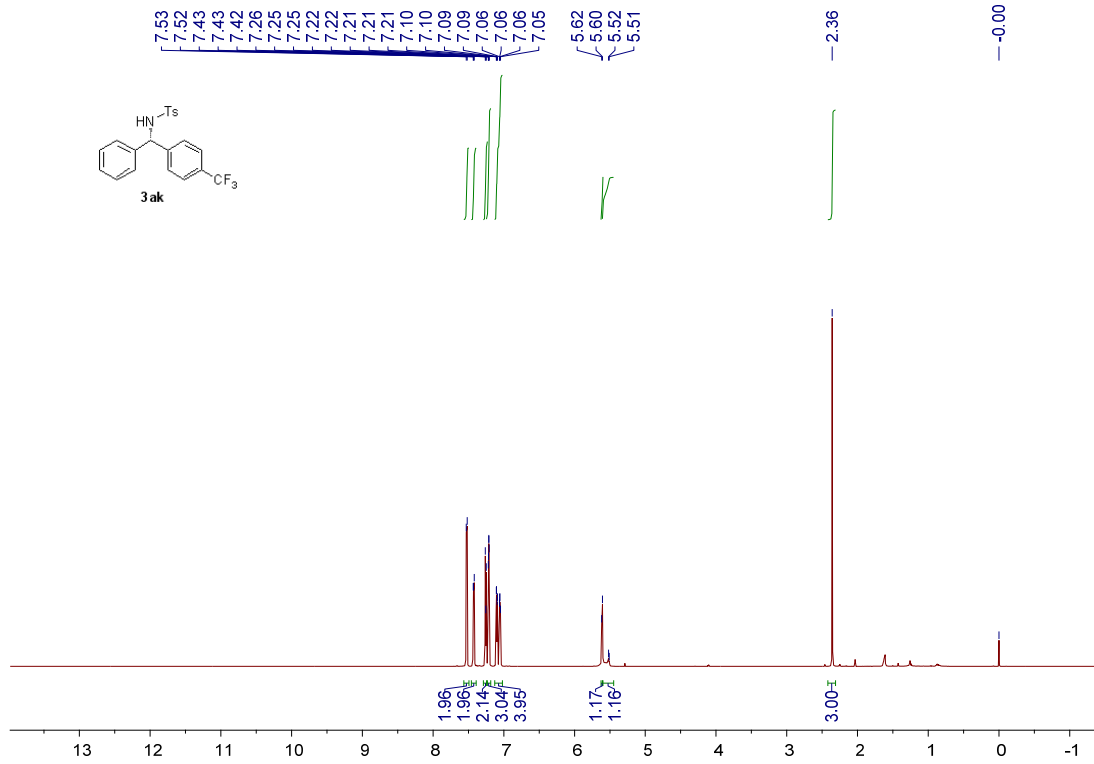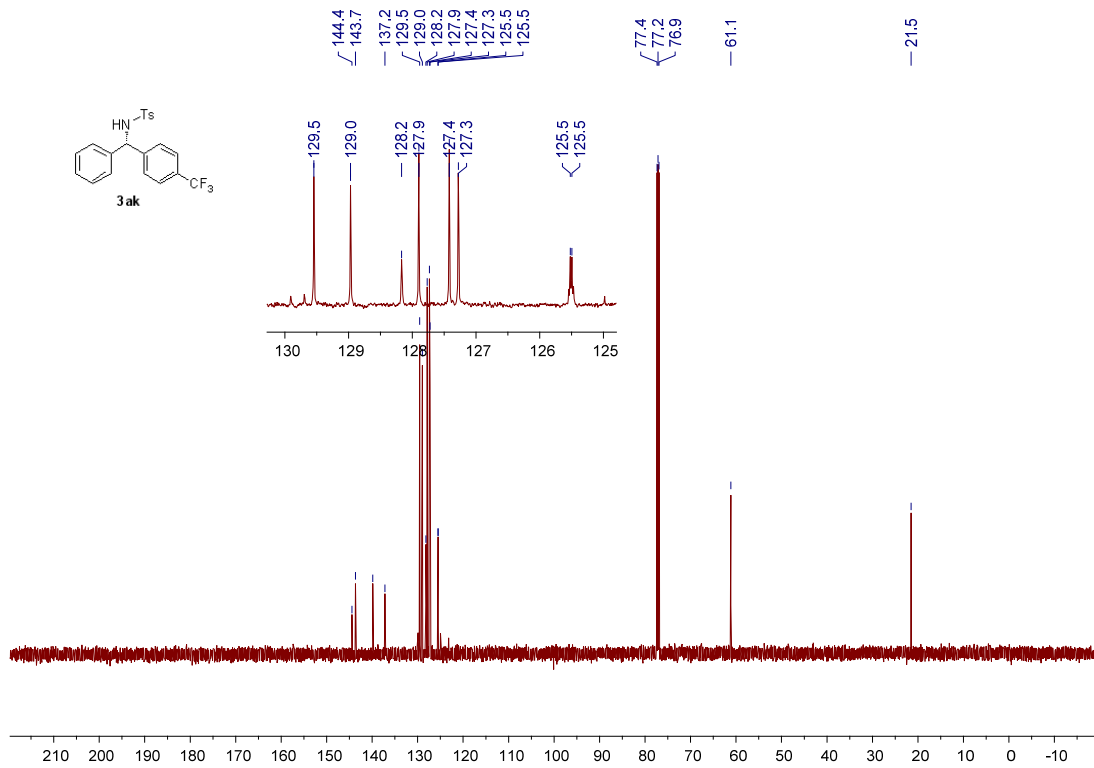

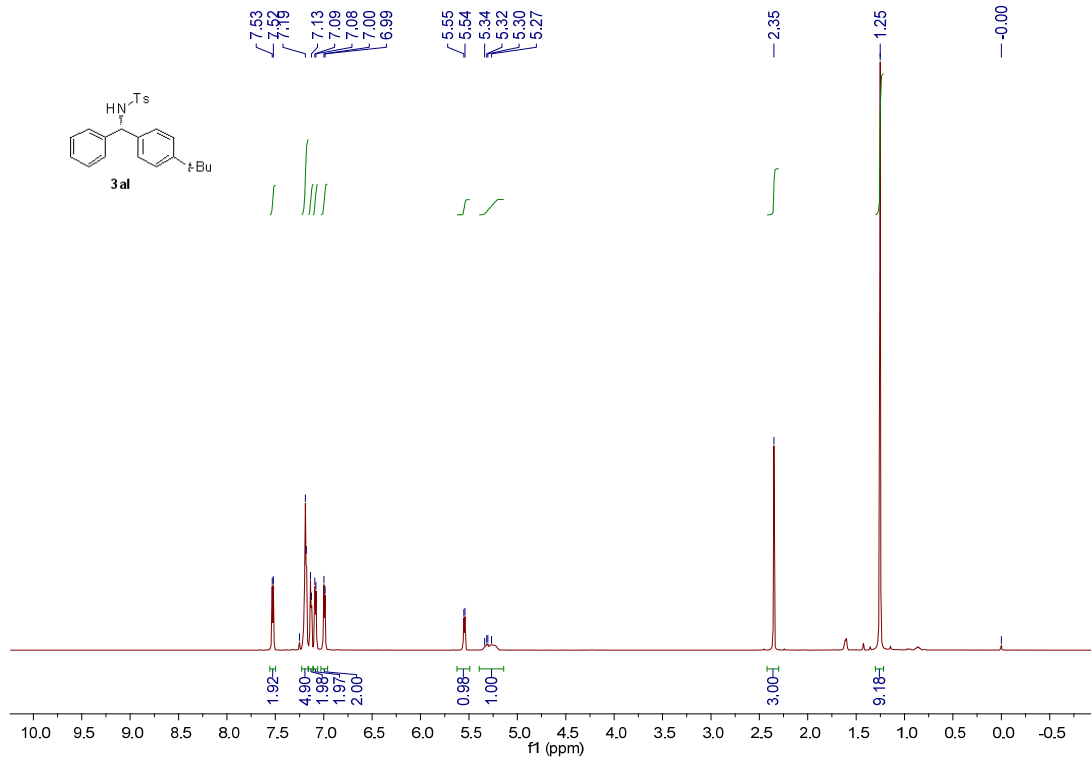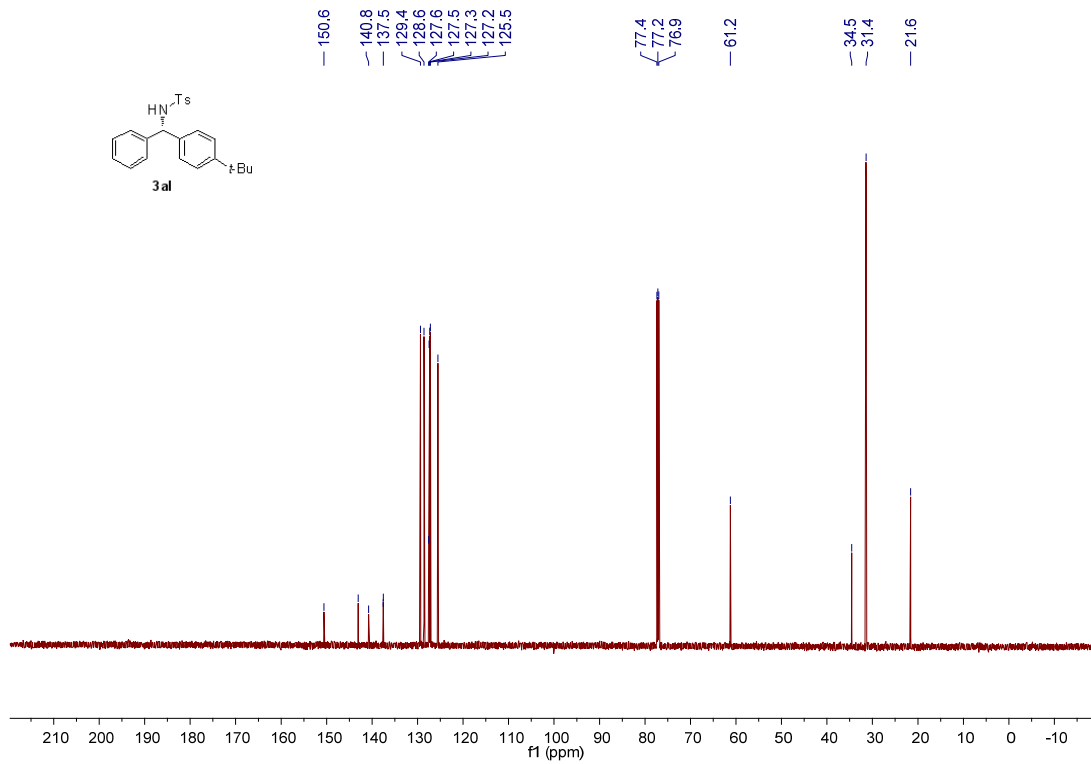

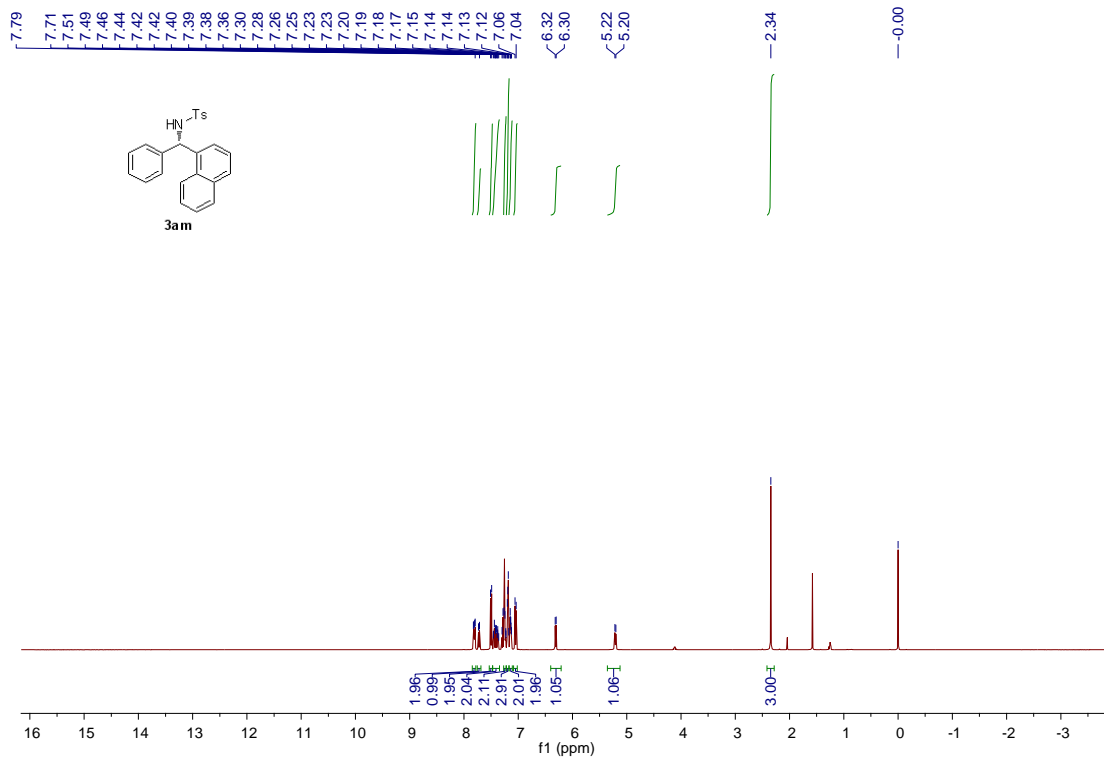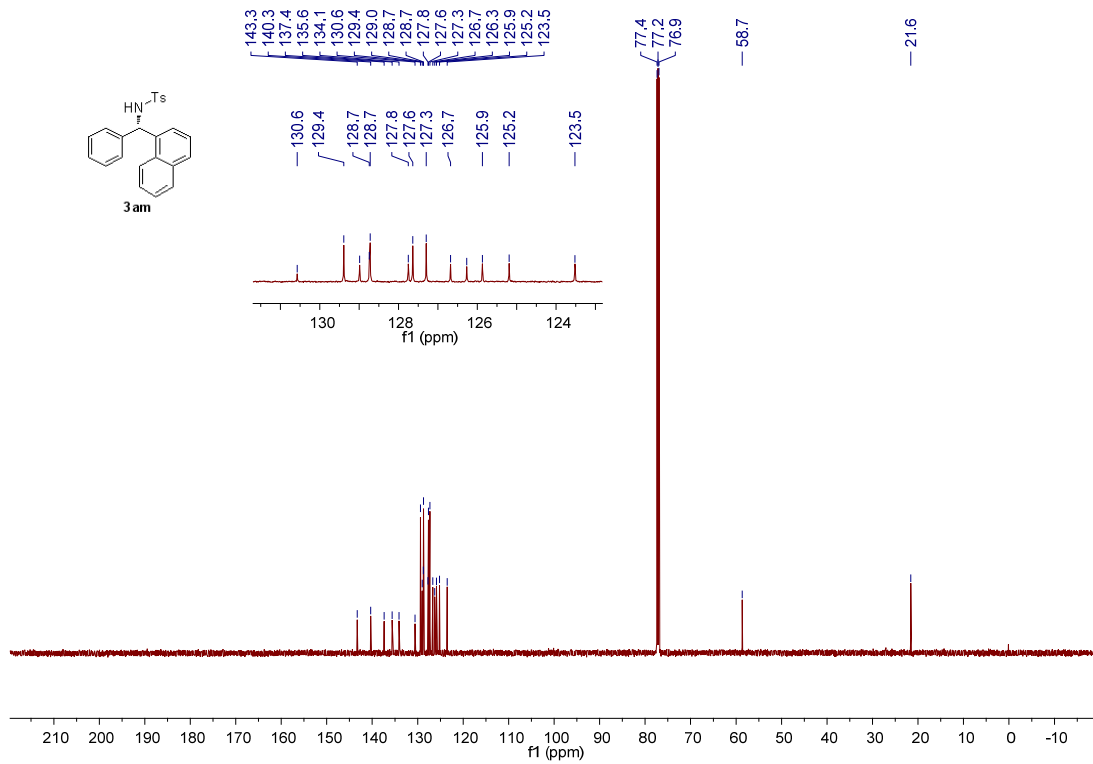

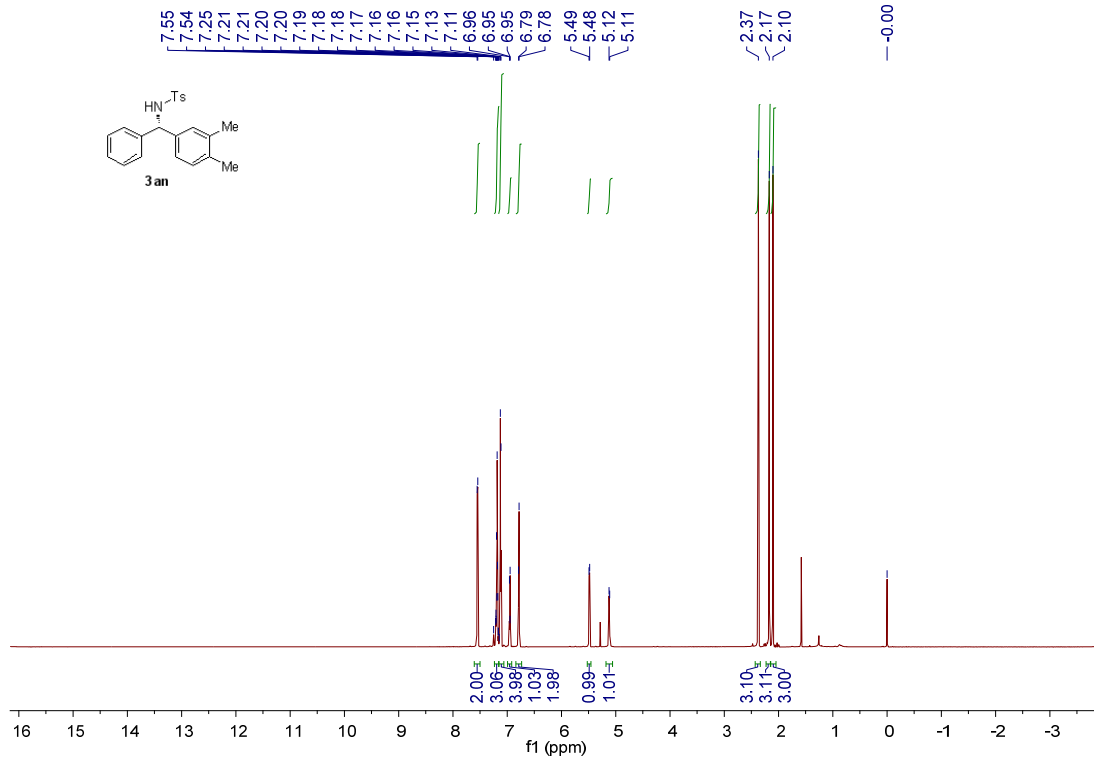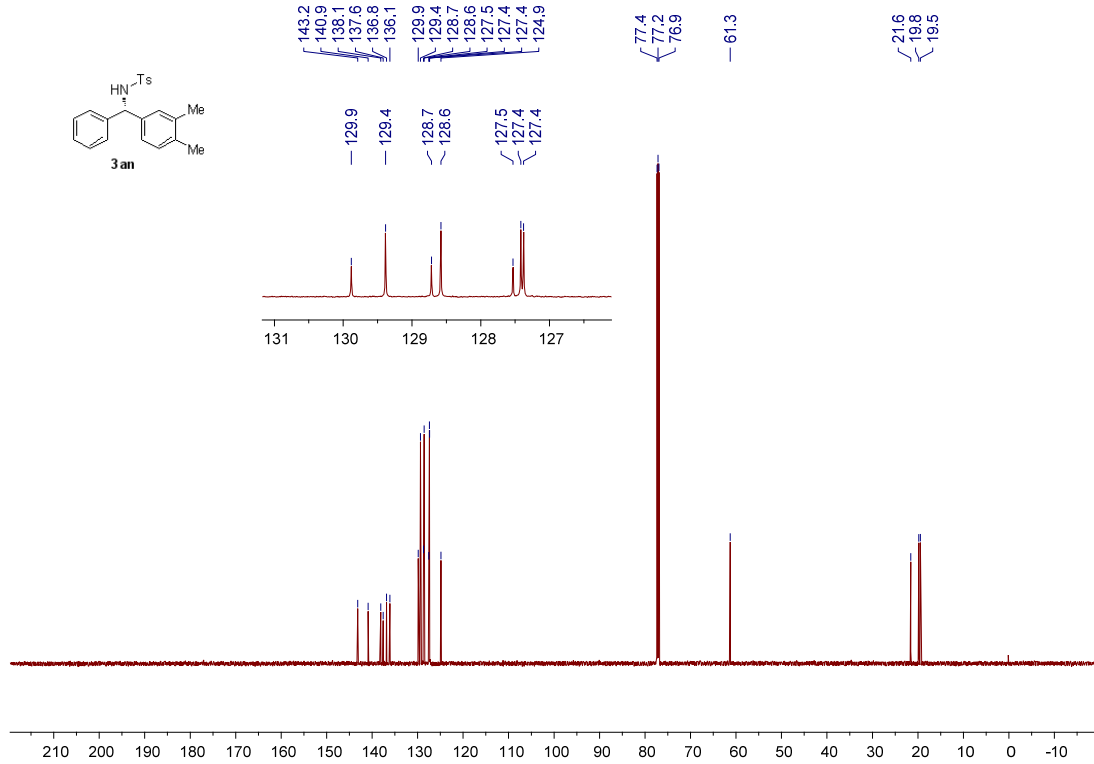

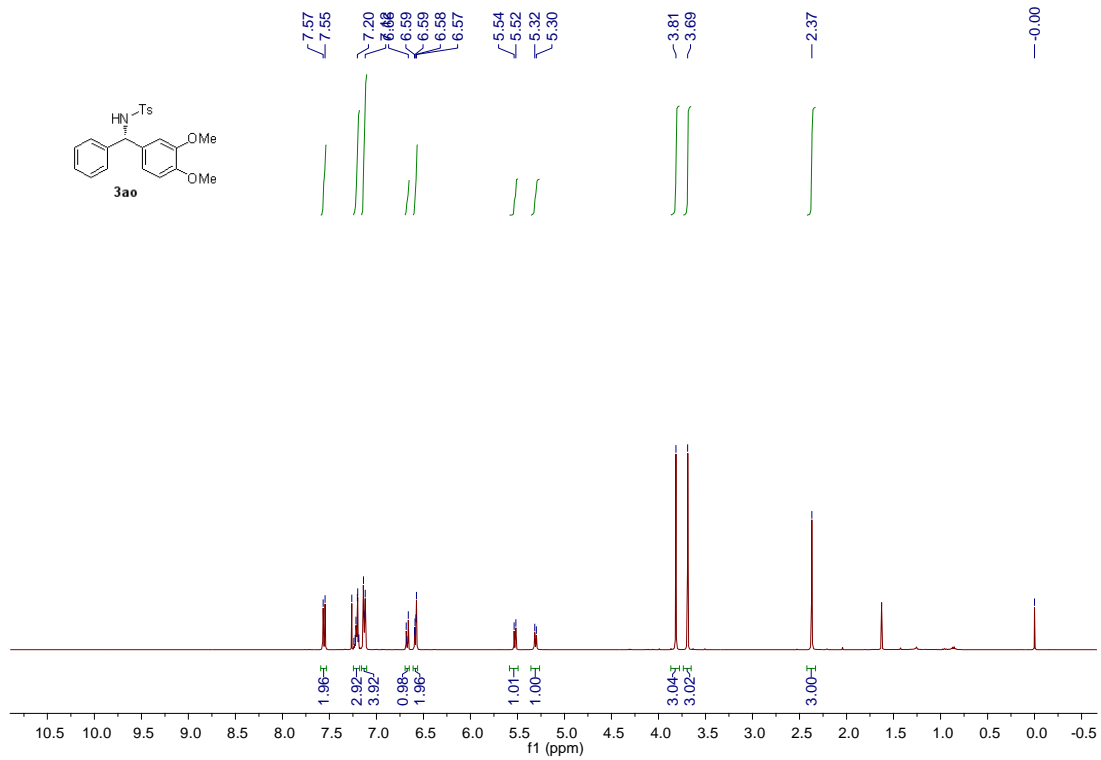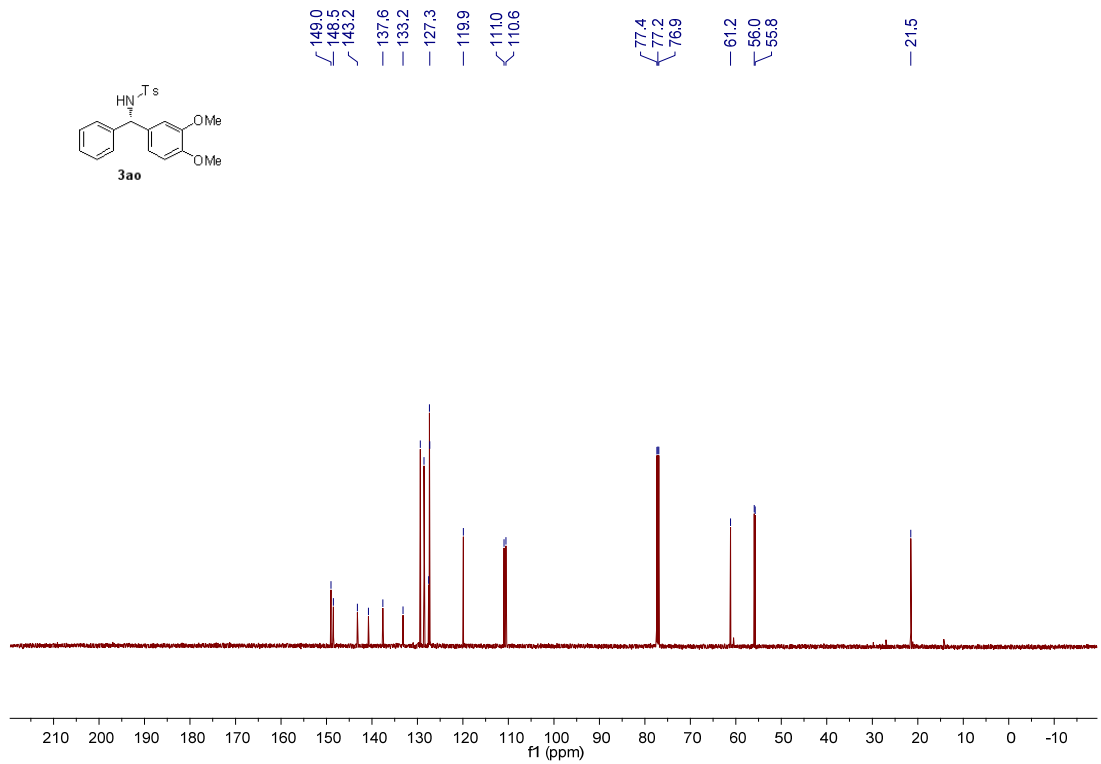

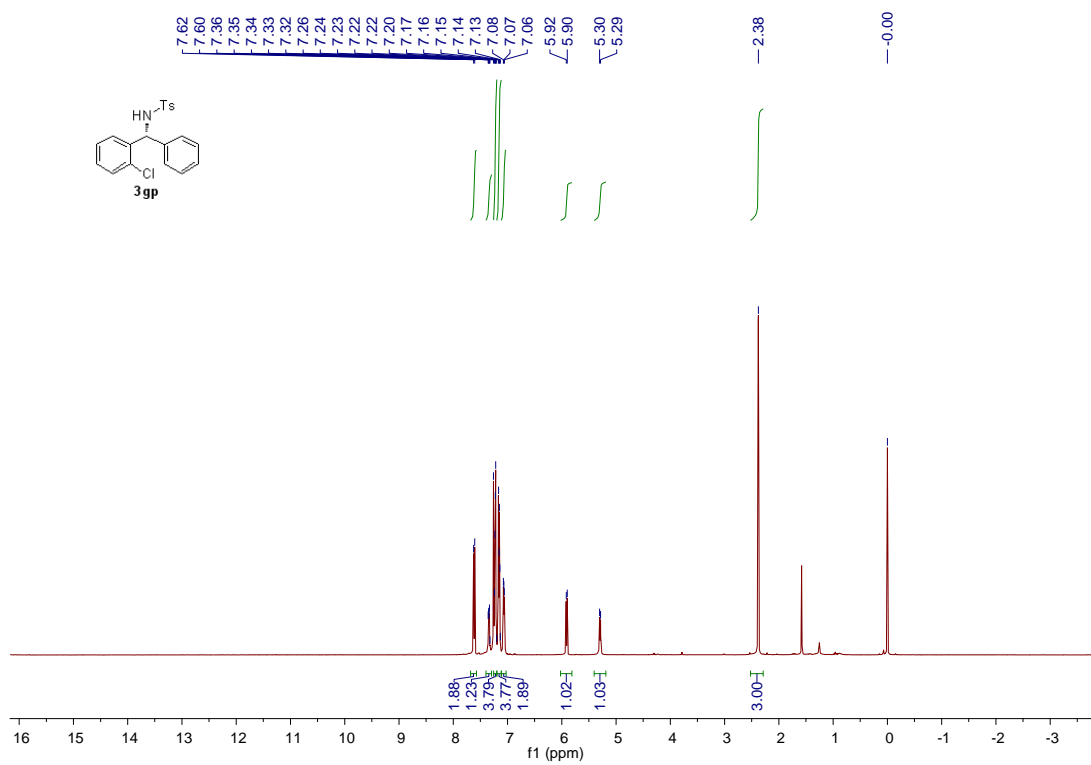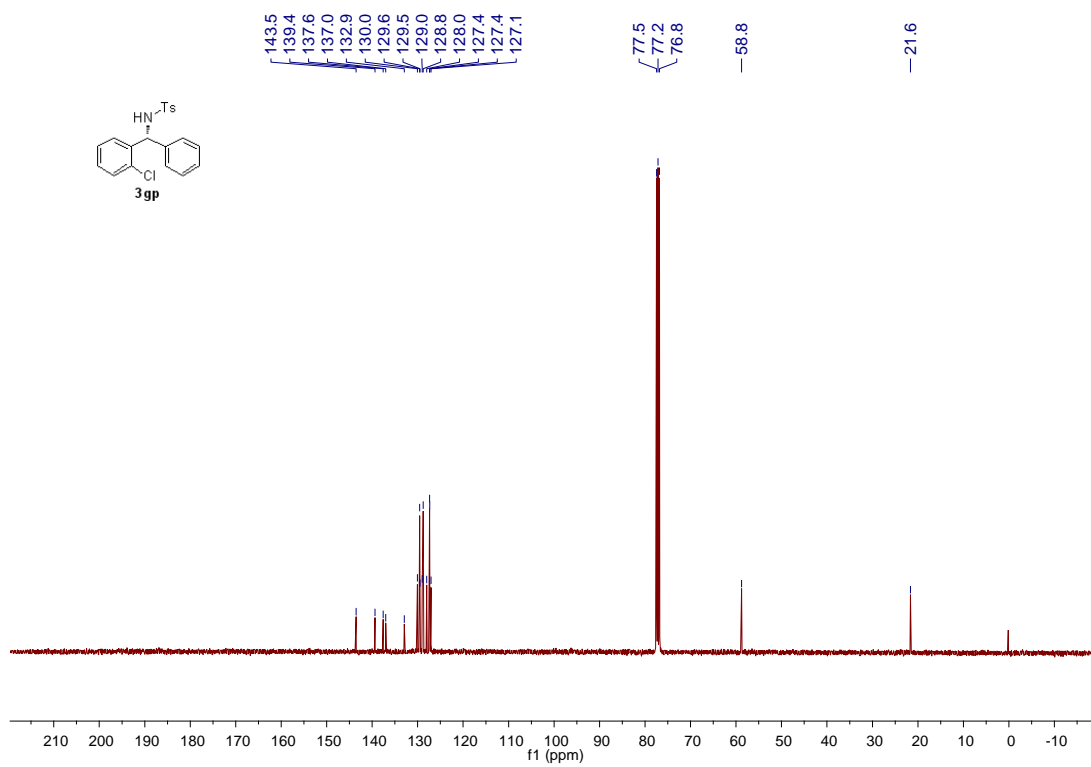

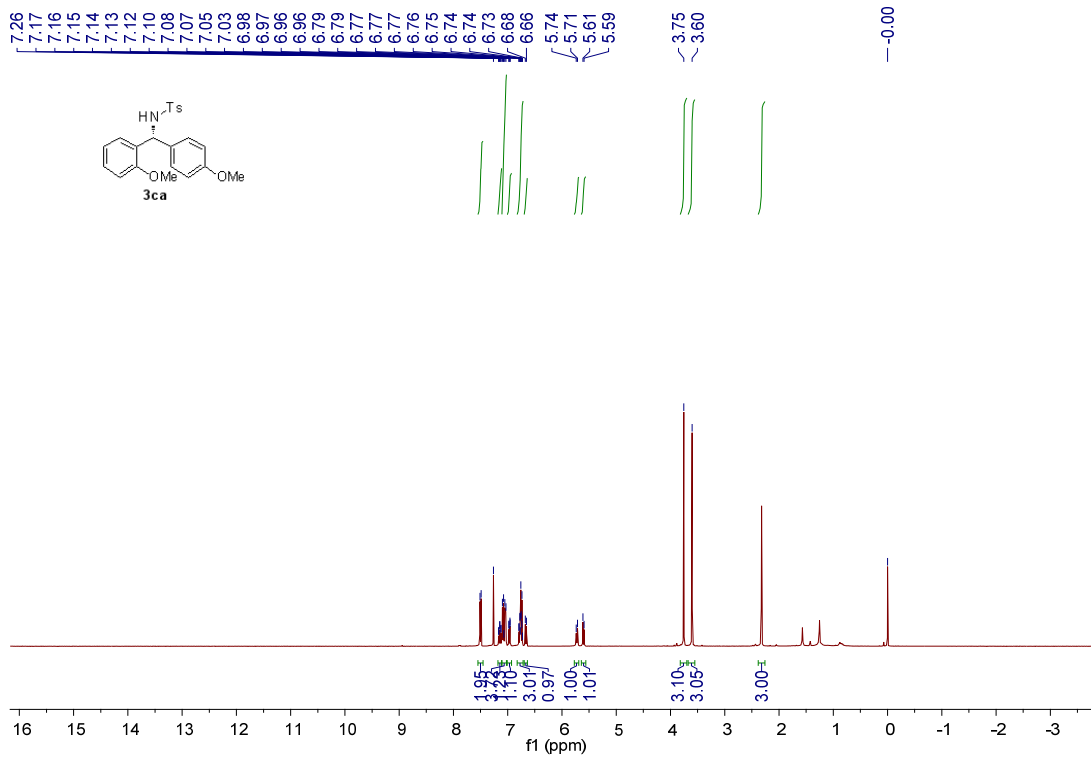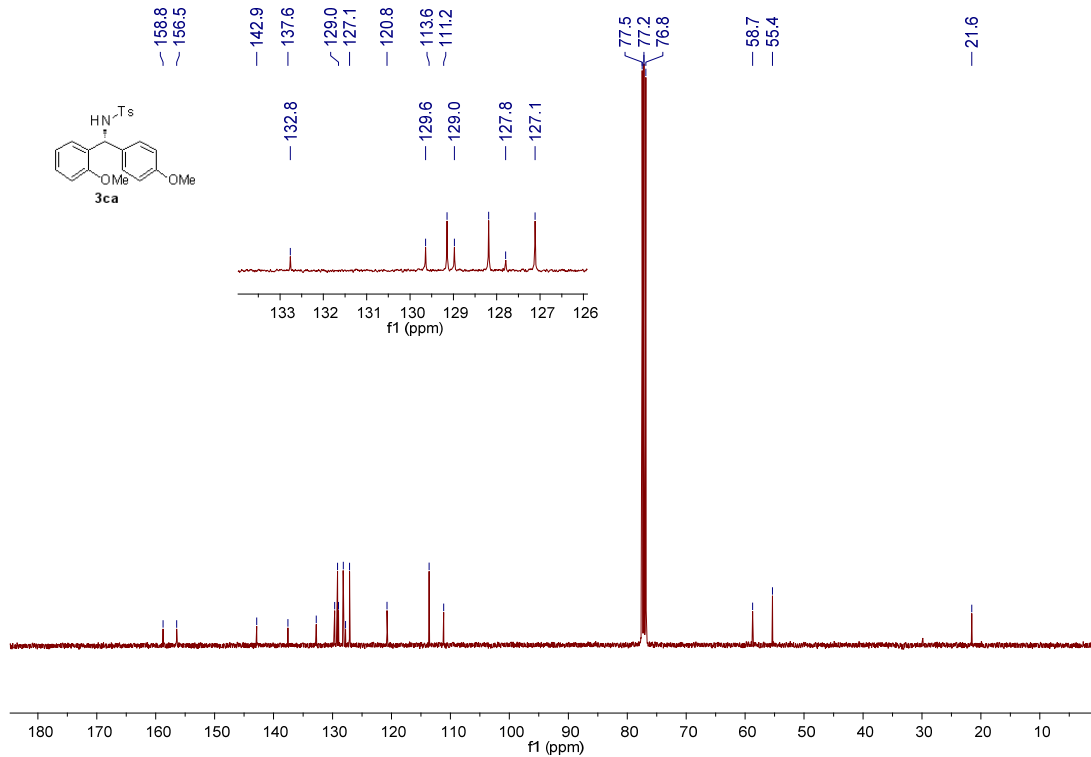

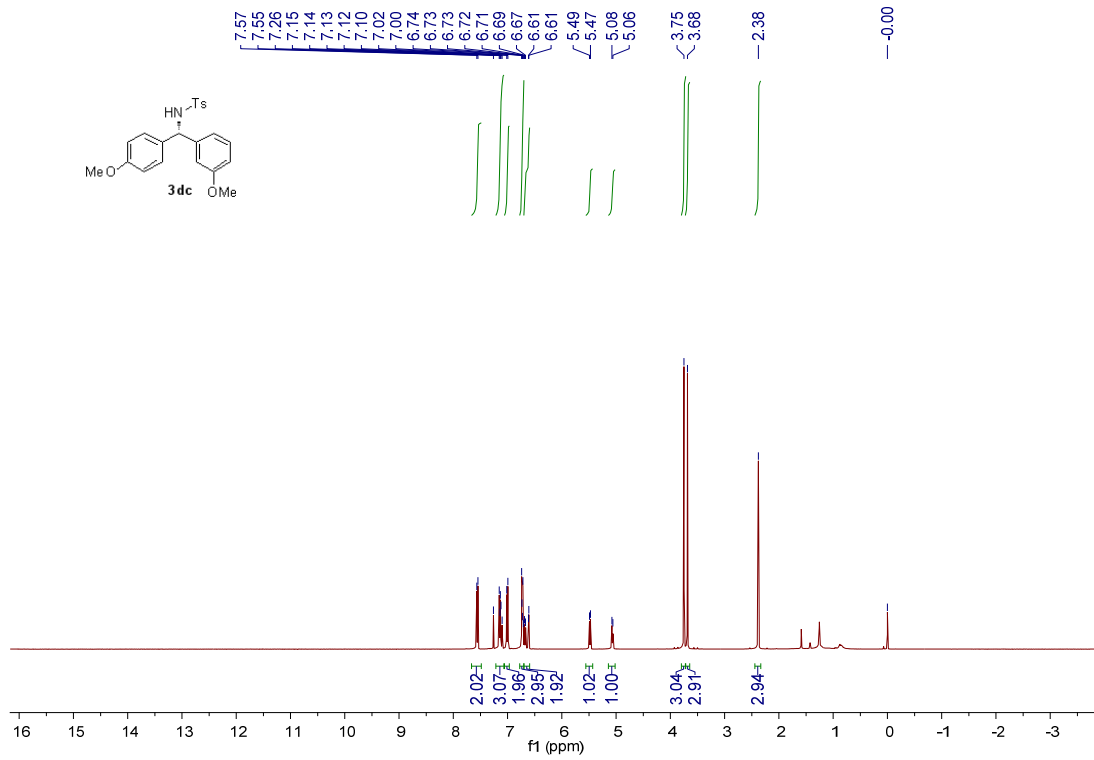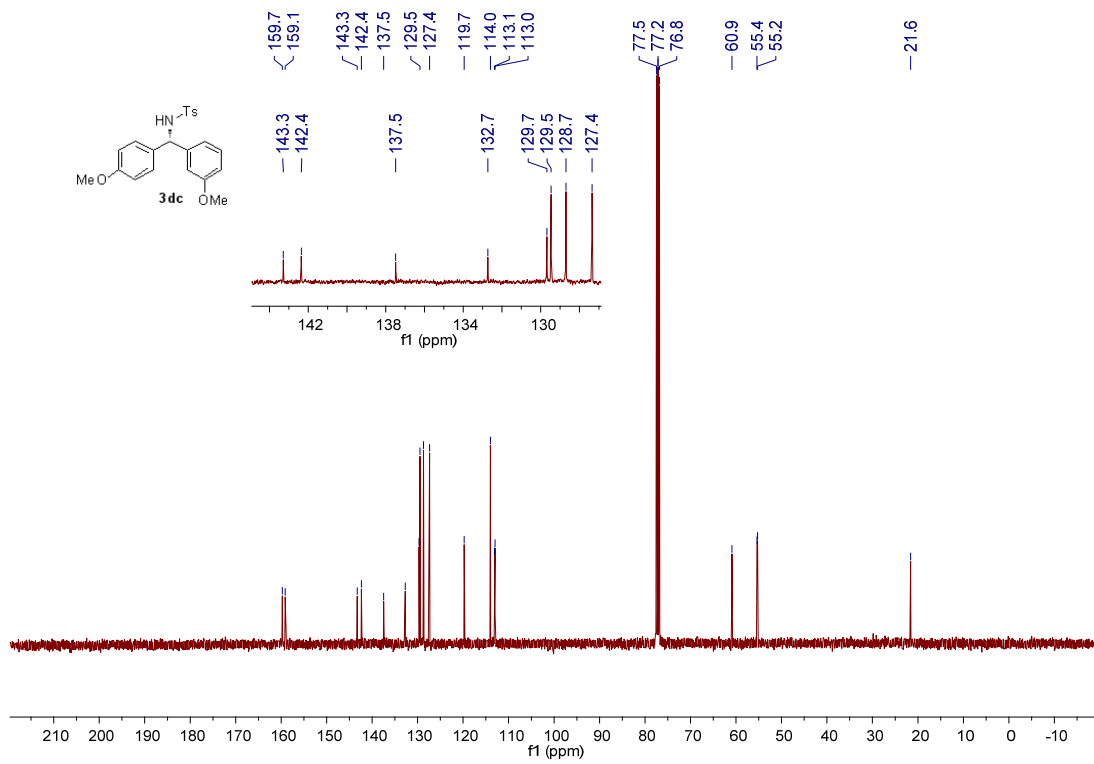



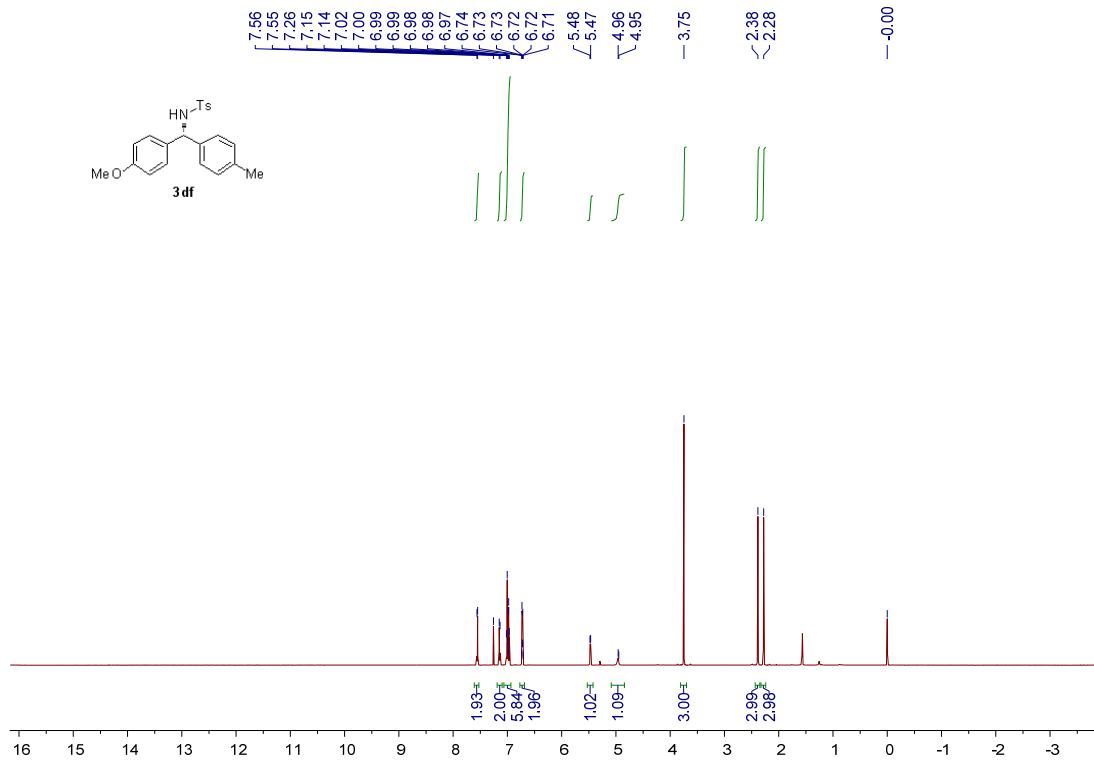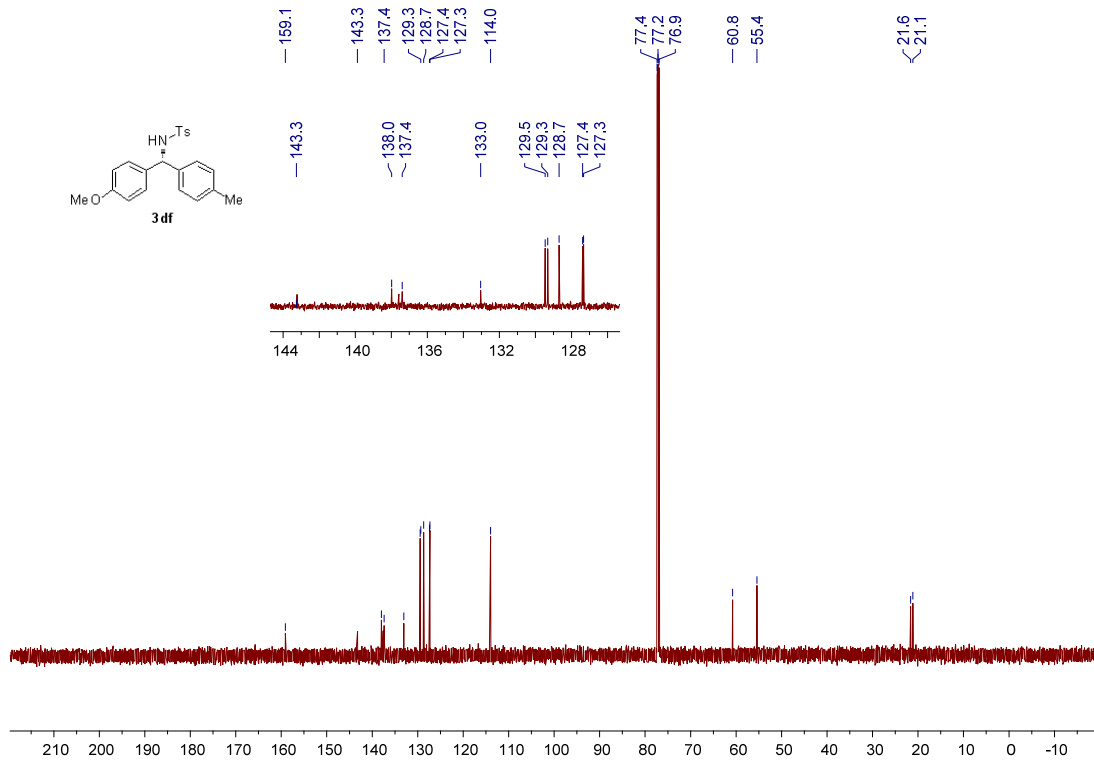

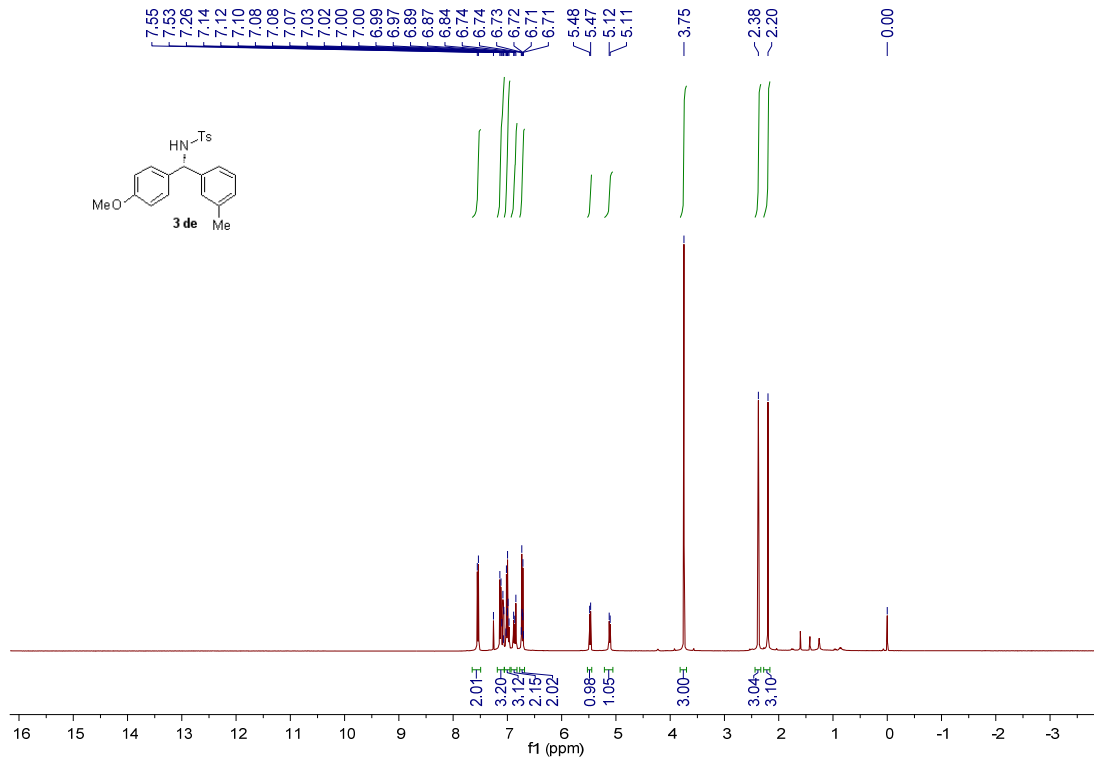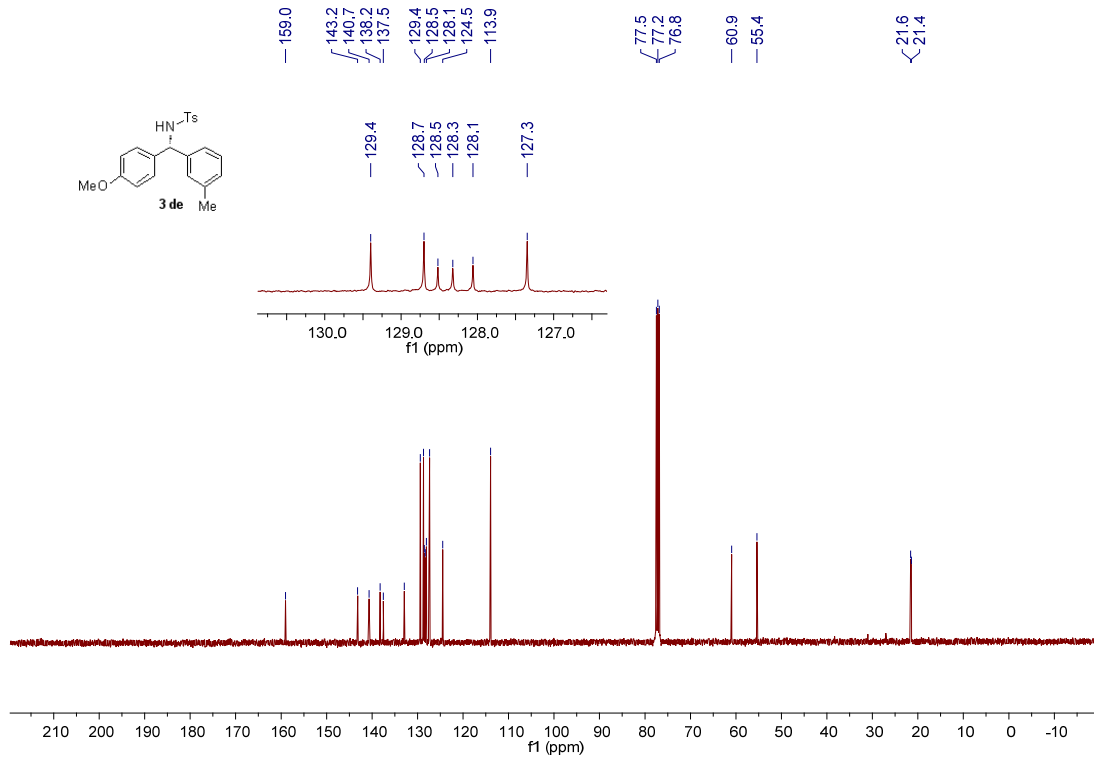

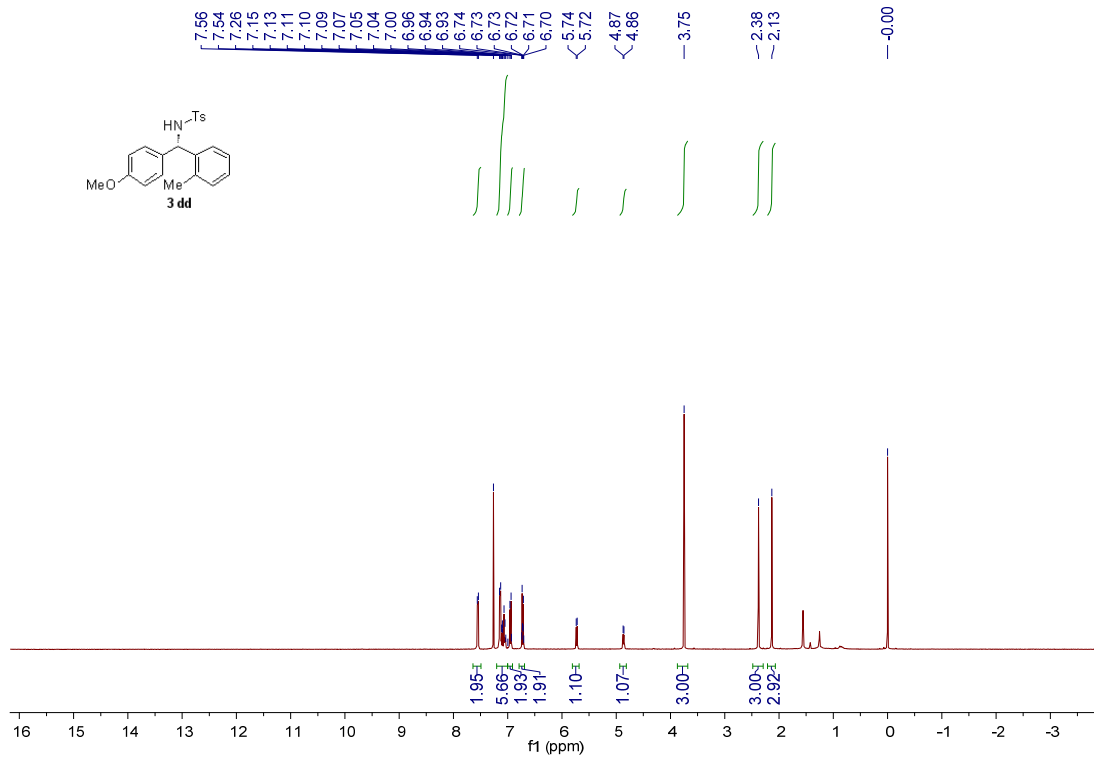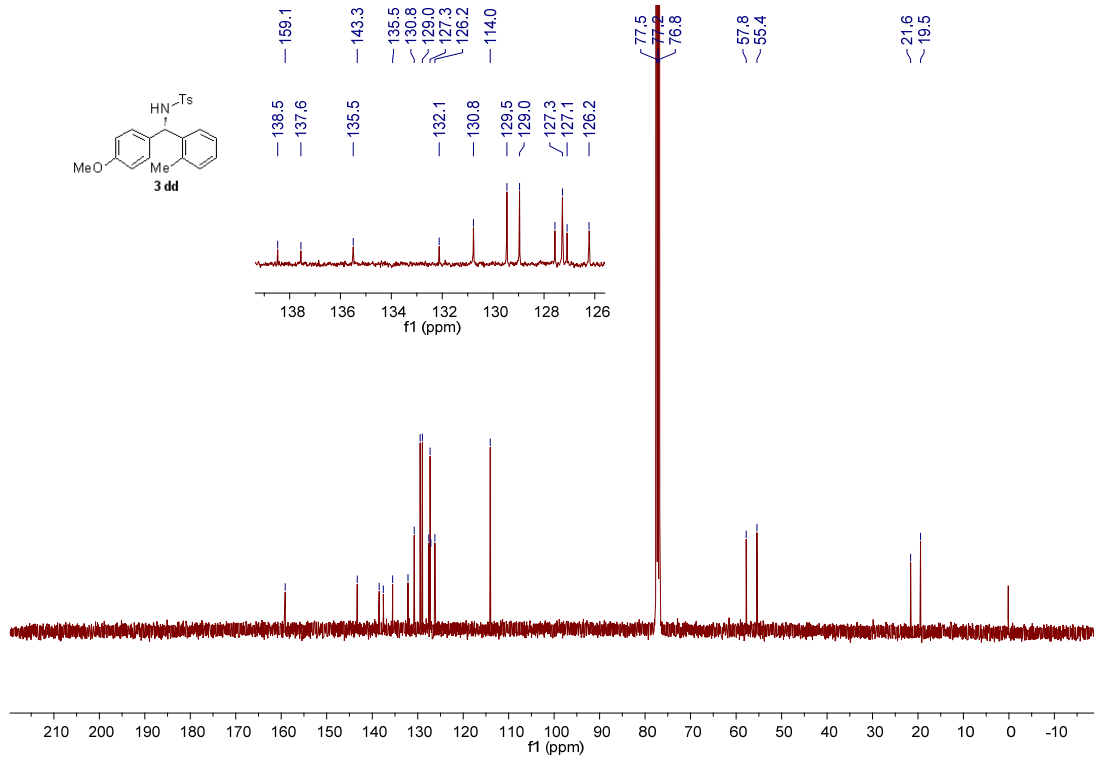

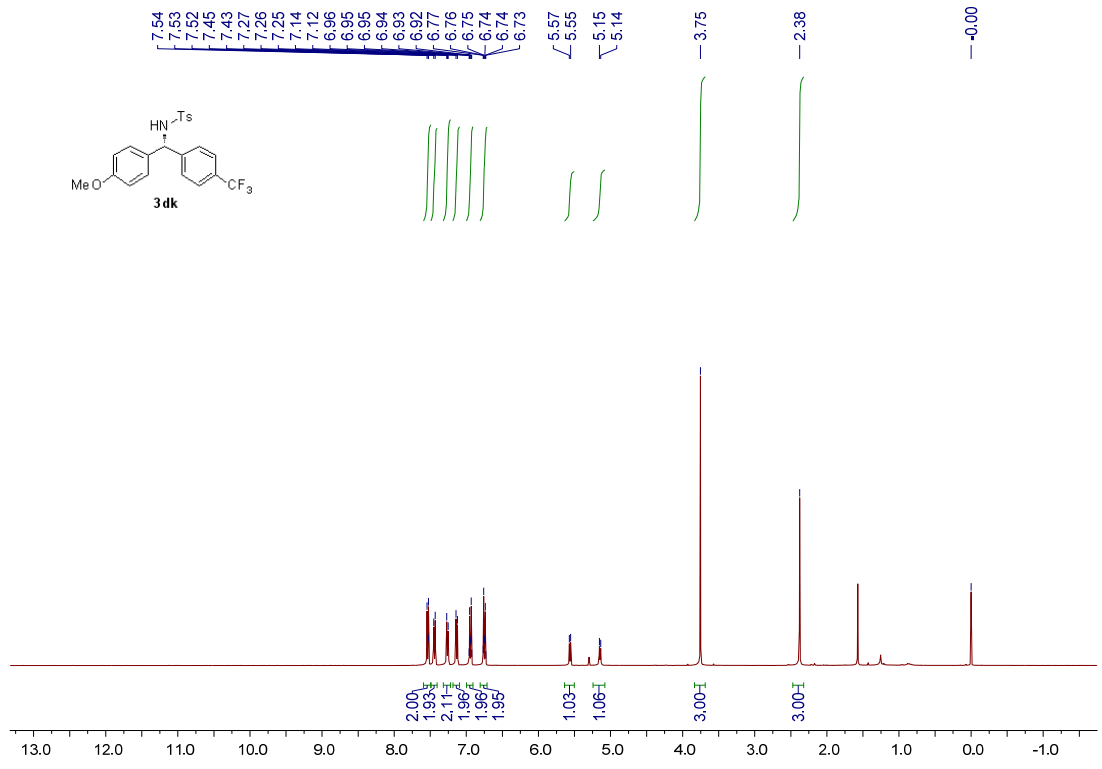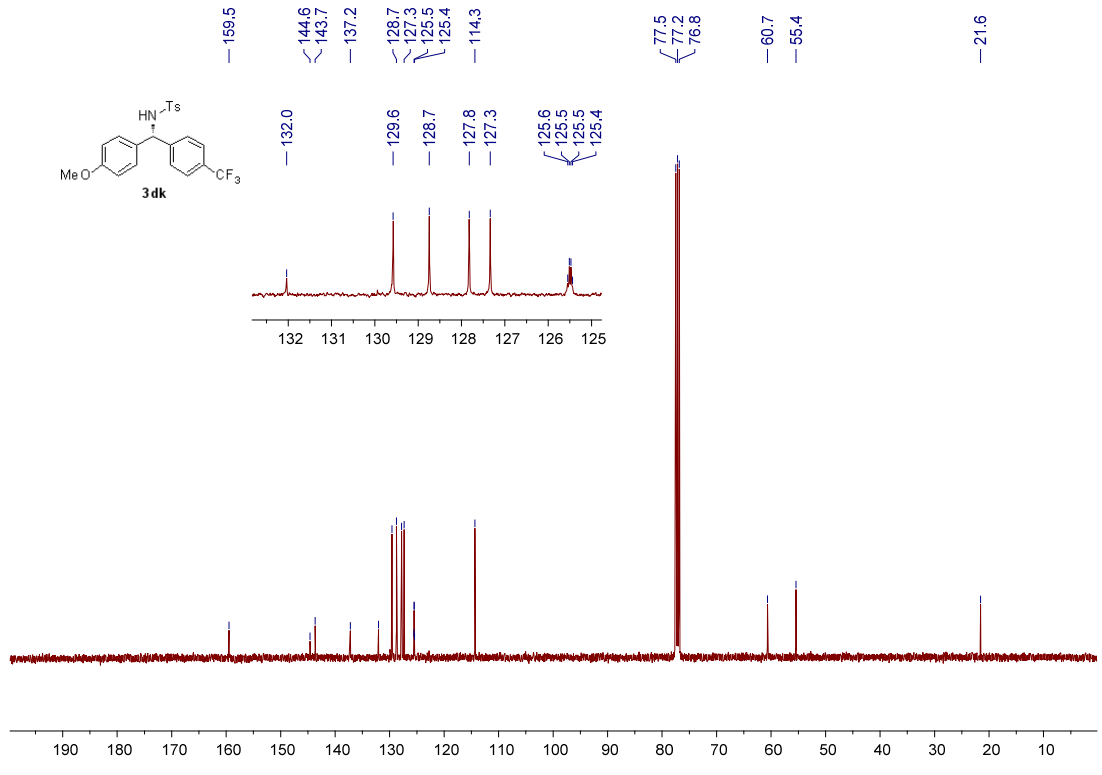

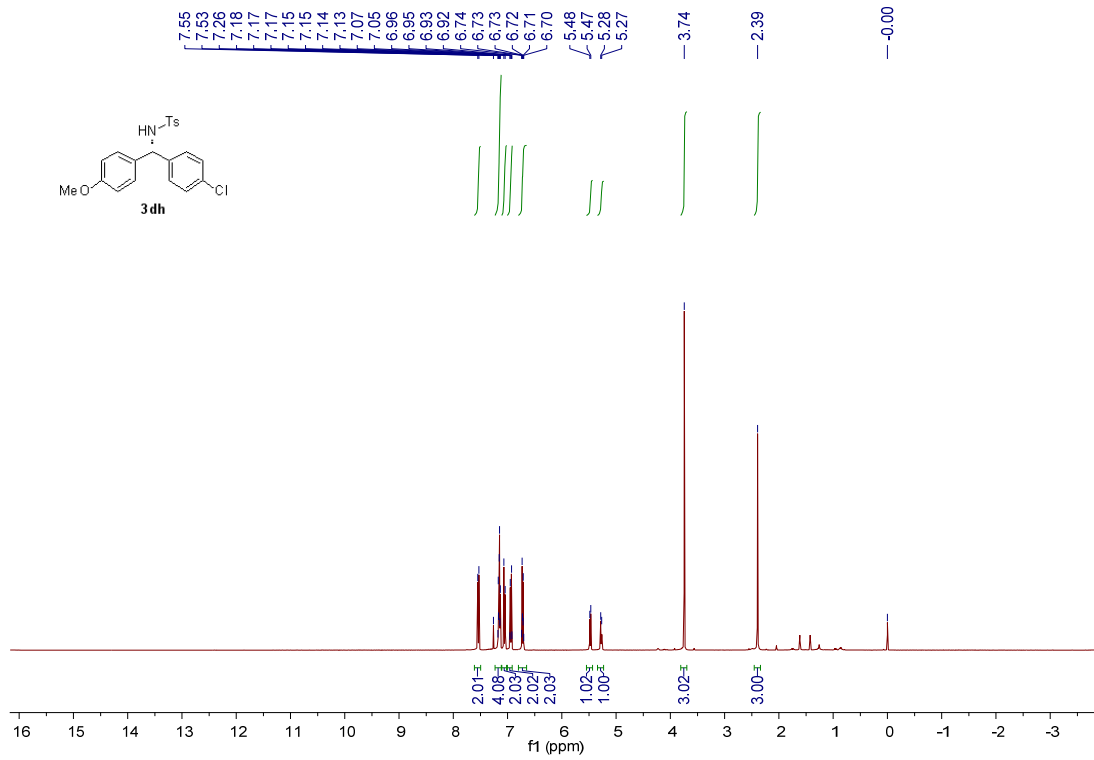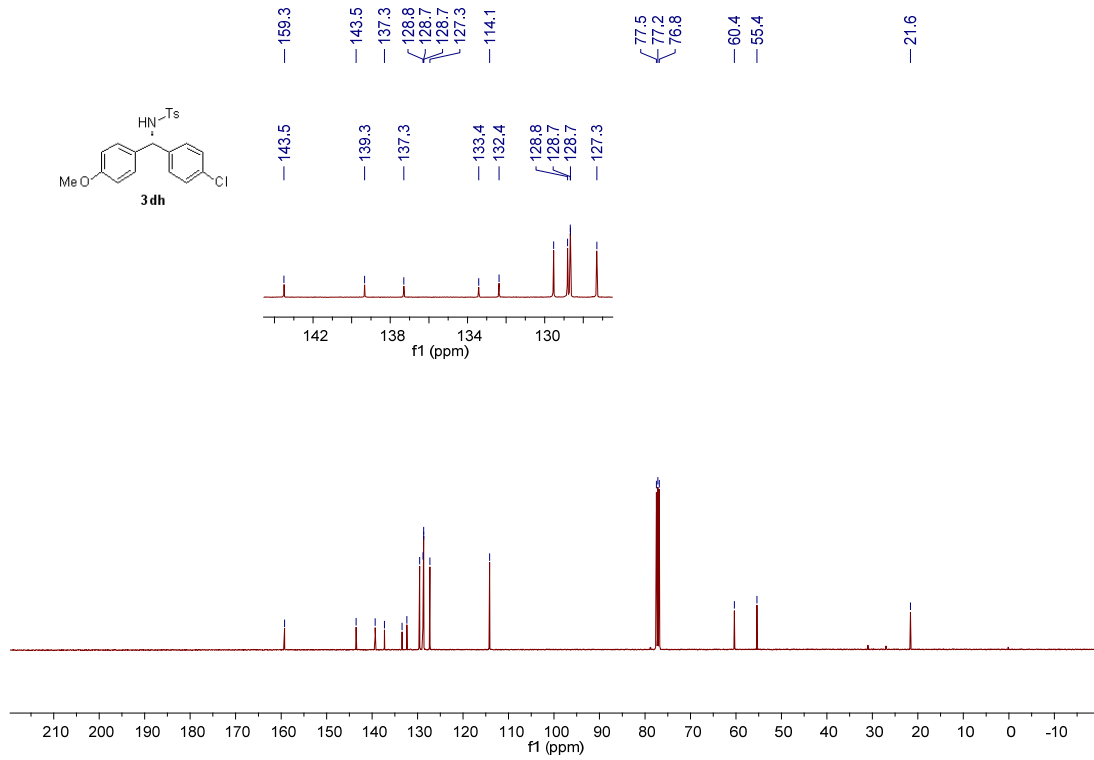

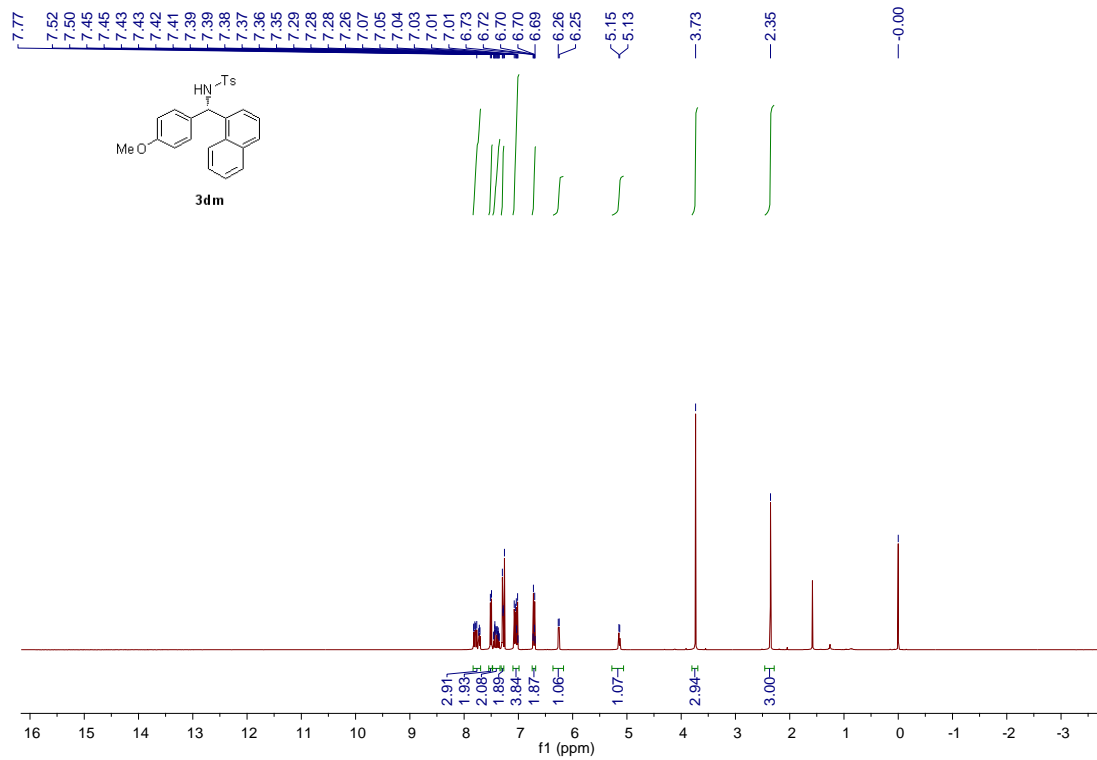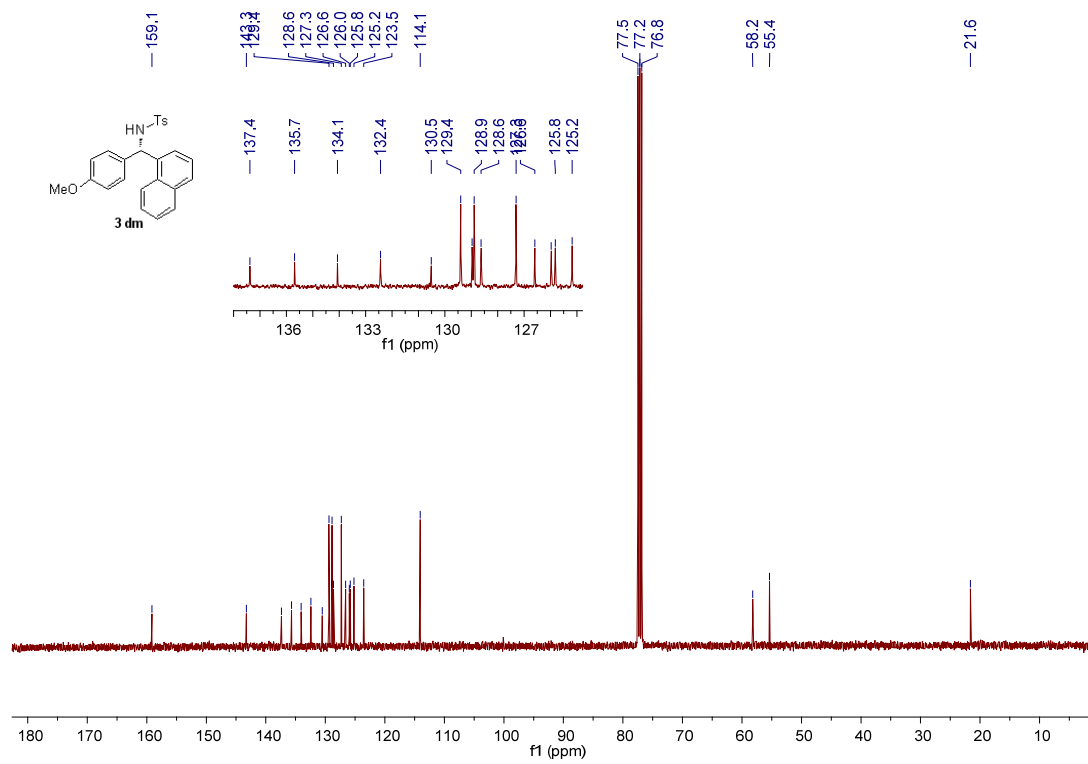

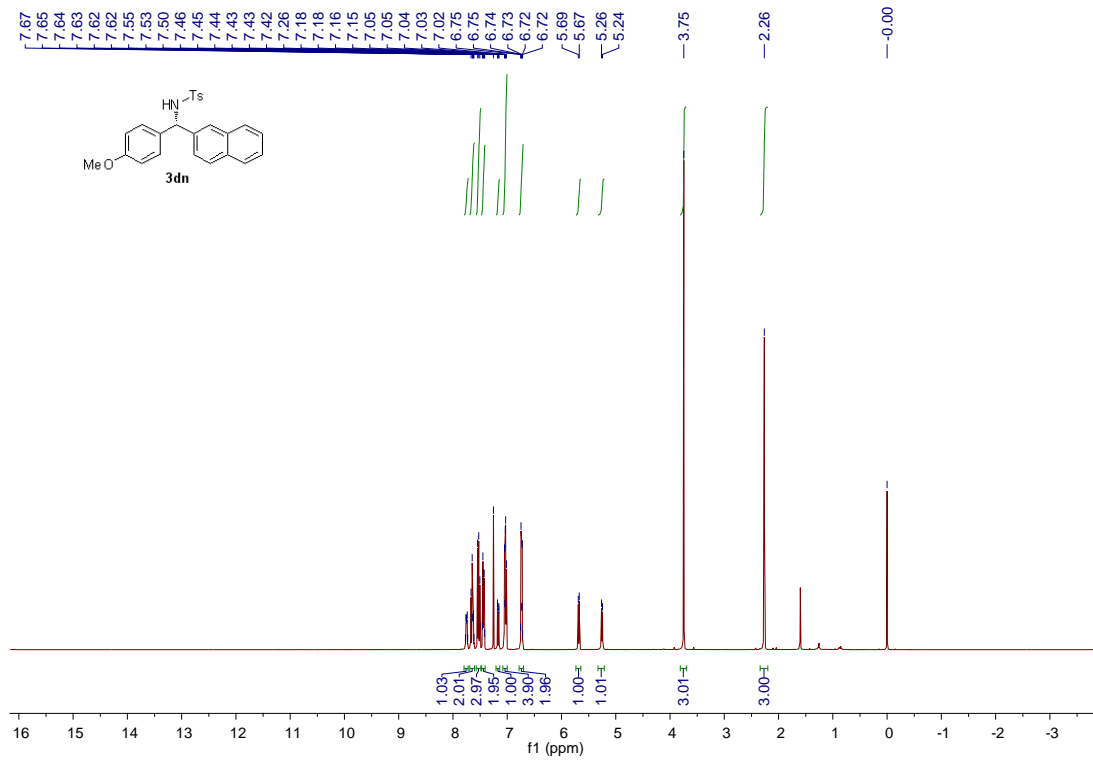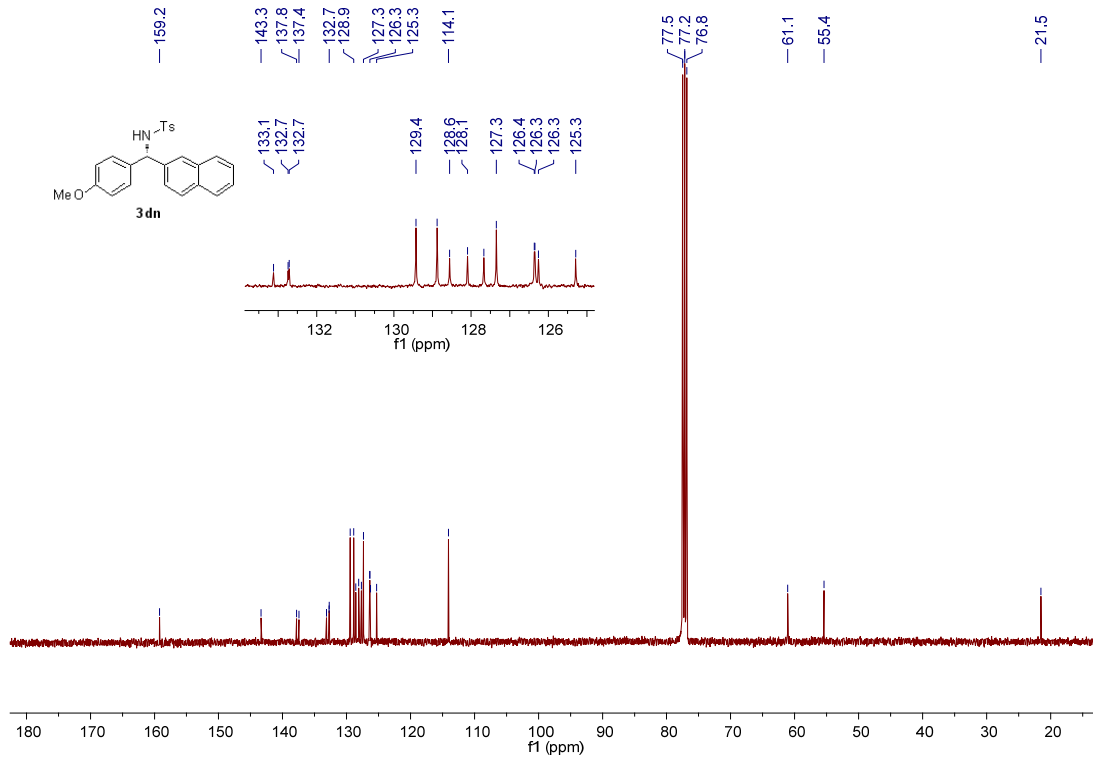

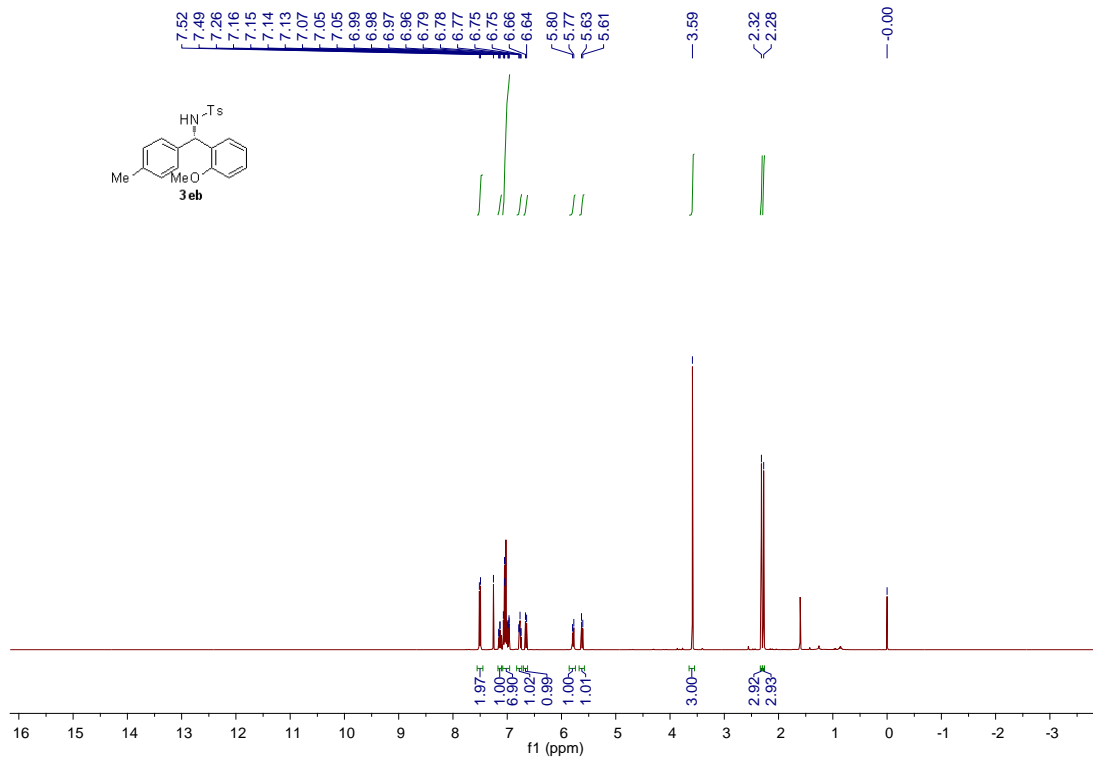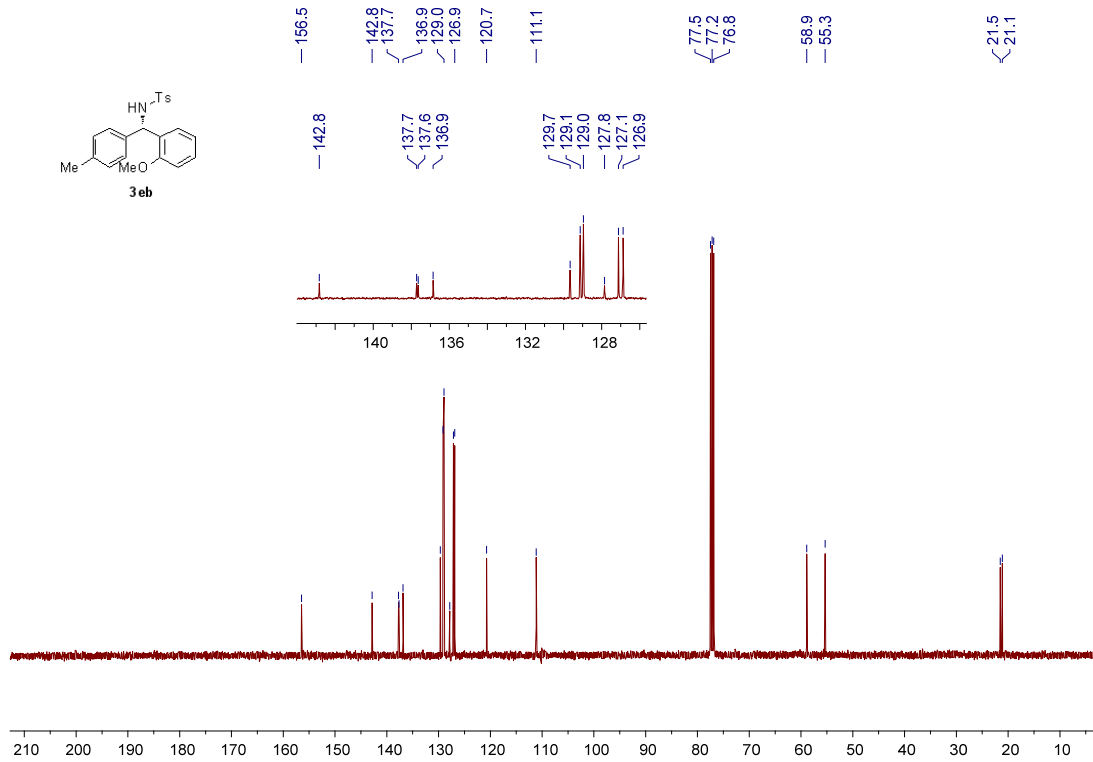



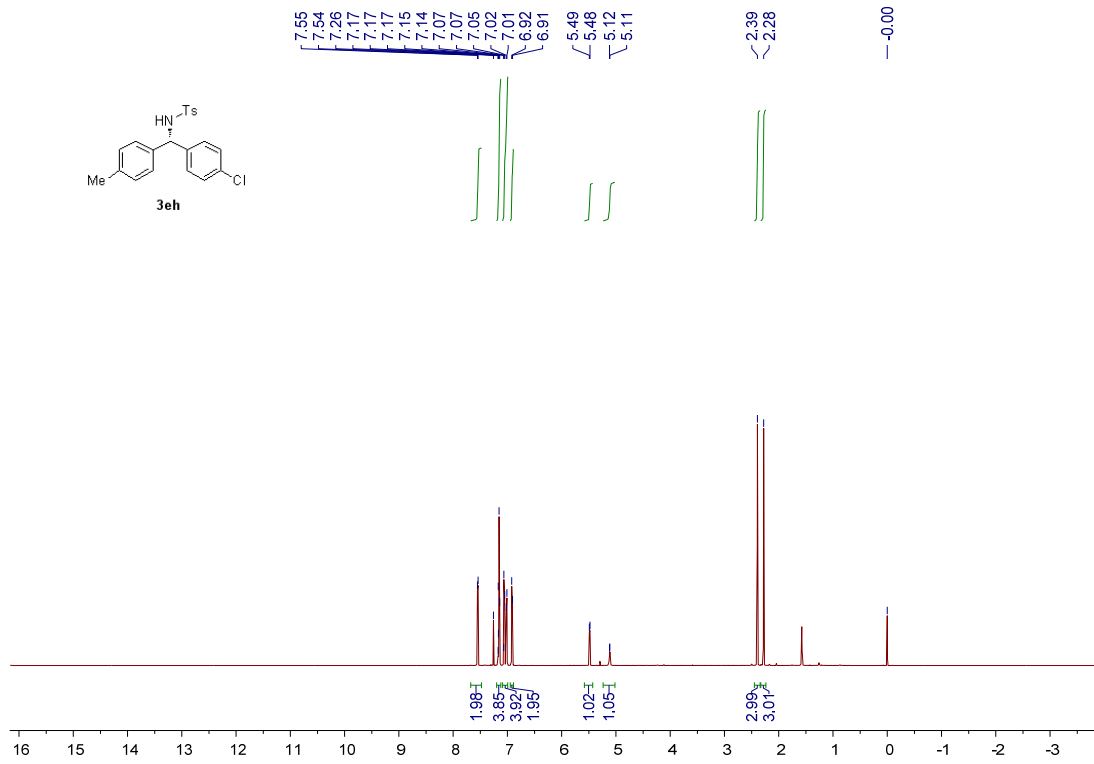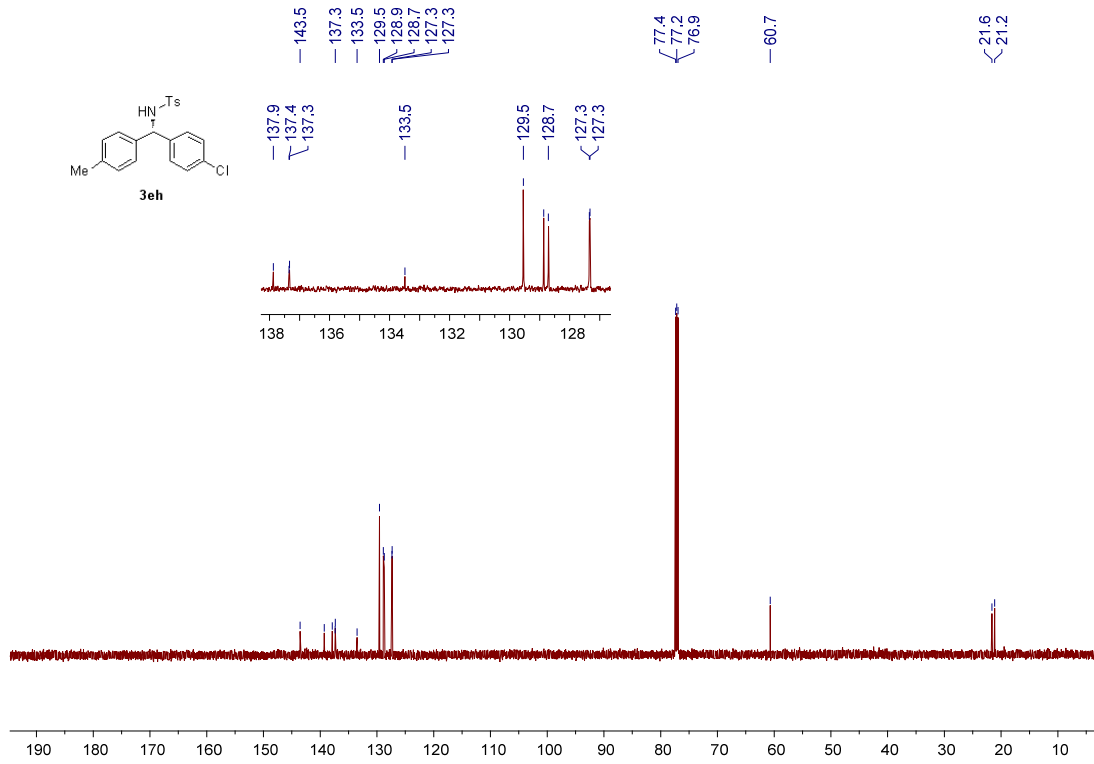

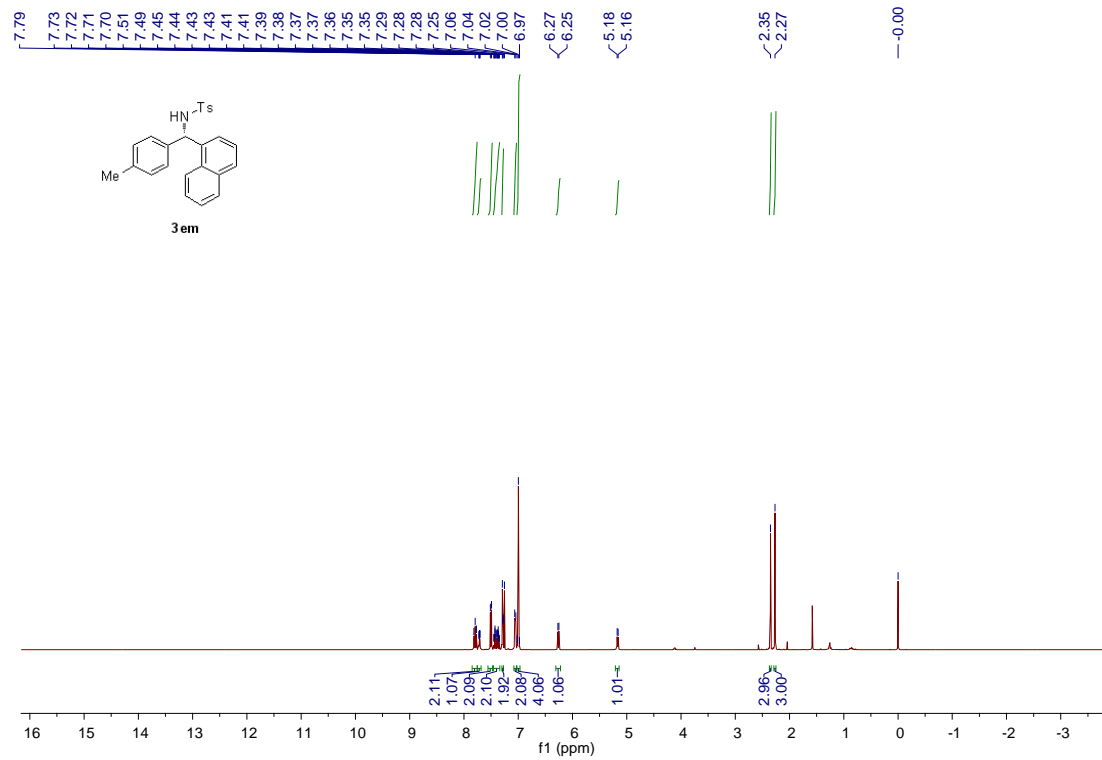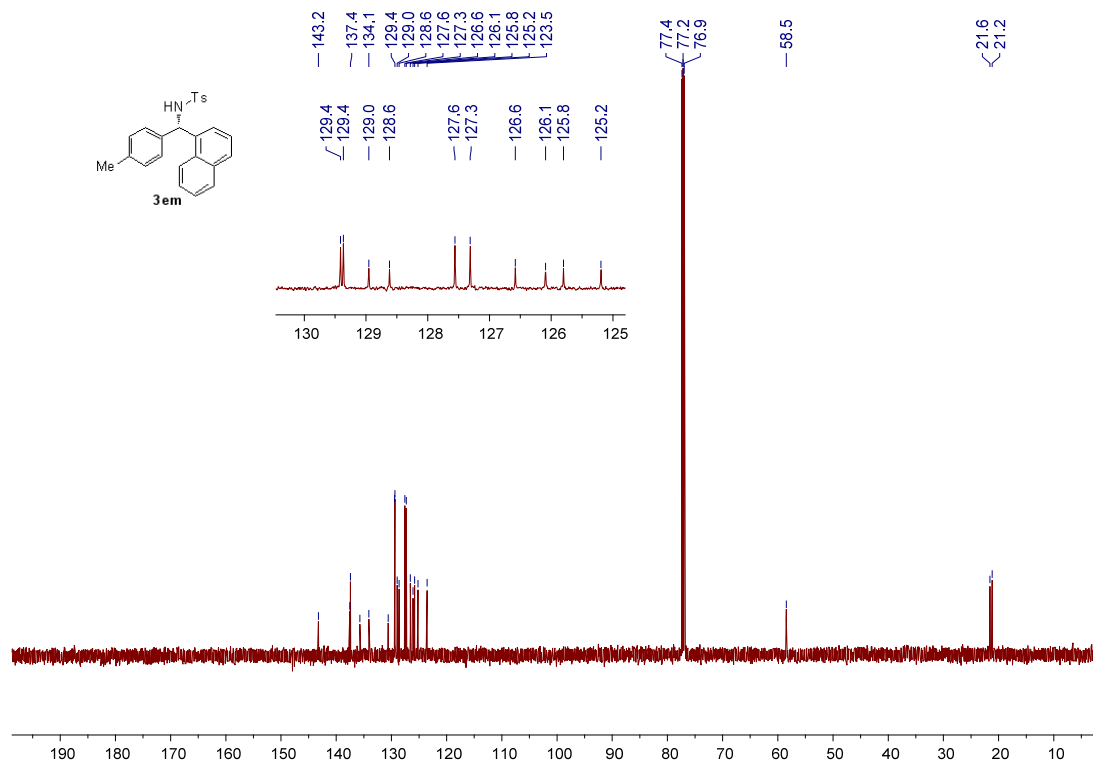

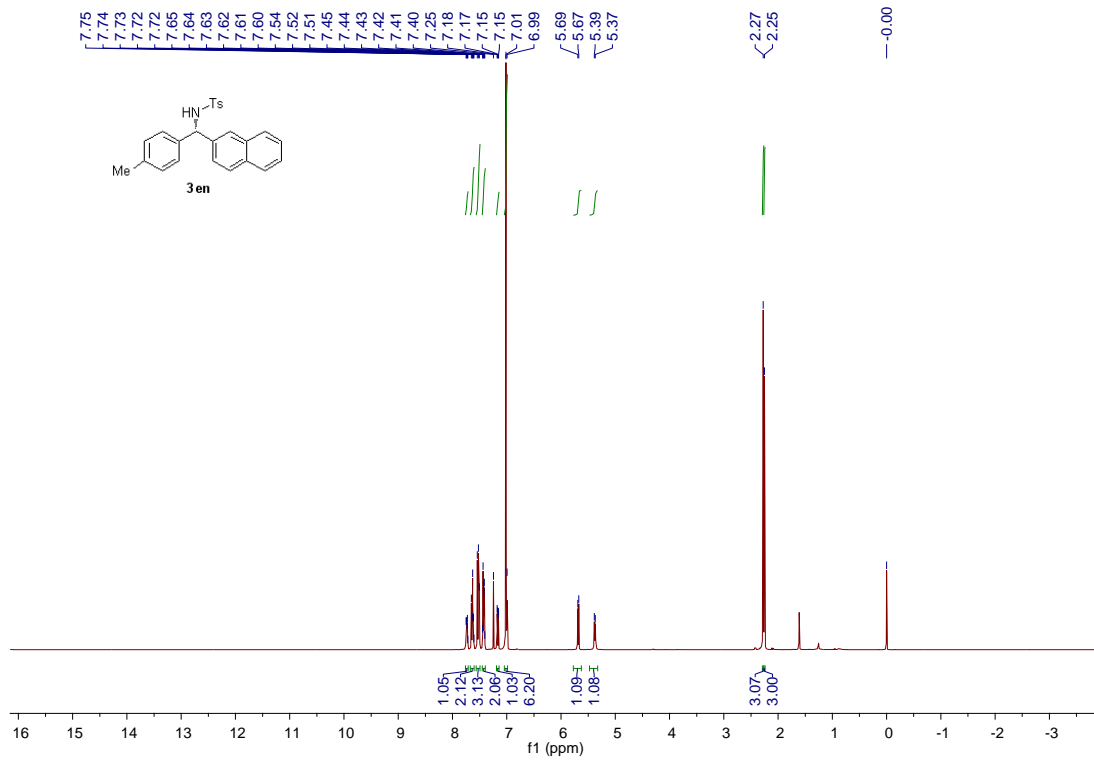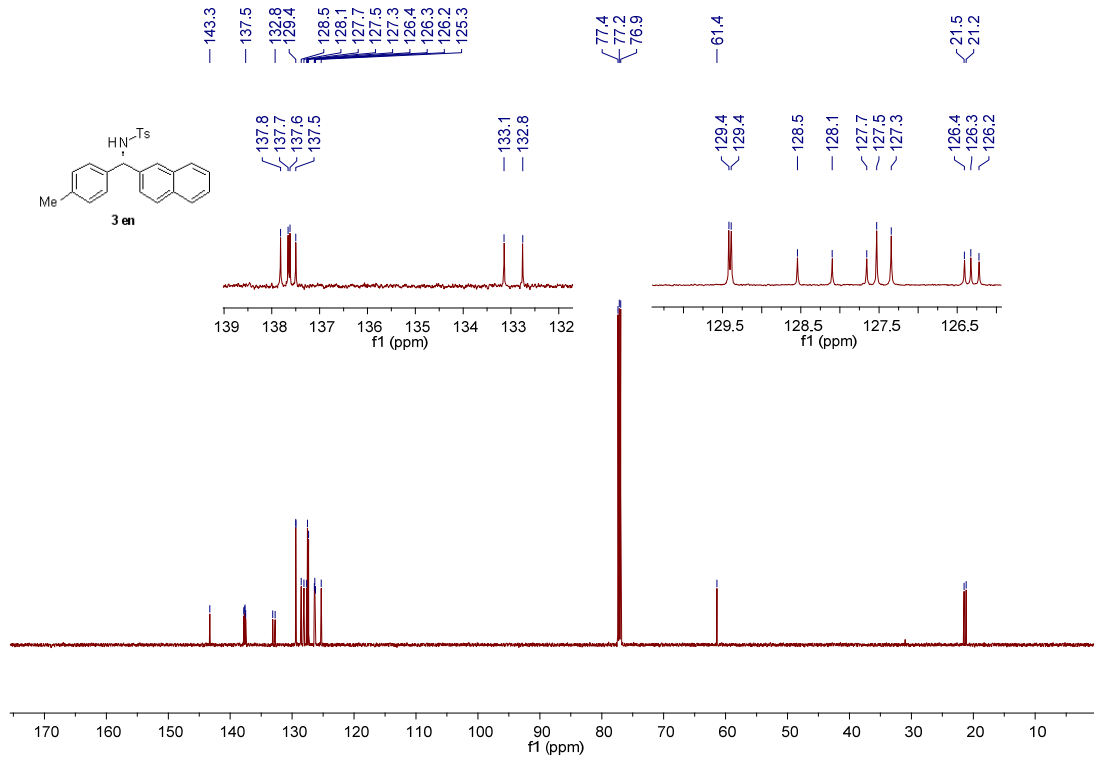

Supplement: c9ra04836g1.pdf [file c9ra04836g1.pdf]
